# Supplementary material for: Pendant amine-promoted complete eight-electron photoreduction of CO2 to methane by a molecular nickel catalyst
Source: Royal Society of Chemistry journal article supplement (doi:10.1039/d6sc02569b), 2026-06-04
Supplement: d6sc02569b1.pdf [file d6sc02569b1.pdf]

# Supporting information

## for

### **Pendant Amine-Promoted Complete Eight-Electron Photoreduction of CO<sub>2</sub> to Methane by a Molecular Nickel Catalyst**

Chandan Das<sup>a</sup>, Liton Seikh<sup>a</sup>, Abhishek Saini<sup>a</sup>, Gazal Sabharwal<sup>a</sup>, Somnath Guria, Piyali Majumder<sup>a</sup>, Maravanji S. Balakrishna<sup>a</sup>, Goutam K Lahiri<sup>a</sup>, and Arnab Dutta<sup>\*a,b,c</sup>

<sup>a</sup>Department of Chemistry, Indian Institute of Technology Bombay, Powai, Mumbai 400076, India

<sup>b</sup>Centre for Climate Studies, Indian Institute of Technology Bombay, Powai, Mumbai 400076, India

<sup>c</sup>National Centre of Excellence CCUS, Indian Institute of Technology Bombay, Powai, Mumbai 400076, India

\* Email: [arnab.dutta@iitb.ac.in](mailto:arnab.dutta@iitb.ac.in)

## 1. Materials and Methods:

### 1.1 Reagent Information:

$\text{Ni}(\text{ClO}_4)_2 \cdot \text{H}_2\text{O}$ , 2,6-diaminopyridine, pyridine, NaOH solution and Nitroso benzene,  $[\text{Ir}\{\text{dF}(\text{CF}_3)\text{ppy}\}_2(\text{bpy})]^+$  and  $[\text{Ir}\{\text{dF}(\text{CF}_3)\text{ppy}\}_2(\text{dtbbpy})]^+$ , CzIPN (1,2,3,5-Tetrakis(carbazol-9-yl)-4,6-dicyanobenzene), were purchased from Sigma-Aldrich India. Tetrabutyl-ammonium tetrafluoroborate was purchased from TCI India Pvt. Ltd. Acetone (HPLC and Spectroscopy), Dimethylacetamide (HPLC and Spectroscopy grade), triethylamine (AR/ACS) and diethyl ether (AR/ACS), methanol (HPLC and gradient), dichloromethane (AR/ACS), triethanolamine (AR/ACS), Pyridine (AR/ACS), sodium hydroxide (AR), sodium sulphate, anhydrous (AR/ACS), potassium chloride (AR), acetonitrile (HPLC and Gradient) were purchased from Finar Chemicals Pvt. Ltd. India. All the analytical reagents were used in laboratory as received without any further purification. Solvents are distilled using standard protocols. Millipore water (18.2 M $\Omega$ .cm resistivities at 298K) was used during experimental analysis. For column chromatography silica gel (100-200 mesh) was supplied from SRL Co. During elution petroleum ether and ethyl acetate mixture was used. Thin layer chromatography was performed on EMD Chemicals Si 60 F254. TLC plates (silica gel 60F254) were supplied from MERCK.

### 2. Analytical Information:

Characterization of the nickel complex was done by optical spectroscopy, FTIR, EPR, Cyclic Voltammetry, Photocatalytic LED, and Mass spectrometry.

#### 2.1. UV-Visible (UV-Vis) Absorption Spectroscopy:

UV-vis absorption spectra were recorded at room temperature in dimethylacetamide (DMA) solution on Ocean Optics spectrophotometer with 240.00 ms integration time and near 10 average scans. 2 ml of sample was placed in a 3.0 ml quartz cuvette (1 cm path length) placed in an external sample holder connected to light source and detector via optical fibers.

#### 2.2. Fourier Transform Infrared (FT-IR) Spectroscopy:

FT-IR spectra were recorded in % transmittance mode at room temperature using solid KBr pellet on Perkin-Elmer FT-IR spectrometer. Moreover, the FTIR spectra of samples were also recorded in the OTTLE cell by dissolving in DMA.

### **2.3. Electron Paramagnetic Resonance (EPR) Analyses:**

EPR spectra were collected at IIT Bombay on JES - FA200 ESR Spectrometer with X and Q band, a cylindrical mode cavity, at 77K.

### **2.5. Electrochemical Information:**

The cyclic voltammetry (CV) experiment was carried out at room temperature in DMA solution using the Metrohm Auto lab PGSTAT 204 potentiostat.

### **2.6. Cyclic Voltammetry (CV) Study in Organic Solvent:**

The cyclic voltammetry (CV) technique was utilized for studying the electrochemical behavior of molecular complex. These studies were primarily executed in an organic medium (DMA) at room temperature, employing 0.1 M tetrabutylammonium tetrafluoroborate [TBABF] ( $n\text{Bu}_4\text{N}^+ \text{BF}_4^-$ ) as the supporting electrolyte. The analyte concentration was maintained at 1 mM in all the cases unless mentioned otherwise. The cyclic voltammograms were recorded using a three-electrode assembly, employing a 1 mm diameter glassy carbon disc as the working electrode, Pt-wire as a counter electrode, and Ag/AgCl (in 3M KCl) as a reference electrode. All the potential values in organic were reported against ferrocene redox couple ( $\text{FeCp}_2^{+/0}$ ). The electrochemistry setup consists of a glass cell (capacity 5mL), covered with PTFE cap containing four inlets. Three of those inlets are utilized for inserting the working, counter, and reference electrodes, while the final inlet was deployed for purging gas.

### **2.7. Bulk or Control Potential Experiment in DMA Medium:**

Bulk Electrolysis (BE) or control potential experiment (CPE) was performed in an air-tight 50 ml four neck glass vessel. Three of these outlets were fitted with various electrodes; 1 cm x 1 cm vitreous carbon as a working electrode; 5 cm coiled platinum wire as a counter electrode, and Ag wire as a reference electrode. The last outlet was closed by a B-14 suba® seal rubber septum, which was used for purging  $\text{CO}_2$  (for 30 minutes) before the experiments and for headspace gas collection. During an experiment, 15 mL of 1 mM complexes were added to the vessel, all electrodes (along with a magnetic bead) were inserted along with a B-14 rubber septum cap (in a gas-tight manner). Then, the chrono-coulometric experiment was started at corresponding catalytic potentials in DMA media. The reaction solution was continuously stirred during the experiment. Headspace gas was collected by a GASTIGHT® PTFE leur-lock 1000 series (1001TLL) 1 mL Hamilton® syringe after certain time intervals, and it was analyzed via gas chromatography (GC) instrument on FID mode.

## 2.8. Photocatalytic Investigation:

Photocatalytic CO<sub>2</sub> reduction experiments were conducted using a 10 mL photocatalytic vial filled with DMA solution. The light source for the photocatalytic experiments was a Kessil KSPR160L-440 nm LED bulb. The complete set of reactions indicated the following optimized conditions for CO<sub>2</sub> reduction for both the catalysts: All the photochemical experiments were carried out under 2 μM catalyst concentration in DMA (2 mL), BIH (0.2 M) as the electron donor, and Photosensitizer (PS) (5 mM), irradiated with a 440 nm LED. Before each experiment, samples were purged for 30 minutes with CO<sub>2</sub> gas to degas the solution and the reaction mixture was continuously stirred during the experiment. The head-space gas was collected by a GASTIGHT® PTFE leur-lock 1000 series (1001TLL) 1 mL Hamilton® syringe after certain time intervals and was analysed via gas chromatography (GC) instrument on FID mode.

## 2.9. Gas Chromatography Analysis:

The amount of CO<sub>2</sub>/CO and CH<sub>4</sub> and CO/CH<sub>4</sub> evolved during catalysis were quantified by using Shimadzu gas chromatography (GC) instrument with TCD/FID detector with a 5 Å molecular sieve/ Porapak-N at room temperature. Instrument calibration build up curve was created manually by injecting variable amount (0.5%-2%) of known CO<sub>2</sub> and CO gas mixtures.

**2.10. GC-MS Analysis:** To confirm that CO is the exclusive product of CO<sub>2</sub> reduction in the photocatalytic process, the reaction was repeated under identical photochemical conditions using isotopically labeled <sup>13</sup>CO<sub>2</sub> in place of <sup>12</sup>CO<sub>2</sub>. The resulting gaseous products were analyzed using a Shimadzu GC-MS-QP2020 equipped with a ShinCarbon ST 100/120 column (2 m, 1 mm, 1/16" OD, Silco). The photocatalytic experiments were conducted with a catalyst concentration of 50 μM in DMA solvent, employing BIH (0.02 M) as the electron donor, under visible-light irradiation provided by a 440 nm LED source.

**2.11. CHNS analysis:** The CHNS of all the samples were recorded by a Flash smart V CHNS/O instrument made by Thermo Fisher Scientific, which was used to estimate of CHN/CHNS/O in percentage level to high concentration level.

**2.12. Dynamic Light Scattering Measurement:** Dynamic light scattering (DLS) measurements were performed using a Zetasizer Nano ZS equipped with an avalanche photodiode detector and

correlator system (ZEN 3600, Malvern Instruments). A He–Ne laser operating at 4 mW and emitting vertically polarized light at 638 nm was employed as the excitation source. All measurements were carried out at 25 °C with the scattering angle fixed at 90° under non-invasive back-scattering (NIBS) mode.

### **2.13. Mass Spectrometry analysis**

HRMS of the samples was recorded with a Bruker maXis impact in positive mode.

#### **TON (Turn over number):**

To determine the turnover number (TON), we first quantified the total amount of CO produced during the electrochemical reaction. The gaseous products were analyzed using gas chromatography (GC), where the peak area corresponding to CO was compared against a calibrated standard curve to obtain the exact amount of CO generated, expressed in millimoles. In parallel, the millimoles of catalyst introduced into the reaction were calculated based on its known concentration and the solution volume used. The TON was then calculated by dividing the millimoles of CO formed by the millimoles of catalyst present. Thus, the TON directly reflects how many molecules of CO each molecule of catalyst can produce under the given reaction conditions, providing a quantitative measure of catalytic efficiency.

#### **TOF (Turn over frequency):**

The turnover frequency (TOF) was determined by dividing the calculated TON by the reaction time corresponding to the formation of the product. In practice, once the TON was obtained from the ratio of CO produced (mmol) to the catalyst used (mmol), the TOF was calculated as TON per unit time (typically expressed in h<sup>-1</sup>). This value represents how many catalytic cycles each catalyst molecule completes per hour under the applied reaction conditions.

#### **Apparent Quantum Yield measurements (AQY):**

The apparent quantum yield was determined following the procedure previously reported by Robert and co-workers in *ChemSusChem* 2024, 17, e202301892. For the QY calculation, the time interval exhibiting the highest CO production rate (highest TOF) over a minimum continuous

period of 10 h was selected. This approach allows the determination of the maximum observable quantum efficiency of the catalytic system by minimizing the influence of catalyst deactivation, photosensitizer degradation, or product accumulation that may occur during prolonged irradiation.  $AQY = (N_e/N_p) \times 100\% = (\text{number of reacted electrons/number of incident photons}) \times 100\%$ ;  $N_e = 2(nCO)(N_A)$ ;  $N_p = (IAt\lambda)/hc$ ; The amount of substance of CO (nCO): in mol; Avogadro constant ( $N_A$ ):  $6.023 \times 10^{23} \text{ mol}^{-1}$ ; Light power density (I):  $50 \text{ mW}\cdot\text{cm}^{-2}$ ; Area of irradiation (A):  $2.012 \text{ cm}^2$ ; Incident wavelength ( $\lambda$ ): 440 nm; Reaction time (t): 10 h; Planck constant (h):  $6.626 \times 10^{-34} \text{ J}\cdot\text{s}$ . The photochemical experiments were carried out under  $2 \mu\text{M}$  catalyst concentration in DMA (2 mL), BIH (0.2 M) as the electron donor, and Photosensitizer (PS) (5 mM), irradiated with a 440 nm LED. Before each experiment, samples were purged for 30 minutes with  $\text{CO}_2$  gas to degas the solution and the reaction mixture was continuously stirred during the experiment. The head-space gas was collected by a GASTIGHT® PTFE leur-lock 1000 series (1001TLL) 1 mL Hamilton® syringe after certain time intervals and was analysed via gas chromatography instrument on FID mode.

$$\begin{aligned} AQY &= (N_e/N_p) \times 100\% \\ &= 1.912 \times 10^{-3} \\ &\sim 2 \times 10^{-3} \end{aligned}$$

### 3. Synthesis Procedure:

#### 3.1. 6-amino-2(phenyl-azo)-pyridine:

The ligand 6-amino-2(phenyl-azo)-pyridine (**L1**) was synthesized as per reported by Dutta and co-workers.<sup>1</sup> In Summary, 1.00 g of 2,6-diaminopyridine (9.16 mmol) was dissolved in 10 mL of pyridine and mixed with 5 mL of 50% aqueous NaOH solution. Then 0.96 g of nitroso benzene (9 mmol), dissolved in 5 mL pyridine, was added dropwise to the mixture for 3 hours, followed by reflux for 20 hours. The thin-layer chromatography was utilized for confirmation of completion of reaction. The dark red mixture solution was diluted with water and extracted with dichloromethane (DCM) (4 x 100 mL). A dark red crude was obtained from evaporation of the DCM layer, which

was further purified by column chromatography (100% DCM), using neutral alumina as stationary phase.

### 3.2. Synthesis of C1 catalyst:

The 6-amino-2(phenyl-azo)-pyridine (99 mg/0.50 mmol) in 10 ml DCM was dropwise added (under N<sub>2</sub>) to a methanol/dichloromethane (1:2) mixture containing 92 mg of Ni(ClO<sub>4</sub>)<sub>2</sub>·6H<sub>2</sub>O (365.69 g/mol) (0.25 mmol). The mixture solution was stirred for 1 hour at room temperature. Finally, a yellowish-brown solution was obtained that was evaporated under the vacuum. Upon addition of ligand, an immediate color transition to reddish-orange was observed, indicating complexation, followed by the formation of a precipitate. After filtration, sequential washing with water, methanol, and acetonitrile, and drying, C1 was obtained as a yellowish-brown solid with a yield of ~72%. HRMS (ESI, +ve mode, MeOH) m/z for Z=1) [M + H<sup>+</sup> (C<sub>22</sub>H<sub>20</sub>N<sub>8</sub>Ni<sub>1</sub> + H<sup>+</sup>)]: Calculated: 455.12, Experimental: 455.12

### 3.2. Synthesis of C2 catalyst:

The 6-amino-2(phenyl-azo)-pyridine (99 mg / 0.50 mmol) in 10 ml DCM was dropwise added (under N<sub>2</sub>) to a methanol/dichloromethane (1:2) mixture containing 92 mg of Ni(ClO<sub>4</sub>)<sub>2</sub>·6H<sub>2</sub>O (365.69 g/mol) (0.25 mmol). The mixture solution was stirred for 1 hour at room temperature. Finally, a yellowish-brown solution was obtained that was evaporated under the vacuum. The precipitate from the mixture was filtered then it was washed with diethyl ether. HRMS (ESI, +ve mode, MeOH) m/z for Z=1) [M + H<sup>+</sup> (C<sub>22</sub>H<sub>20</sub>N<sub>8</sub>Ni<sub>1</sub> + H<sup>+</sup>)]: Calculated: 455.12, Experimental: 455.12

### 3.3. Synthesis of C3 catalyst:

145 mg (0.5 mol) of [2,6-diphenyl(di-azo)] pyridine was dissolved in 10 ml methanol to obtain a reddish colour solution. This methanolic solution was added dropwise to a methanol/dichloromethane (1:2) mixture containing 184 mg of Ni(ClO<sub>4</sub>)<sub>2</sub>·6H<sub>2</sub>O (365.69 g/mol) (0.25 mmol). Finally, a yellowish-green solution was obtained that was evaporated under the vacuum. The precipitate from the mixture was filtered then it was washed with diethyl ether.

HRMS (ESI, +ve mode, MeOH)  $m/z$  for  $Z=1$   $[M + H^+ (C_{17}H_{13}N_5Ni_1 + H^+)]$ : Calculated: 346.05, Experimental: 346.05.

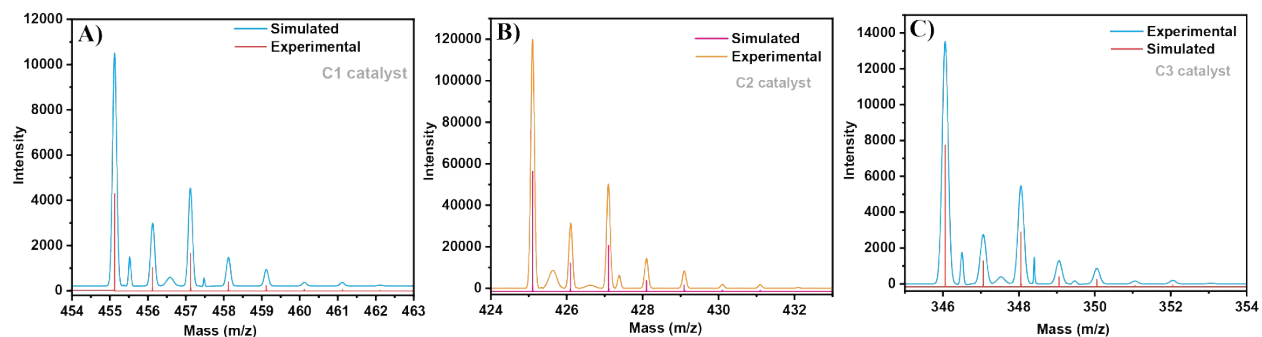

**Figure S1.** ESI-MS of **C1**, **C2**, and **C3**. Spectra recorded in MeOH at 298 K. **(A)** for **C1**, simulated (red trace), and experimental (black) **(B)** for **C2**, simulated (red trace), and experimental (black trace) **(C)** for **C3**, simulated (red trace), and experimental (black trace): data are stacked for comparison.

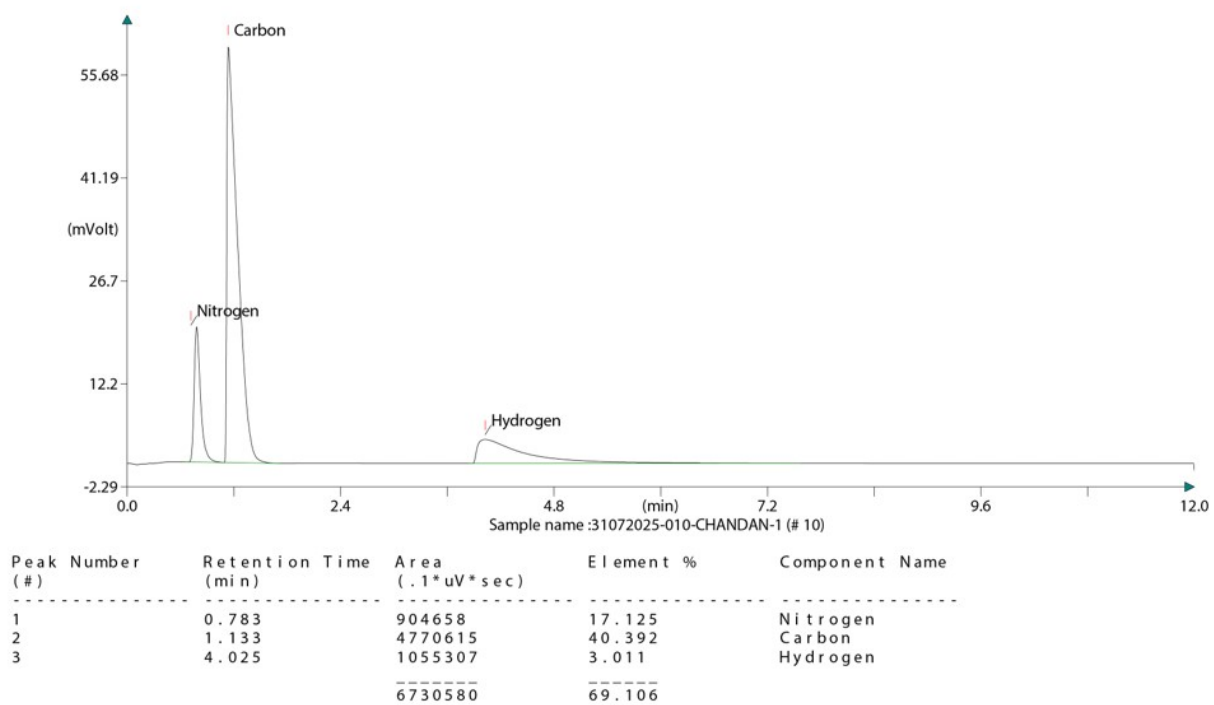

**Figure S2:** CHN elemental analysis chromatogram and composition data for C1. Experimental value elemental analysis: C, 40.39; H, 3.011; N, 17.12 and Theoretical value: C, 40.40; H, 3.08; N, 17.13.

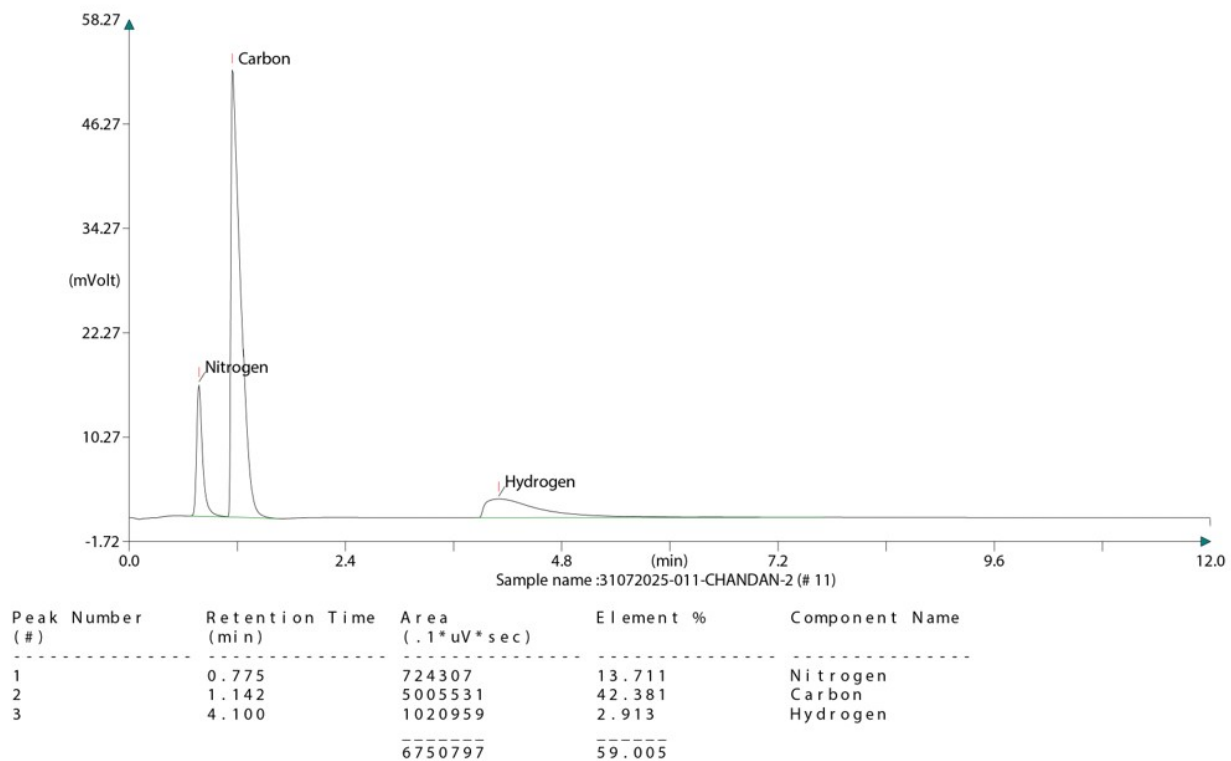

**Figure S3:** CHN elemental analysis chromatogram and composition data for C2. Experimental value elemental analysis: C, 42.381; H, 2.913; N, 13.71 and Theoretical value: C, 42.35; H, 2.91; N, 13.47.

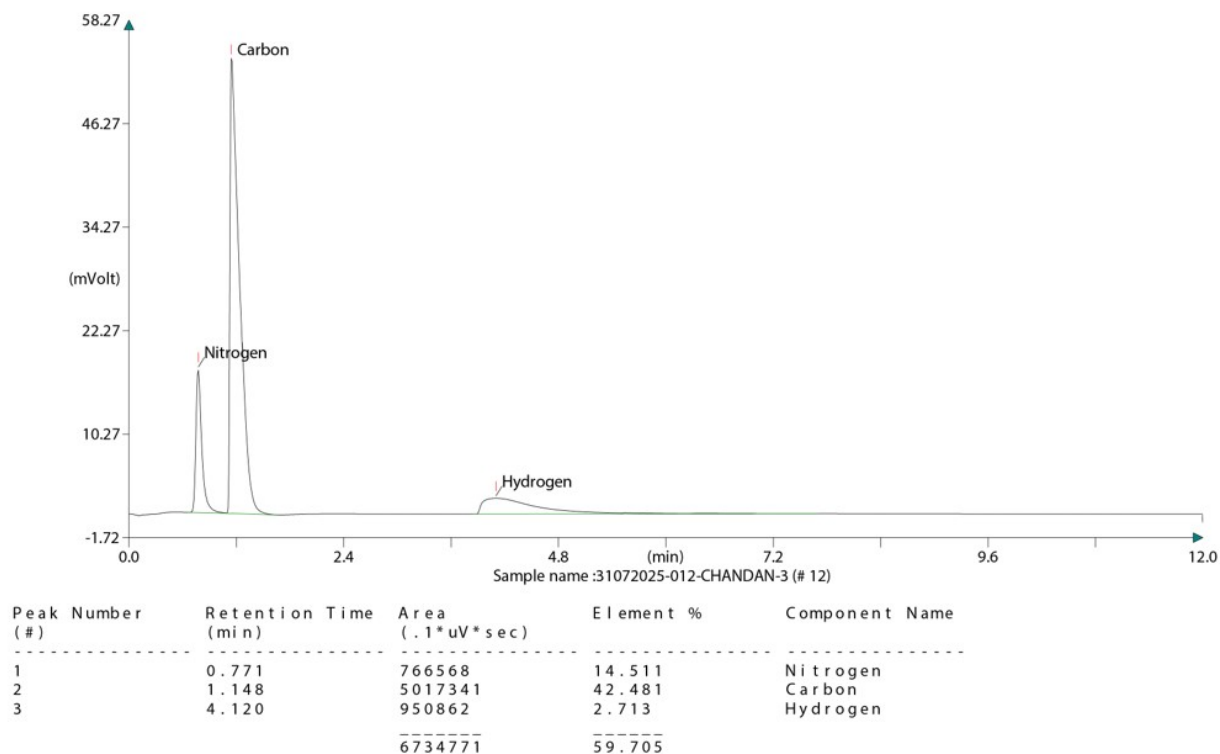

**Figure S4:** CHN elemental analysis chromatogram and composition data for C3. Experimental value elemental analysis: C, 42.481; H, 2.713; N, 14.511 and Theoretical value: C, 42.46; H, 2.72; N, 14.56.

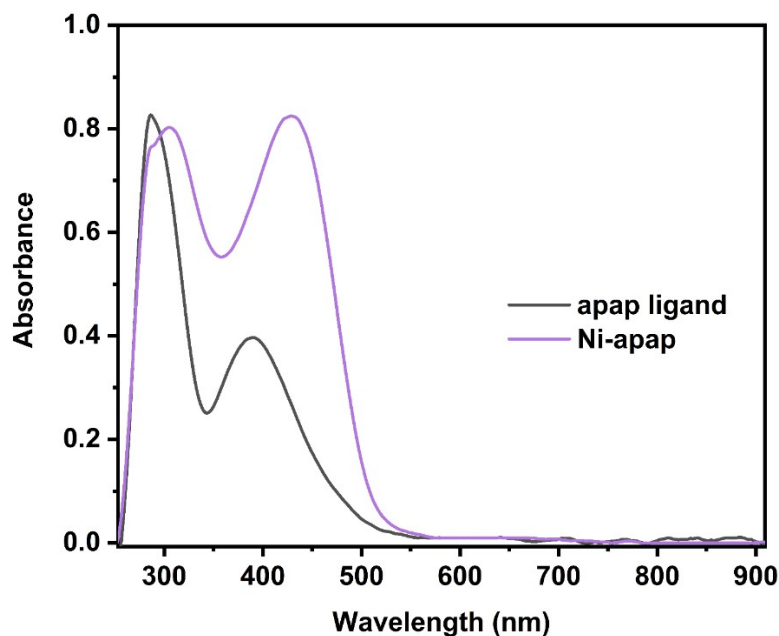

**Figure S5.** Optical spectral data of the **apap** ligand and the catalyst, Ni-apap (**C1**), with a concentration of 0.1 mM. This spectrum was recorded in the range 200–1000 nm at 298K in DMA solvent.

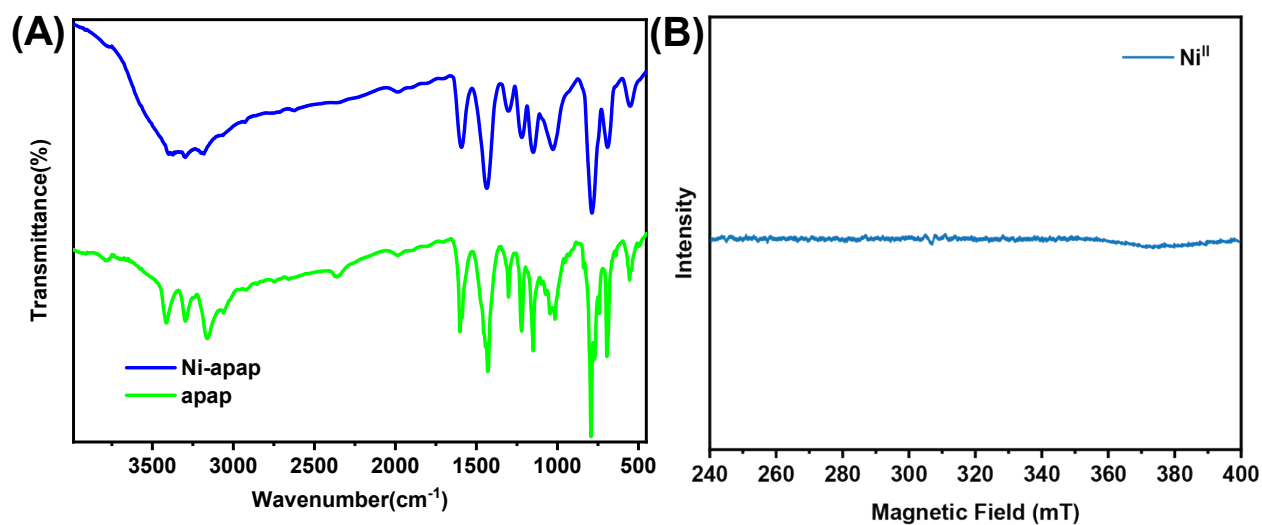

**Figure S6.** (A) FTIR Spectral data of **apap** ligand and Ni.apap (**C1**) complex. This spectrum was recorded in the range 4000–400  $\text{cm}^{-1}$  at 298K. (B) The EPR spectrum of  $\text{Ni}^{\text{II}}$  complex, the recorded in DMA solvent at 77 K.

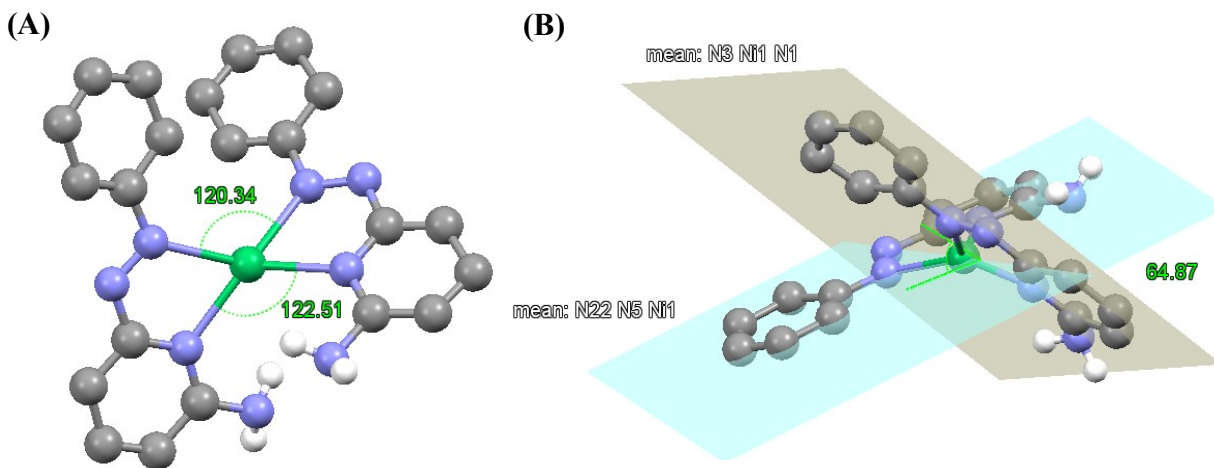

**Figure S7.** (A) DFT-optimized structure of C1. (B) Non-planarity of the co-ordinated apap ligand of the catalyst C1 (DFT optimized).

### 3.4 General Procedures for synthesis of Cu(I)-based photosensitizers.

For the synthesis of Cu-PS's, all reactions were carried out under an inert atmosphere of dry nitrogen by using standard Schlenk and vacuum line techniques. Solvents were dried by usual methods and distilled before use.

### 3.5 Synthesis of [(CuCl)<sub>2</sub>]{(o-PPh<sub>2</sub>)C<sub>6</sub>H<sub>4</sub>}C(O)N(H)CH<sub>2</sub>(C<sub>5</sub>H<sub>4</sub>N)}<sub>2</sub>-κ<sup>2</sup>-P,N]: Cu-PS-1

PN(H)N ligand (tridentate pincer ligand 2-(diphenylphosphaneyl)-N-(pyridine-2-ylmethyl)benzamide, {(o-PPh<sub>2</sub>)C<sub>6</sub>H<sub>4</sub>}C(O)N(H)CH<sub>2</sub>(C<sub>5</sub>H<sub>5</sub>N)}) (0.05 g, 0.1261 mmol) in 10 mL acetonitrile was added to a solution of CuCl (0.024 g, 0.1261 mmol) in 10 ml acetonitrile. The reaction mixture was allowed to stir at room temperature for 12 h. The solvent was completely removed under reduced pressure to afford complex **Cu-PS-1** as white solid. The resulting solid was washed with petroleum ether (2 x 20 mL) to afford analytically pure complex **Cu-PS-1**. Yield: 83% (20 mg). <sup>1</sup>H NMR (400 MHz, CDCl<sub>3</sub>) δ 8.91 – 8.86 (m, 2H), 7.85 (t, J = 5.6 Hz, 2H), 7.75 (td, J = 7.7, 1.7 Hz, 2H), 7.56 – 7.51 (m, 4H), 7.48 – 7.43 (m, 8H), 7.41 – 7.30 (m, 8H), 7.26 (ddd, J = 9.3, 5.6, 2.0 Hz, 10H), 6.94 (t, J = 7.8 Hz, 2H), 4.73 (d, J = 5.5 Hz, 4H). <sup>13</sup>C{<sup>1</sup>H} NMR (101 MHz, CDCl<sub>3</sub>) δ 169.5, 156.2, 141.9, 141.7, 137.8, 133.9, 133.8, 133.5, 130.4, 130.2, 130, 128.7, 128.6, 127.8, 123.9, 123.2, 44.8. <sup>31</sup>P{<sup>1</sup>H} NMR (162 MHz, CDCl<sub>3</sub>) δ -12.4.

### 3.6 Synthesis of [(CuBr)<sub>2</sub>]{(o-PPh<sub>2</sub>)C<sub>6</sub>H<sub>4</sub>}C(O)N(H)CH<sub>2</sub>(C<sub>5</sub>H<sub>4</sub>N)}<sub>2</sub>-κ<sup>2</sup>-P,N] : Cu-PS-2

PN(H)N ligand (tridentate pincer ligand 2-(diphenylphosphaneyl)-N-(pyridine-2-ylmethyl)benzamide, {(o-PPh<sub>2</sub>)C<sub>6</sub>H<sub>4</sub>C(O)N(H)CH<sub>2</sub>(C<sub>5</sub>H<sub>5</sub>N)}) (0.05 g, 0.1261 mmol) in 10 mL toluene was added to a solution of CuBr (0.024 g, 0.1261 mmol) in 10 ml toluene. The reaction mixture was refluxed at 110 °C for 12 h. The solvent was completely removed under reduced pressure to afford complex **Cu-PS-2** as white solid. The resulting solid was washed with petroleum ether (2 x 20 mL) to afford analytically pure complex **Cu-PS-2**. Yield: 85% (20 mg). <sup>1</sup>H NMR (400 MHz, CDCl<sub>3</sub>) δ 8.84 – 8.77 (m, 2H), 7.71 (ddd, J = 9.4, 6.5, 2.6 Hz, 4H), 7.59 – 7.28 (m, 21H), 7.25 (dd, J = 5.4, 3.3 Hz, 7H), 7.24 – 7.13 (m, 11H), 6.90 (t, J = 7.8 Hz, 2H), 4.69 (d, J = 5.5 Hz, 4H), 1.59 (s, 6H). <sup>13</sup>C{<sup>1</sup>H} NMR (126 MHz, CDCl<sub>3</sub>) δ 169.8, 156.8, 156.8, 149.5, 142.6, 142.5, 138, 134.2, 134.1, 134, 132.2, 130.6, 130.4, 130.3, 130.2, 129.4, 129, 128.9, 128.6, 125.6, 124.2, 123.4, 45.4, 21.8. <sup>31</sup>P{<sup>1</sup>H} NMR (162 MHz, CDCl<sub>3</sub>) δ -13.

### 3.7 Synthesis of [(CuI)<sub>2</sub>]{(o-PPh<sub>2</sub>)C<sub>6</sub>H<sub>4</sub>}C(O)N(H)CH<sub>2</sub>(C<sub>5</sub>H<sub>4</sub>N)}<sub>2</sub>-κ<sup>2</sup>-P,N] : Cu-PS-3

PN(H)N ligand (tridentate pincer ligand 2-(diphenylphosphaneyl)-N-(pyridine-2-ylmethyl)benzamide, {(o-PPh<sub>2</sub>)C<sub>6</sub>H<sub>4</sub>C(O)N(H)CH<sub>2</sub>(C<sub>5</sub>H<sub>5</sub>N)}) (0.05 g, 0.1261 mmol) in 10 mL dichloromethane was added to a solution of CuI (0.024 g, 0.1261 mmol) in 10 ml dichloromethane. The reaction mixture was allowed to stir at room temperature for 12 h. The solvent was completely removed under reduced pressure to afford complex **Cu-PS-3** as white solid. The resulting solid was washed with petroleum ether (2 x 20 mL) to afford analytically pure complex **Cu-PS-3**. Yield: 88% (20 mg). <sup>1</sup>H NMR (400 MHz, CDCl<sub>3</sub>) δ 8.75 (s, 2H), 7.91 (d, J = 7.7 Hz, 1H), 7.74 – 7.68 (m, 3H), 7.68 – 7.66 (m, 1H), 7.51 – 7.48 (m, 5H), 7.47 – 7.42 (m, 9H), 7.40 – 7.34 (m, 9H), 7.33 – 7.28 (m, 8H), 6.93 (t, J = 7.9 Hz, 2H), 4.71 (d, J = 5.2 Hz, 4H). <sup>13</sup>C{<sup>1</sup>H} NMR (101 MHz, DMSO) δ 170.1, 156.4, 148.8, 138, 133.4, 133.3, 132.1, 131.8, 130.4, 128.7, 128.6, 127.3, 123.7, 123.1, 44.4. <sup>31</sup>P{<sup>1</sup>H} NMR (162 MHz, DMSO) δ -13.1.

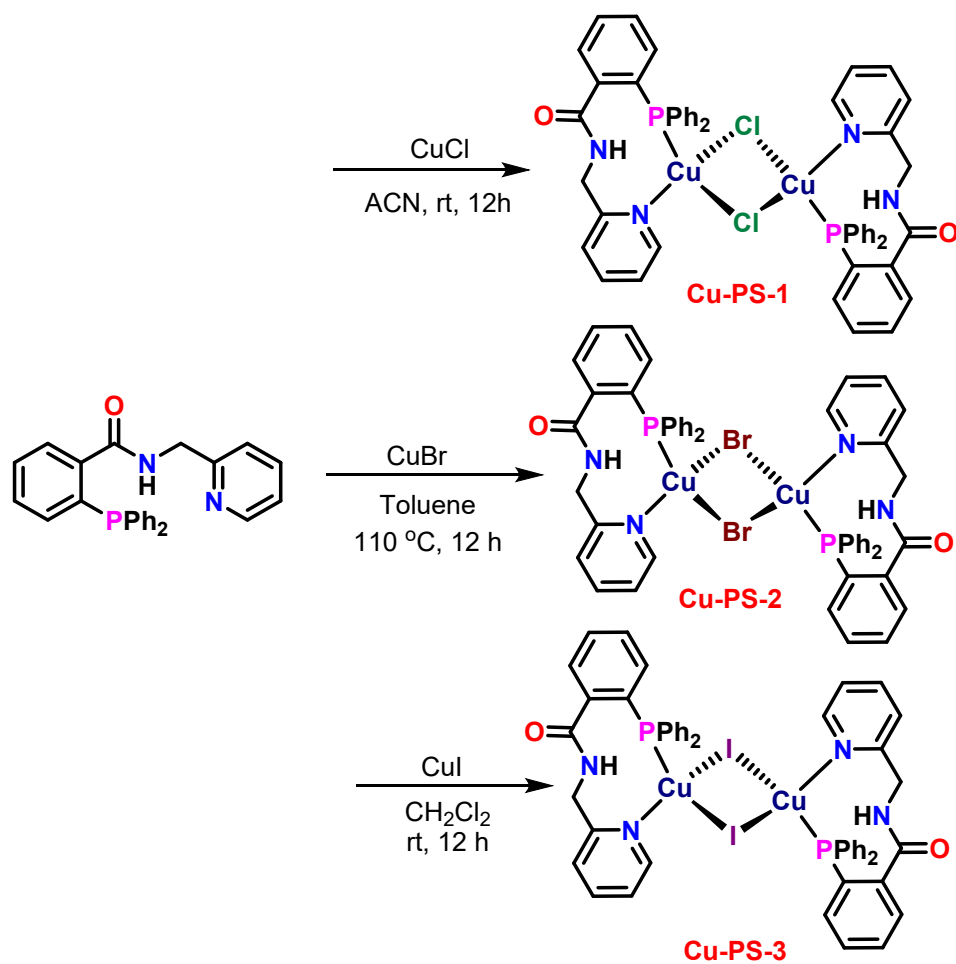

**Scheme S1:** Synthesis of Cu-PS-1, Cu-PS-2, and Cu-PS-3.

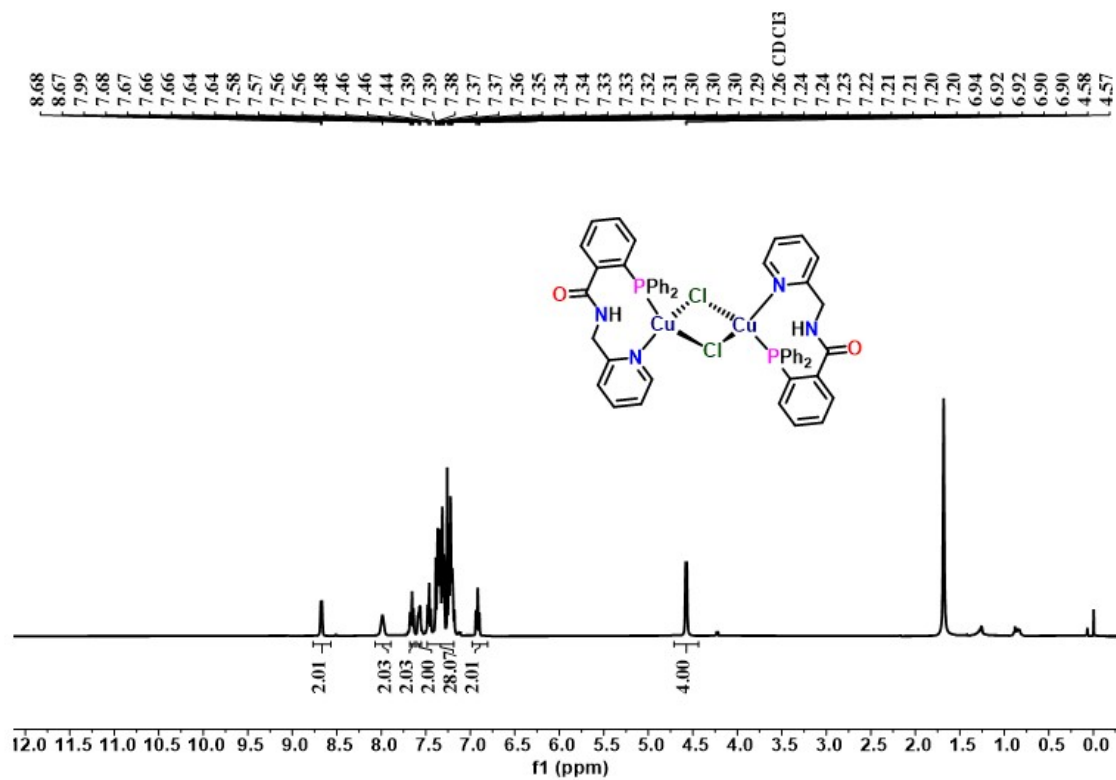

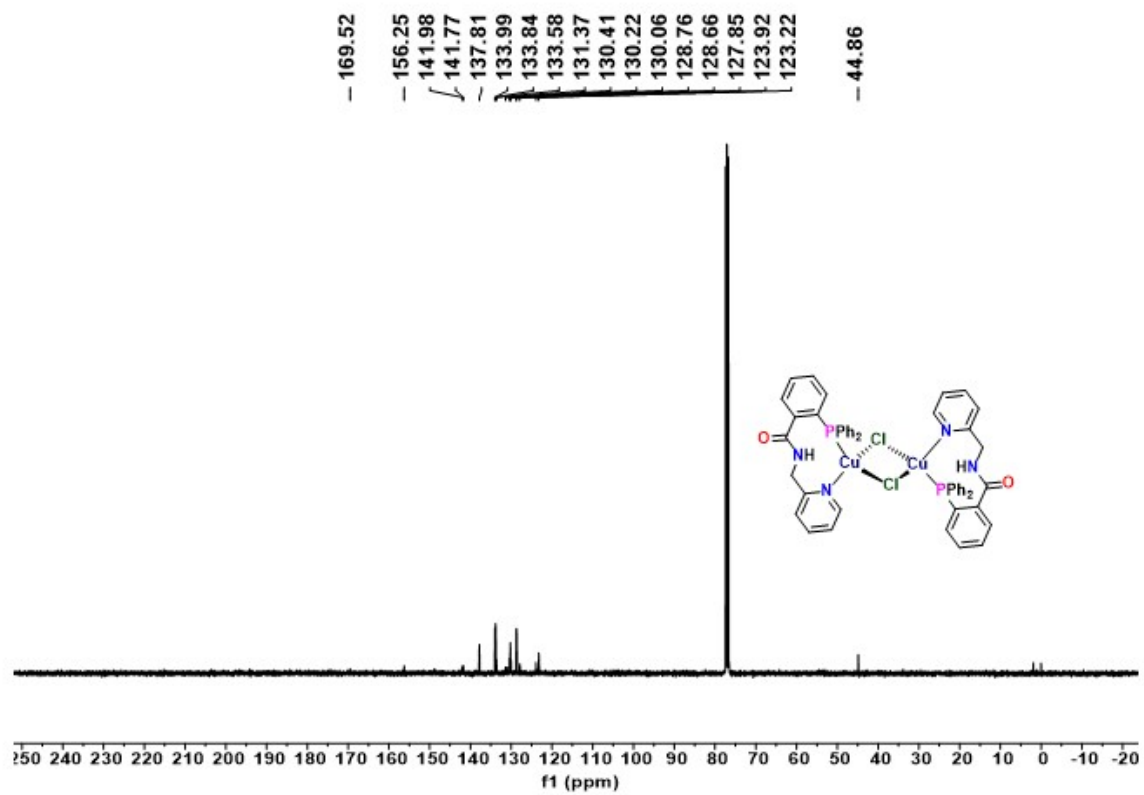

**Figure S9.**  $^{13}\text{C}\{^1\text{H}\}$  NMR spectrum of **Cu-PS-1** in  $\text{CDCl}_3$  (400 MHz).

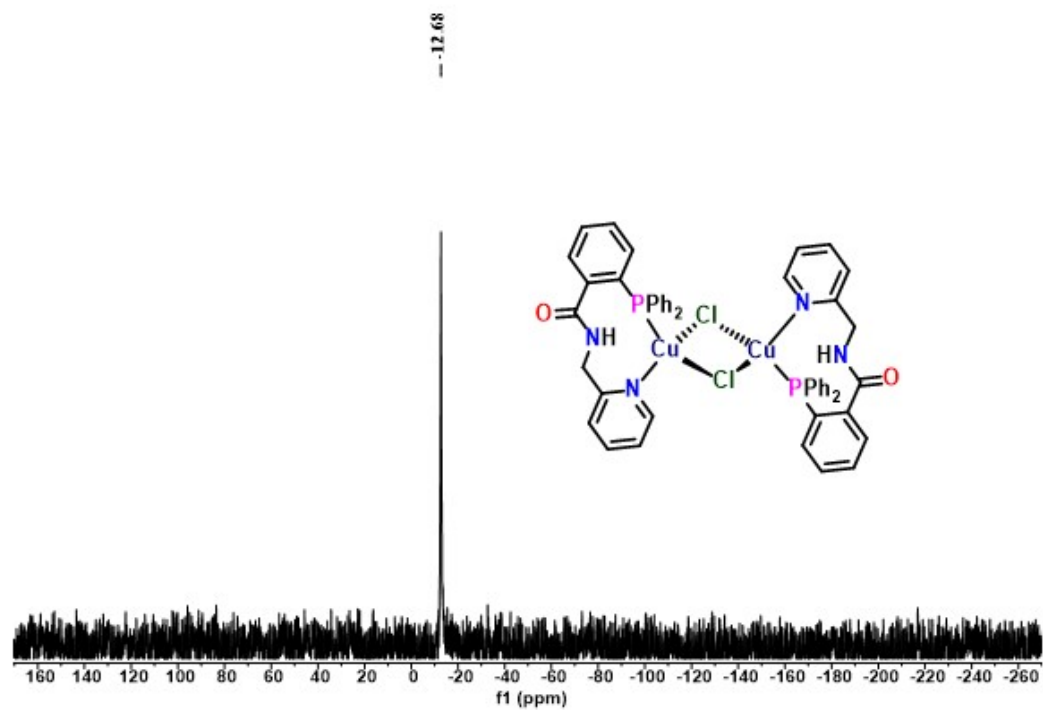

**Figure S10.**  $^{31}\text{P}\{^1\text{H}\}$  NMR spectrum of **Cu-PS-3** in  $\text{DMSO-}d_6$  (400 MHz).

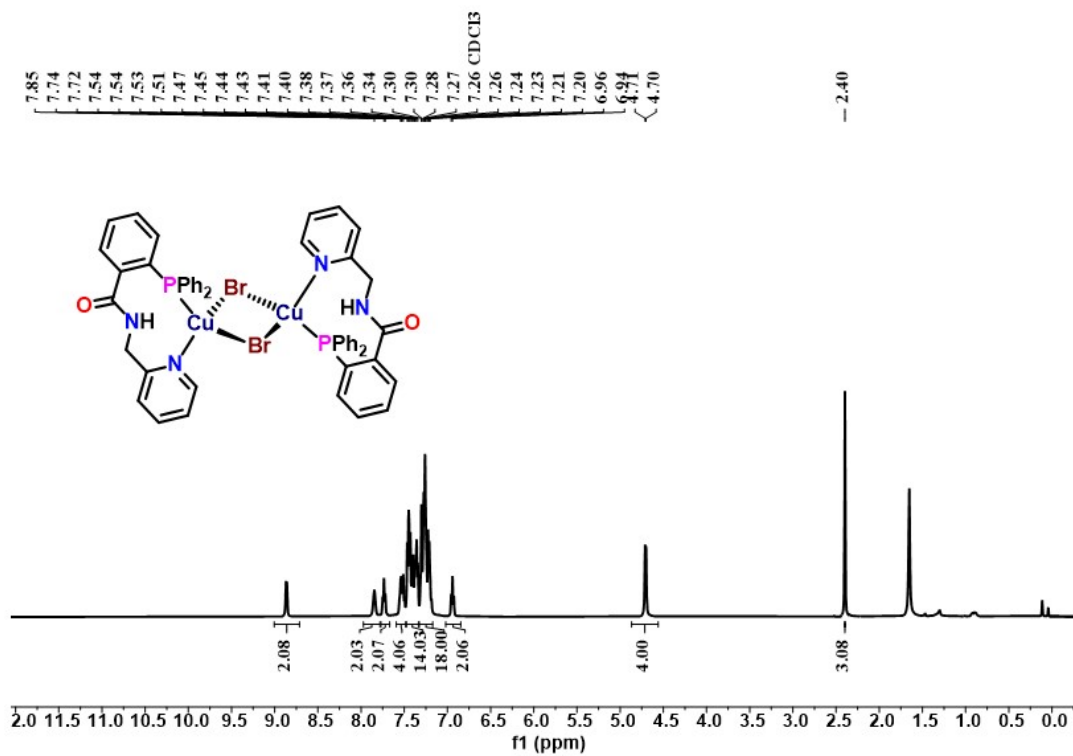

**Figure S11.**  $^1\text{H}$  NMR spectrum of Cu-PS-2 in  $\text{CDCl}_3$  (400 MHz).

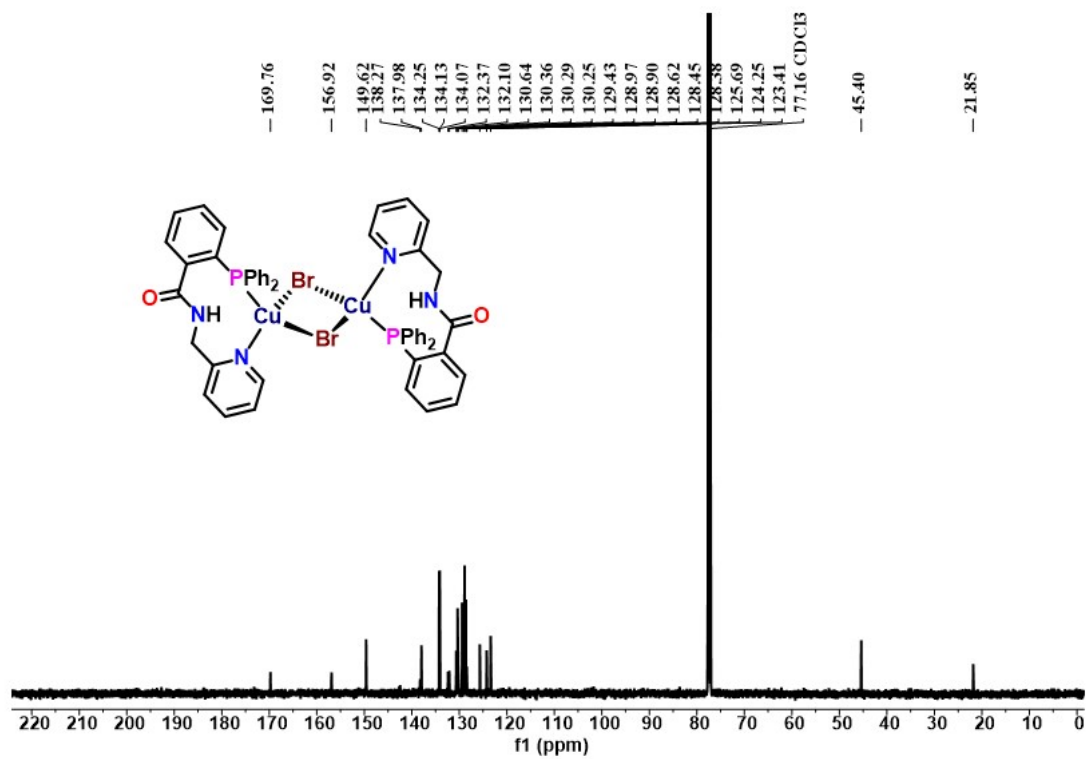

**Figure S12.** <sup>13</sup>C{<sup>1</sup>H} NMR spectrum of Cu-PS-2 in CDCl<sub>3</sub> (400 MHz).

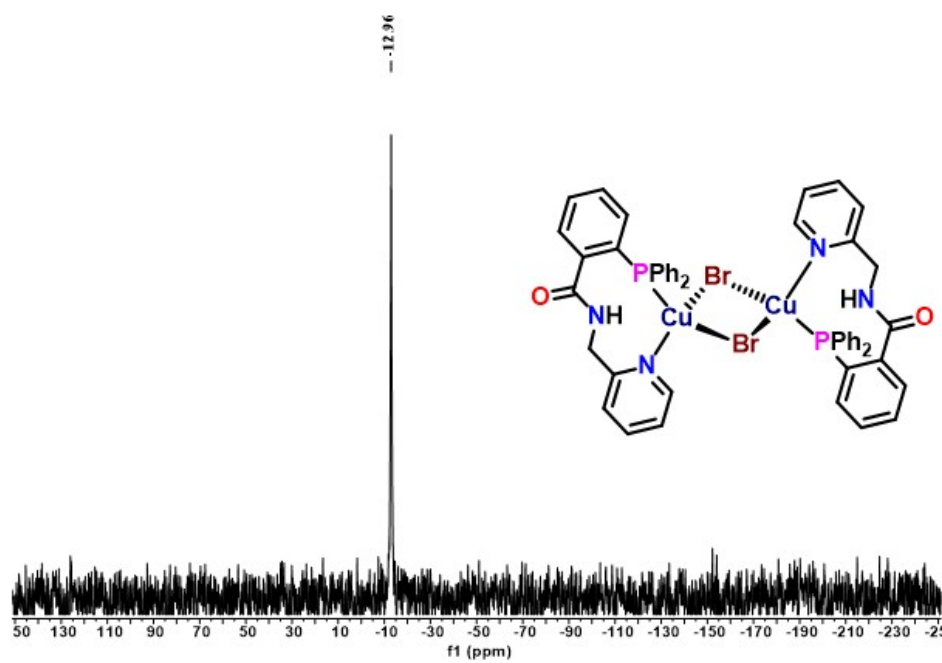

**Figure S13.**  $^{31}\text{P}\{^1\text{H}\}$  NMR spectrum of **Cu-PS-3** in  $\text{DMSO-}d_6$  (400 MHz).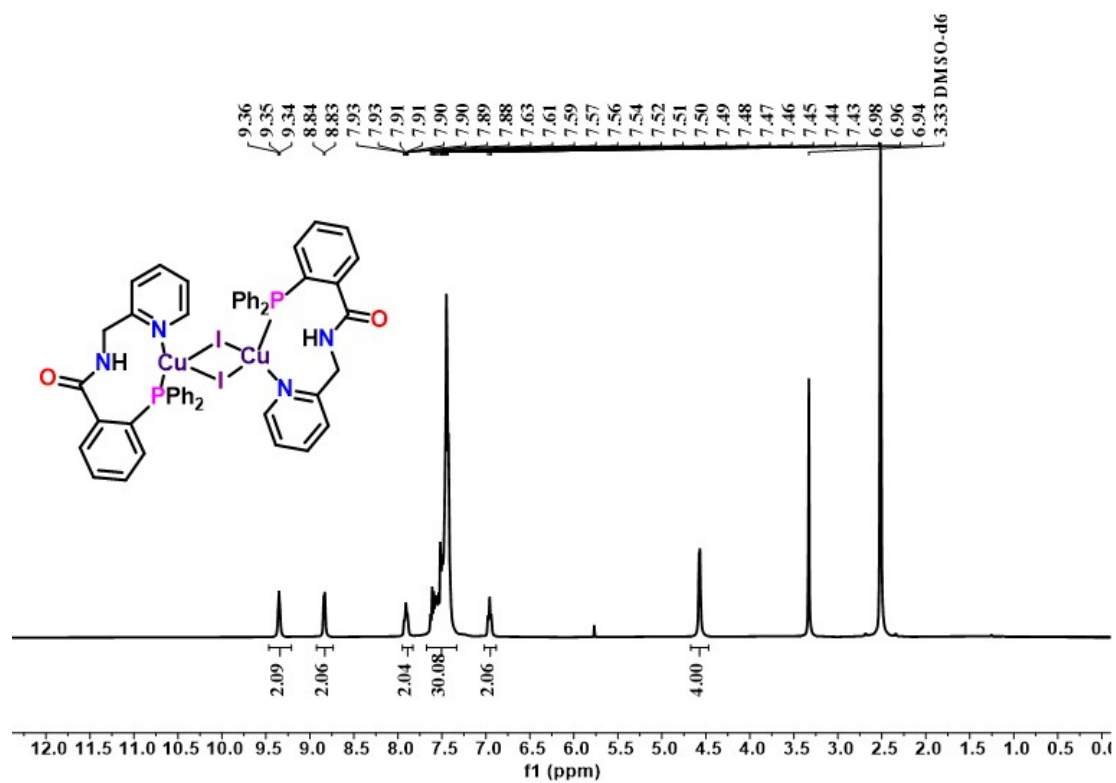**Figure S14.**  $^1\text{H}$  NMR spectrum of **Cu-PS-3** in  $\text{CDCl}_3$  (400 MHz).

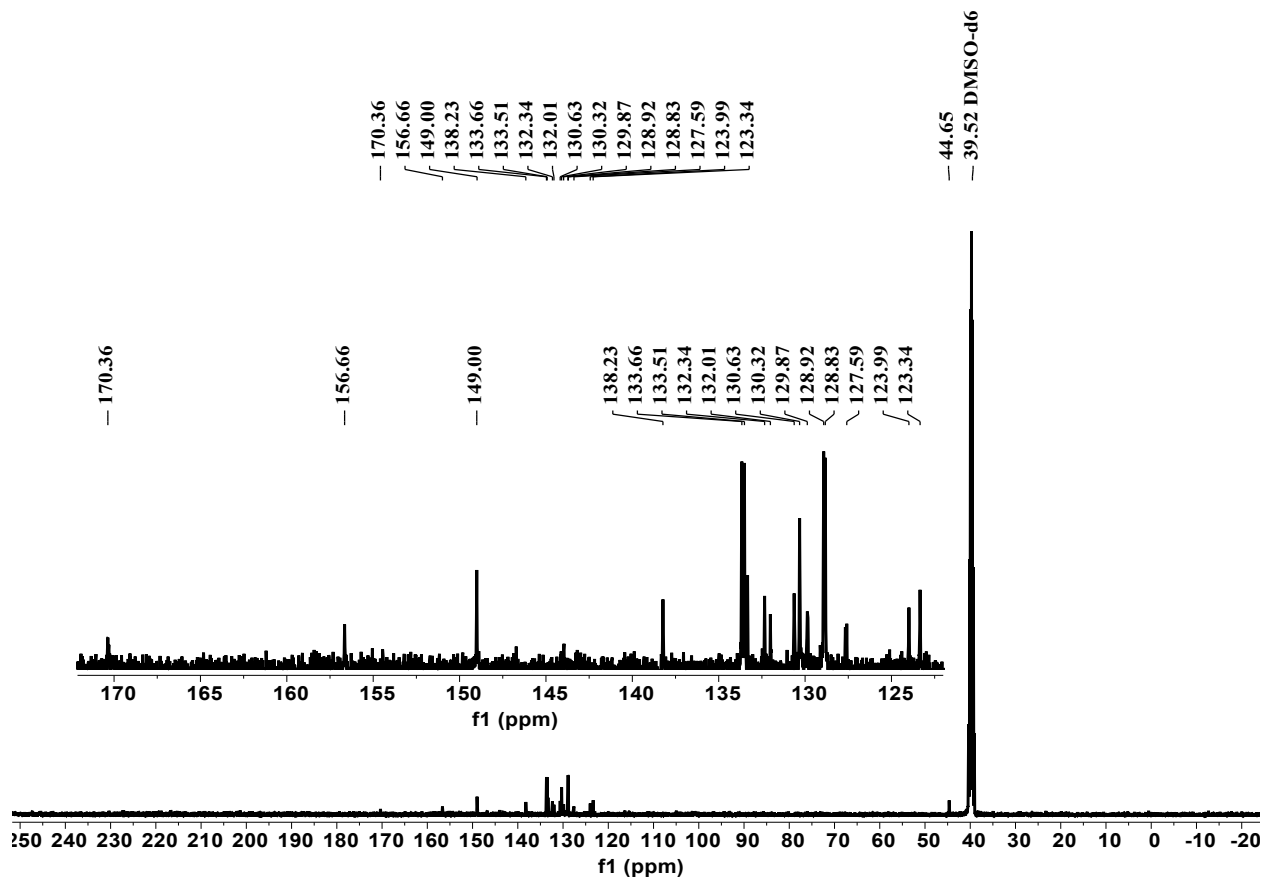

Figure S15.  $^{13}\text{C}\{^1\text{H}\}$  NMR spectrum of Cu-PS-2 in  $\text{CDCl}_3$  (101 MHz).

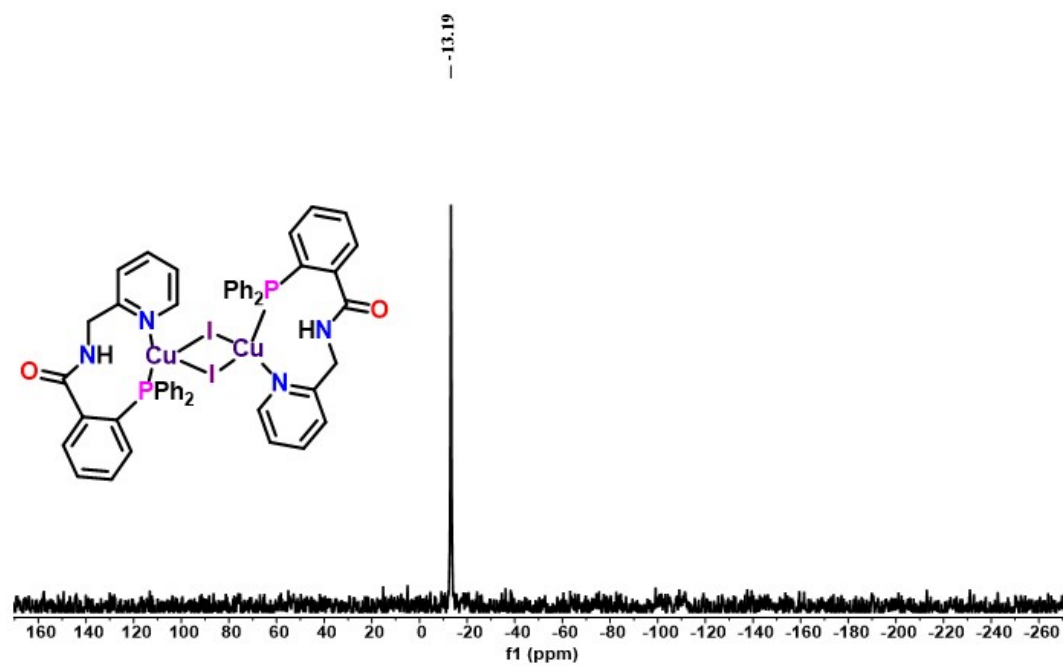

**Figure S16.**  $^{31}\text{P}\{^1\text{H}\}$  NMR spectrum of **Cu-PS-3** in  $\text{DMSO-}d_6$  (162 MHz).

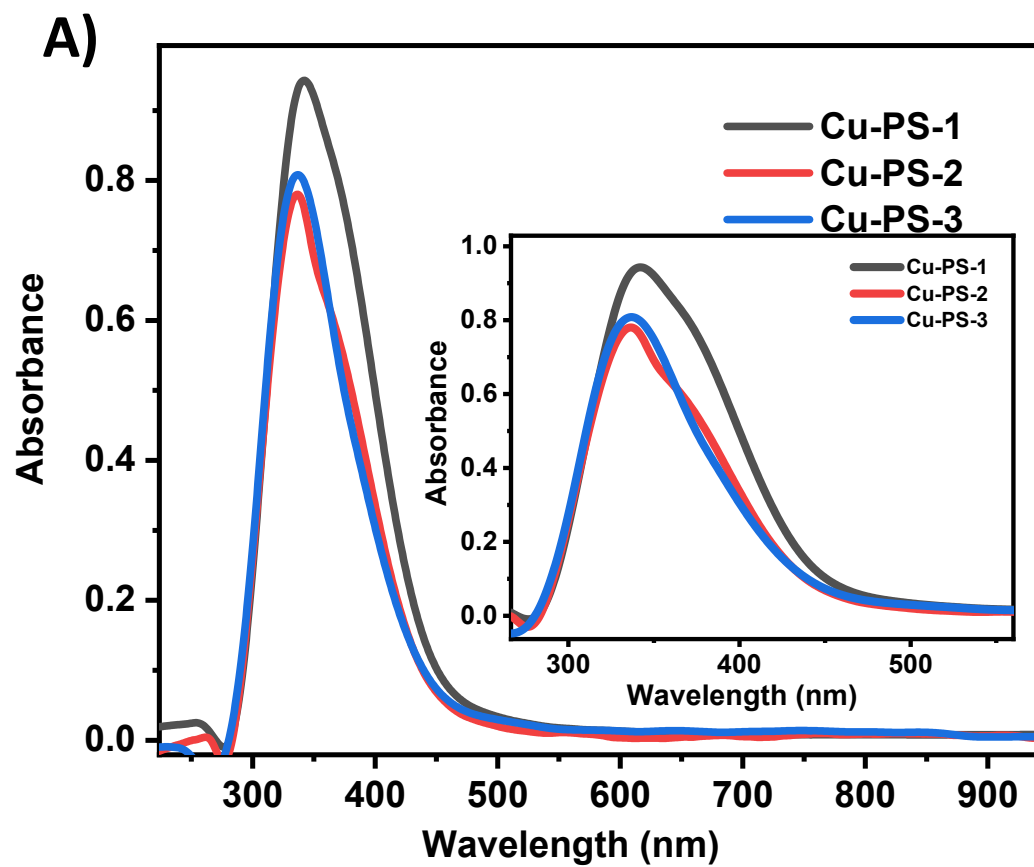

**Figure S17:** Optical spectral data of the copper photosensitizers (25  $\mu\text{M}$ ) (Cu-PS-1, Cu-PS-2, and Cu-PS-3). This spectrum was recorded in DMA in the range 190 –1000 nm at 298K.

**Electrochemistry of all the Cu(I) photosensitizers**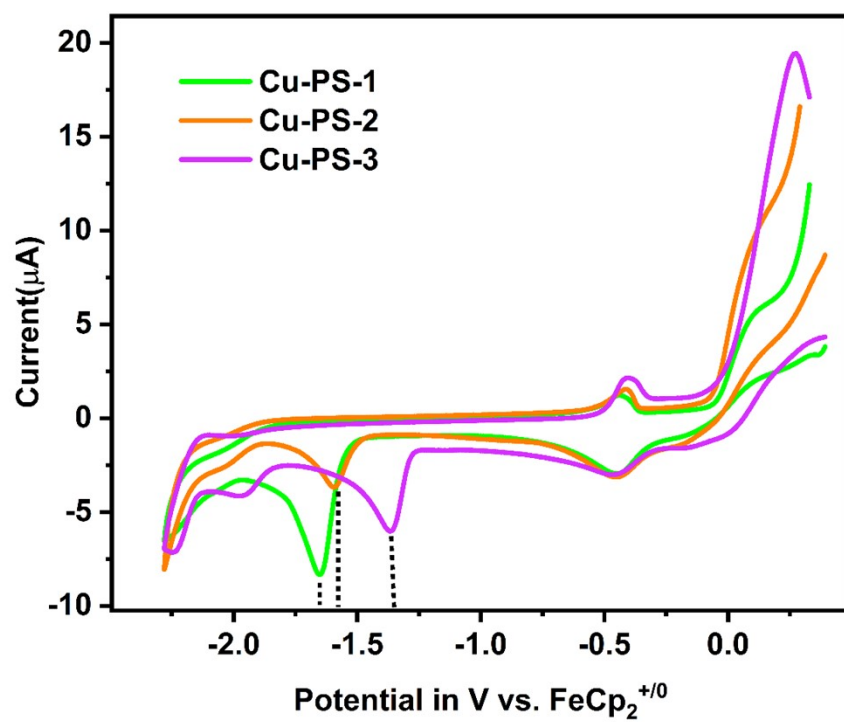

**Figure S18.** Cyclic Voltammetry study of copper photosensitizers (Cu-PS-1, Cu-PS-2, Cu-PS-3) complex under argon atmosphere in DMA at 298 K temperature.

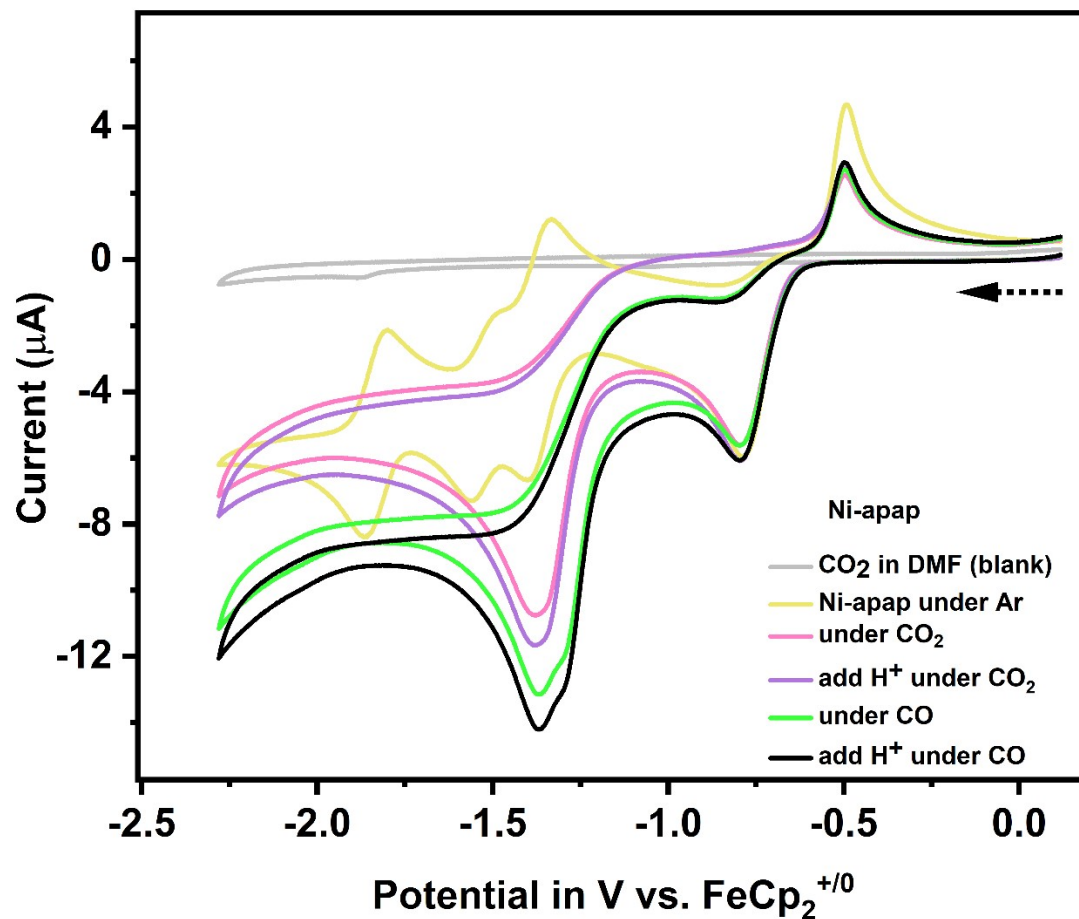

**Figure S19.** Cyclic Voltammetry study of C1 complex under argon atmosphere (yellow), CO<sub>2</sub> atmosphere (pink), CO<sub>2</sub> atmosphere in presence of proton source (purple), under CO atmosphere (green), and CO atmosphere in presence of proton source (black) in DMA at 298 K temperature. The arrow indicates the origin and direction of the scan.

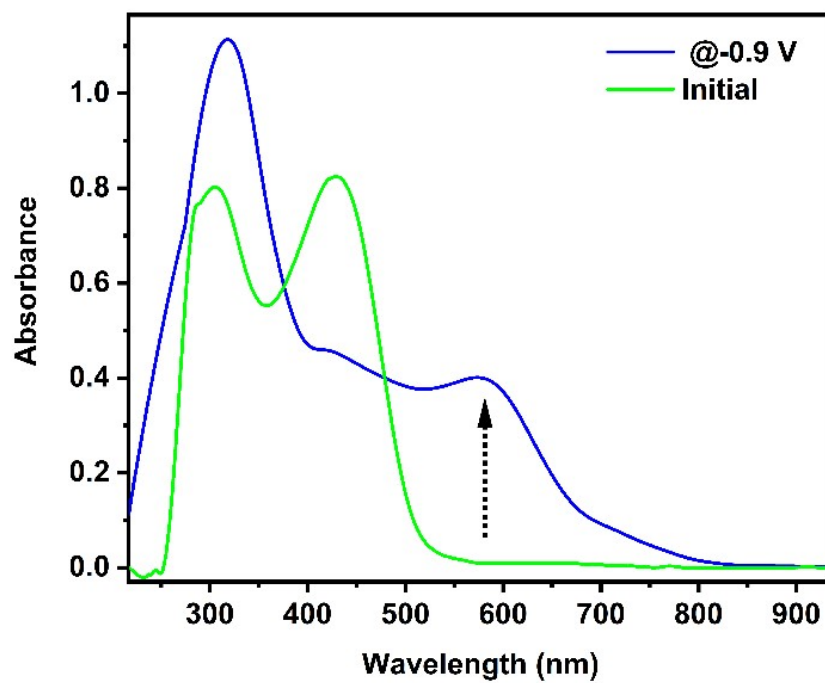

**Figure S20.** UV- visible spectra of the **C1** under electrochemical condition at no potential (green) and at -0.9 V vs.  $\text{FeCp}_2^{+/0}$  potential (blue). These spectra was recorded in the range 190 –1000 nm at 298K.

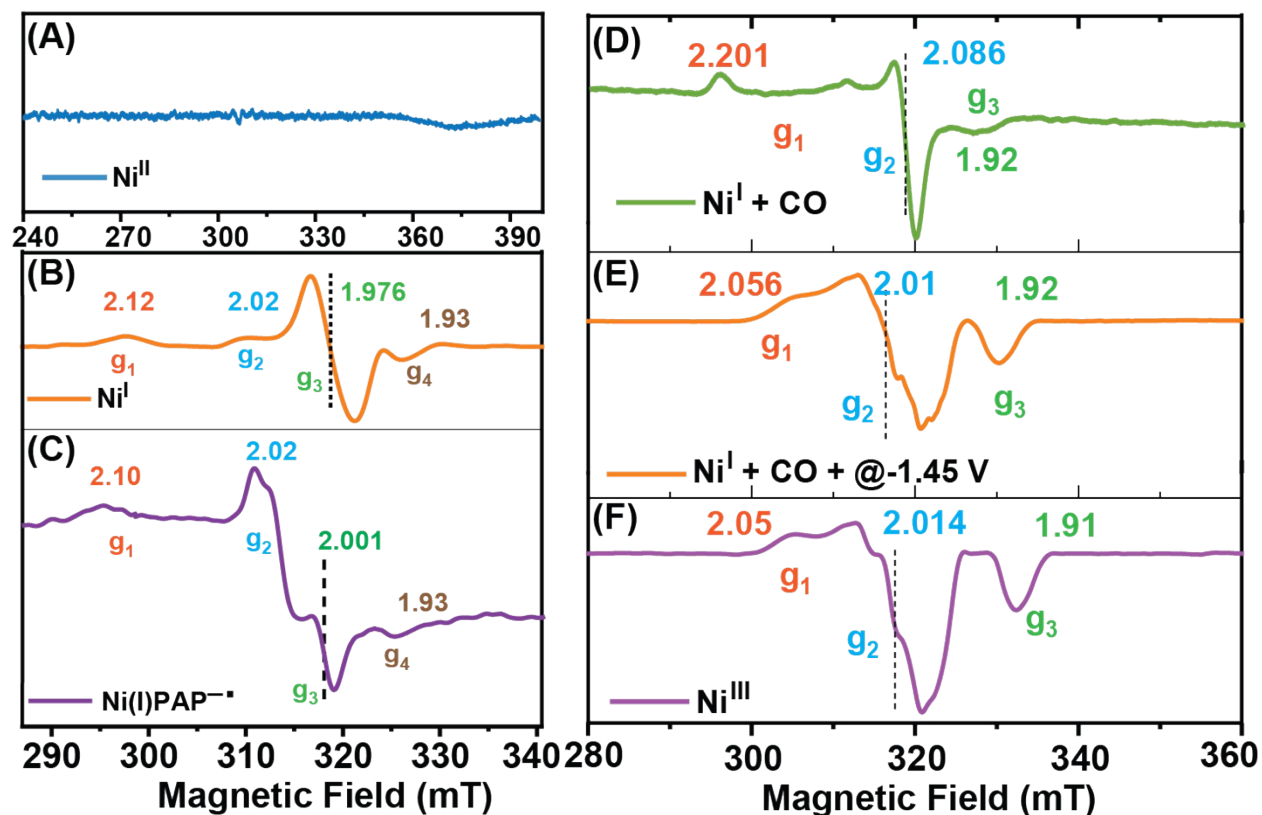

**Figure S21.** The experimental EPR spectra of with the concentration of 3 mM catalyst (A)  $\text{Ni}^{\text{II}}$  (B)  $\text{Ni}^{\text{I}}$  (one electron reduction:  $\text{Ni}^{\text{II}} +$  at the applied potential  $-0.9$  V vs.  $\text{FeCp}_2^{+/0}$ ), (C)  $\text{Ni}^{\text{I}}\text{PAP}^{--}$  (two-electron reduction:  $\text{Ni}^{\text{II}} +$  at the applied potential  $-1.3$  V vs.  $\text{FeCp}_2^{+/0}$ ). (D) The change in EPR spectra under CO-saturated Ni(I)-apap catalyst, after electrochemical one-electron reduction of N(II)-apap without applying any potential (E) The change in the EPR spectra under CO at the applied potential  $-1.5$  V vs.  $\text{FeCp}_2^{+/0}$  starting from one electron reduces the  $\text{Ni}^{\text{I}}$  system. (F) The change in EPR spectrum after one-electron oxidation of the C1 complex by CAN. All data recorded in DMA solvent at 77 K.

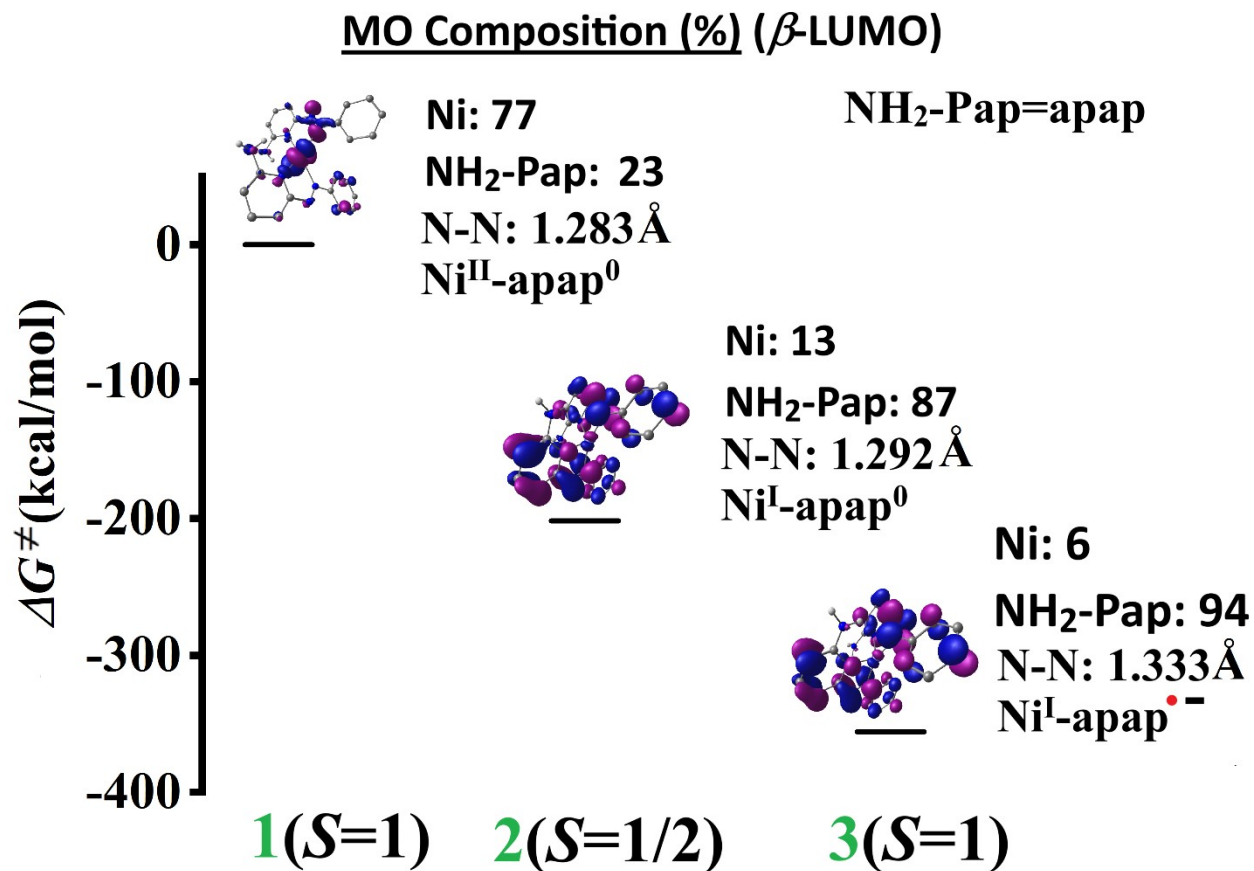

**Figure S22.** Composition and Energies of Selected Molecular Orbitals of Catalyst C1.

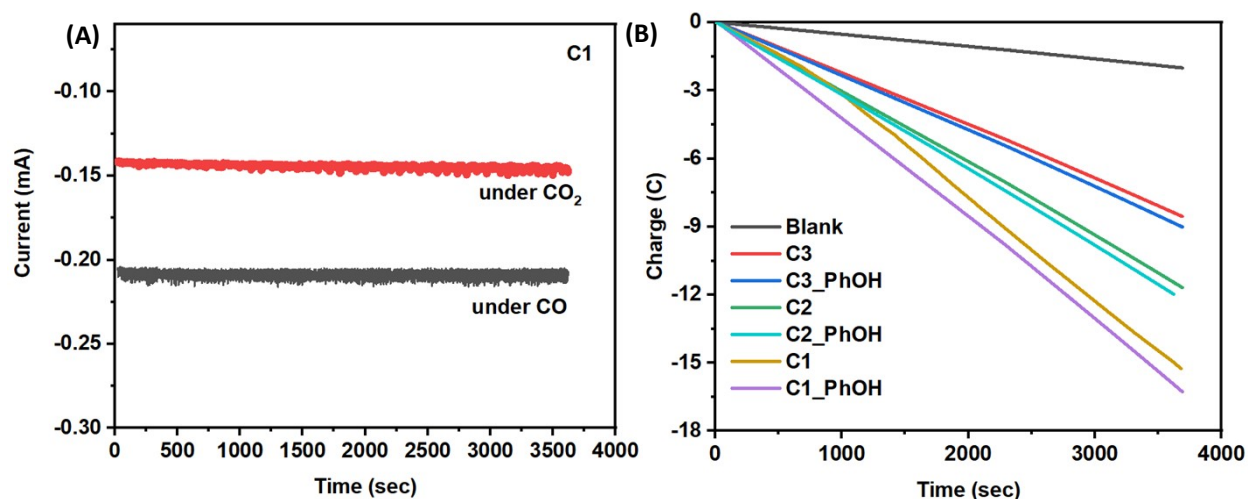

**Figure S23.** (A) Current vs. Time plot was recorded during the bulk (with phenol) electrolysis of Ni-complex performed at -1.6 V under 1 atm CO<sub>2</sub> and -1.5 V under 1 atm CO vs. FeCp<sub>2</sub><sup>+0</sup> in DMA. (B) The charge vs. time for all complexes, C1, C2 and C3, with and without phenol.

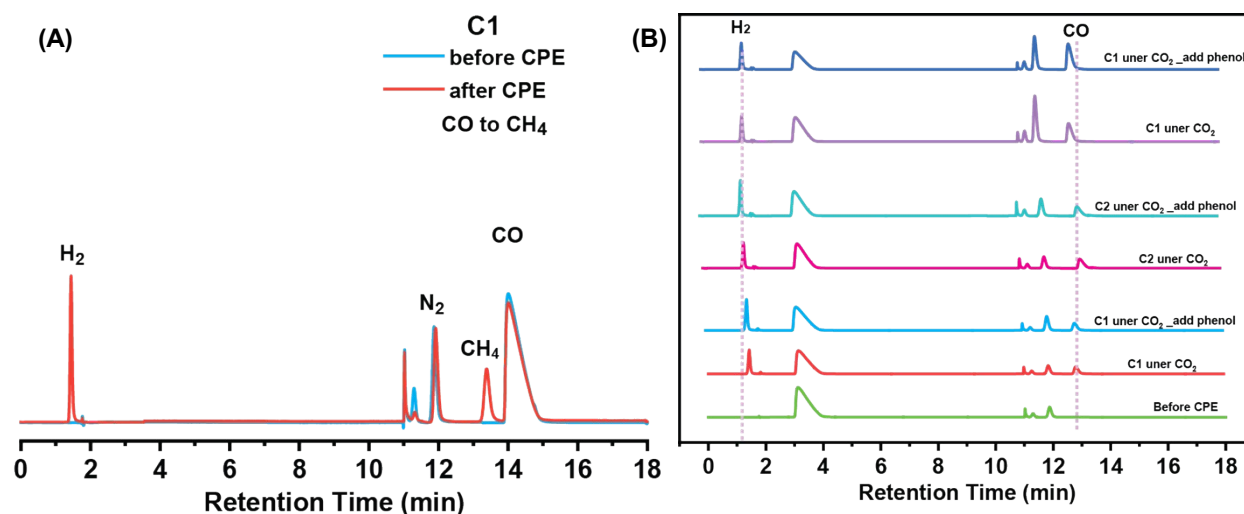

**Figure S24.** The gas chromatography data recorded for the headspace gas analyte generated during the bulk electrolysis of C1 at (A) -1.5 V vs. Fc<sup>+0</sup> in DMA under 1 atm saturated CO and at (B) The gas chromatography data recorded for the headspace gas analyte generated during the bulk electrolysis of all the three catalyst C1, C2 and C3 in DMA under 1 atm saturated CO<sub>2</sub> condition.

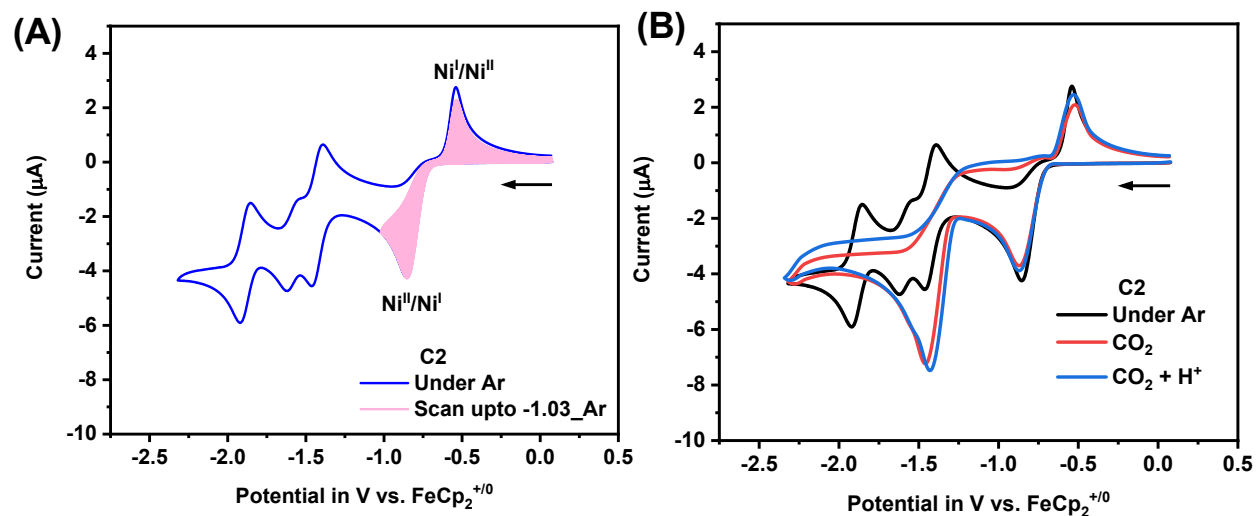

**Figure S25.** Cyclic Voltammetry (CV) study of C2 (0.5 mM) complex (A) under argon atmosphere full-scan (blue trace): scan till -1.03 V (violet trace) (B) under Ar (black trace): under  $\text{CO}_2$  atmosphere (red trace),  $\text{CO}_2$  atmosphere in presence of proton source (blue trace) in DMA at 298 K temperature. The arrow indicates the origin and direction of the scan.

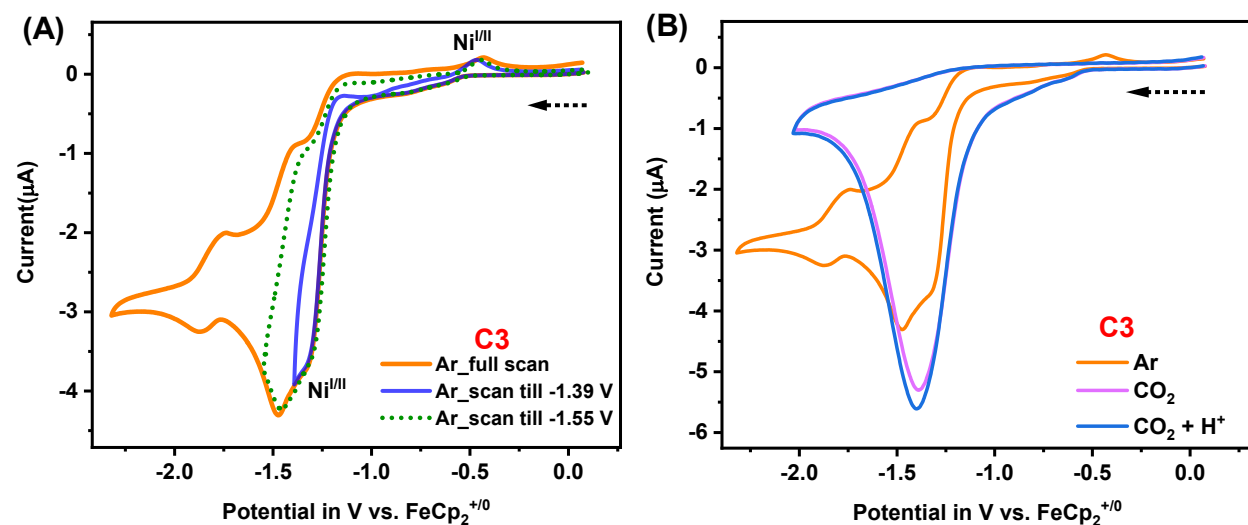

**Figure S26.** Cyclic Voltammetry (CV) study of C3 (0.5 mM) complex (A) under argon atmosphere full-scan (orange trace): scan till -1.39 V (blue trace): scan up to -1.55 V (green trace) (B) under Ar (orange trace): under  $\text{CO}_2$  atmosphere (violet trace),  $\text{CO}_2$  atmosphere in presence of

proton source (blue trace) in DMA at 298 K temperature. The arrow indicates the origin and direction of the scan.

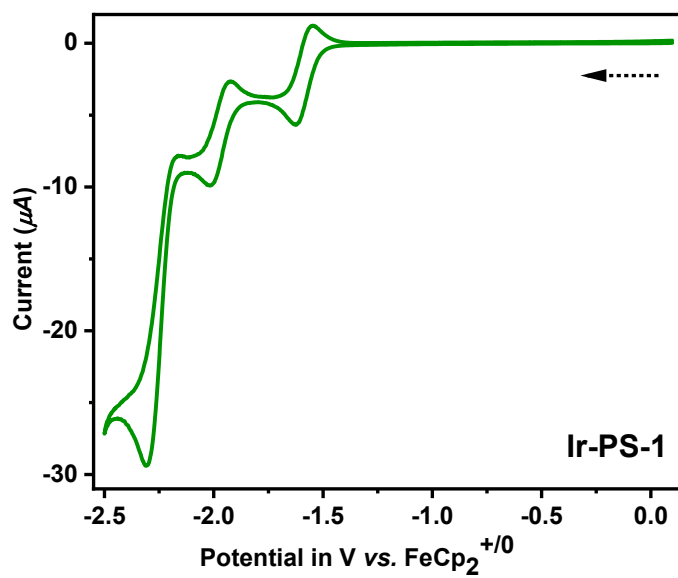

**Figure S27.** Shows Cyclic Voltammetry (CV) study of **Ir-PS-1** (1.0 mM) complex under Argon atmosphere in DMA at 298 K temperature with scan rate of 100 mV/s.

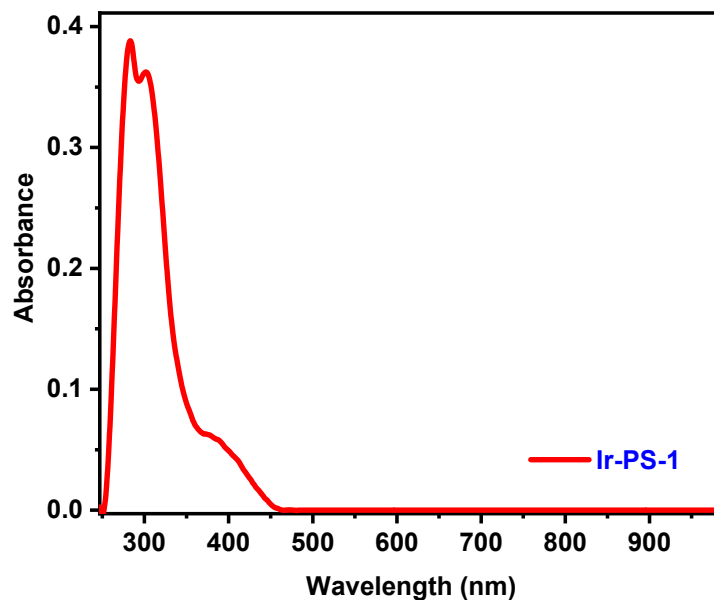

**Figure S28.** Shows Optical spectral data of the Ir-PS-1 (20  $\mu\text{M}$ ). This spectrum was recorded in the range 150 –1050 nm at 298 K in DMA solvent.

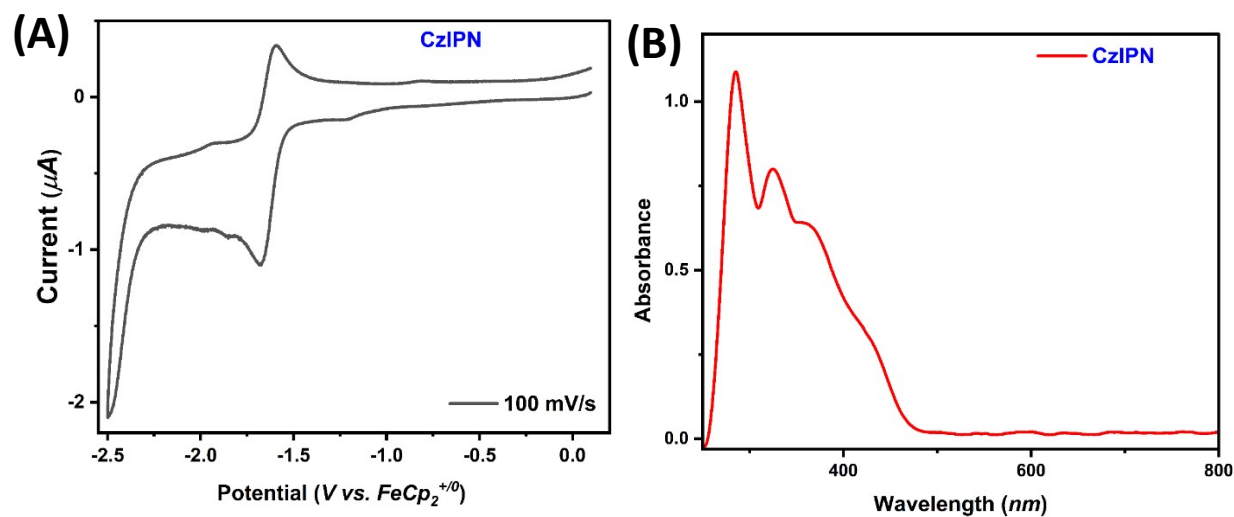

**Figure S29.** (A) shows Cyclic Voltammetry (CV) study of CzIPN (0.5 mM) complex under Argon atmosphere in DMA at 298 K temperature with scan rate of 100 mV/s. (B) shows Optical spectral data of the CzIPN (25  $\mu\text{M}$ ). This spectrum was recorded in the range 15 –1050 nm at 298K in DMA solvent.

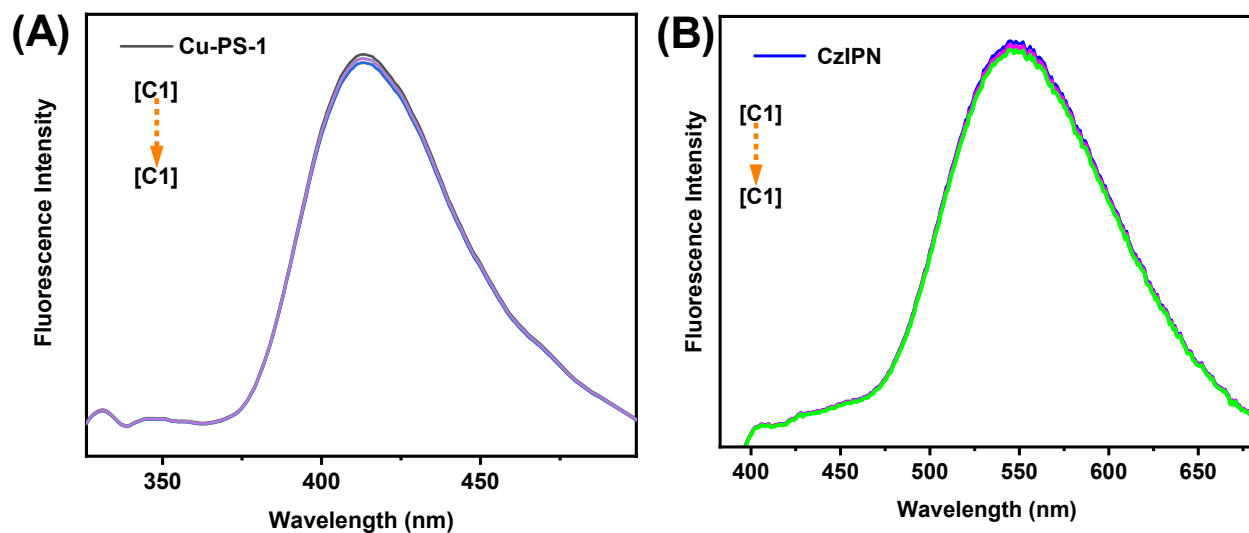

**Figure S30.** Changes in emission spectra of (A) Cu-PS-1 and (B) CzIPN on gradually increasing C1 (2-12 mM) concentration in DMA solution at 298 K, respectively.

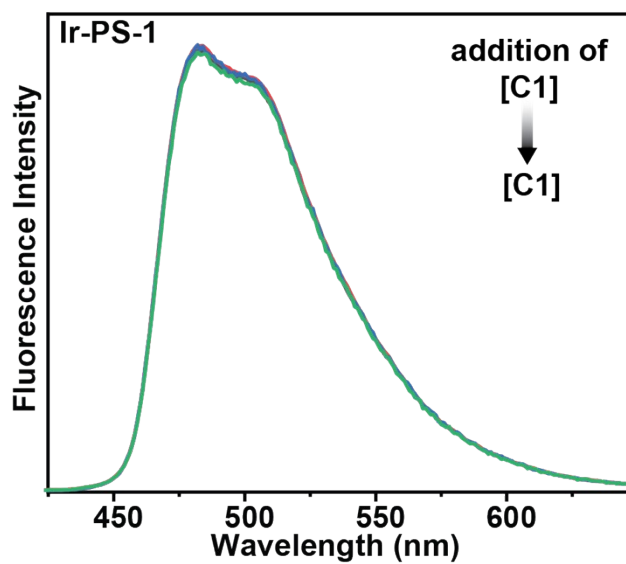

**Figure S31.** Changes in emission spectra of Ir-PS-1 on gradually increasing C1 (2-12 mM) concentration in DMA solution at 298 K.

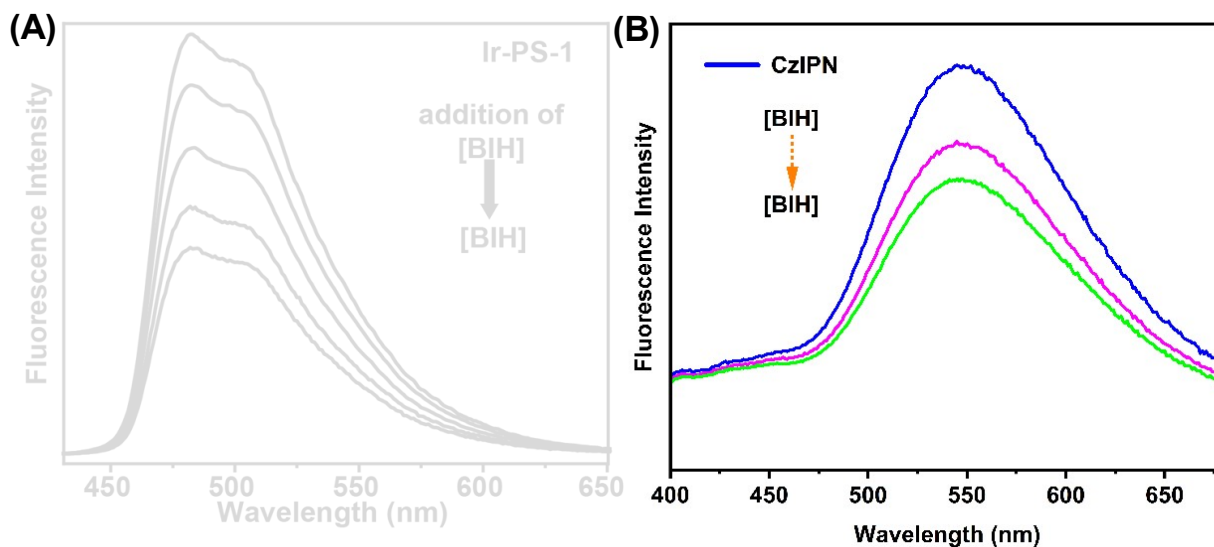

**Figure S32.** The variation in the emission spectra of (A) Ir-PS-1 and (B) CzIPN upon gradually increasing concentration of BIH (0.2 to 10 mM) in DMA solution at 298 K.

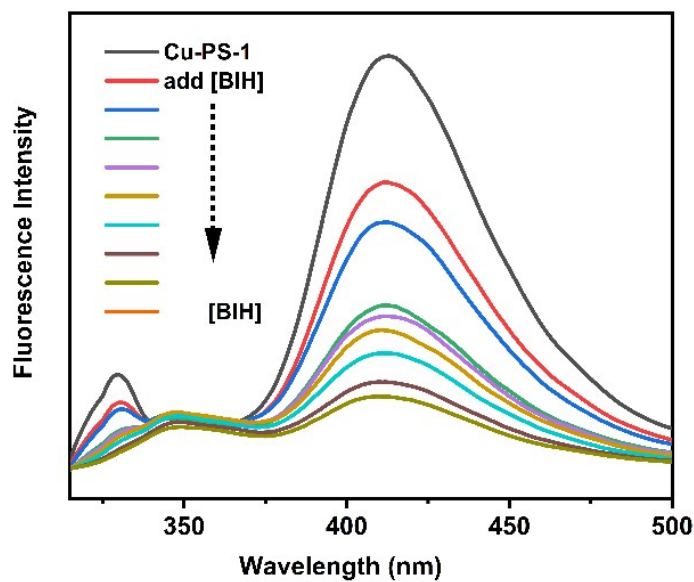

**Figure S33.** The variation in the emission spectra of Cu-PS-1 (0.5 mM) upon gradually increasing concentration of BIH (0.2 to 12 mM) in DMA solution at 298 K.

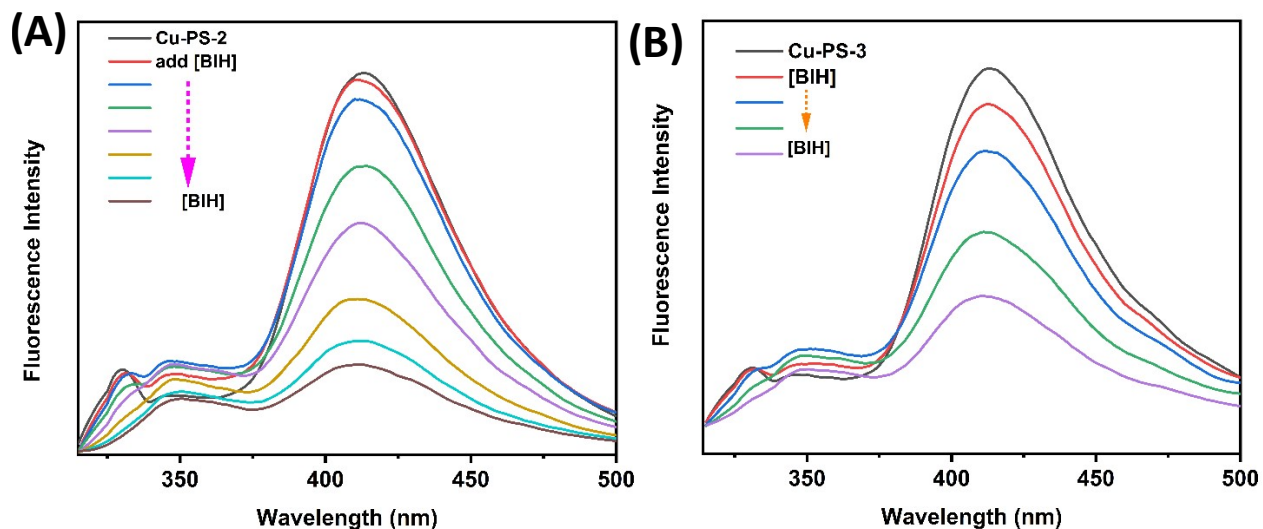

**Figure S34.** The variation in the emission spectra of (A) Cu-PS-2 (0.5 mM) and (B) Cu-PS-3 (0.5 mM) upon gradually increasing concentration of BIH (0.2 to 12 mM) in DMA solution at 298 K.

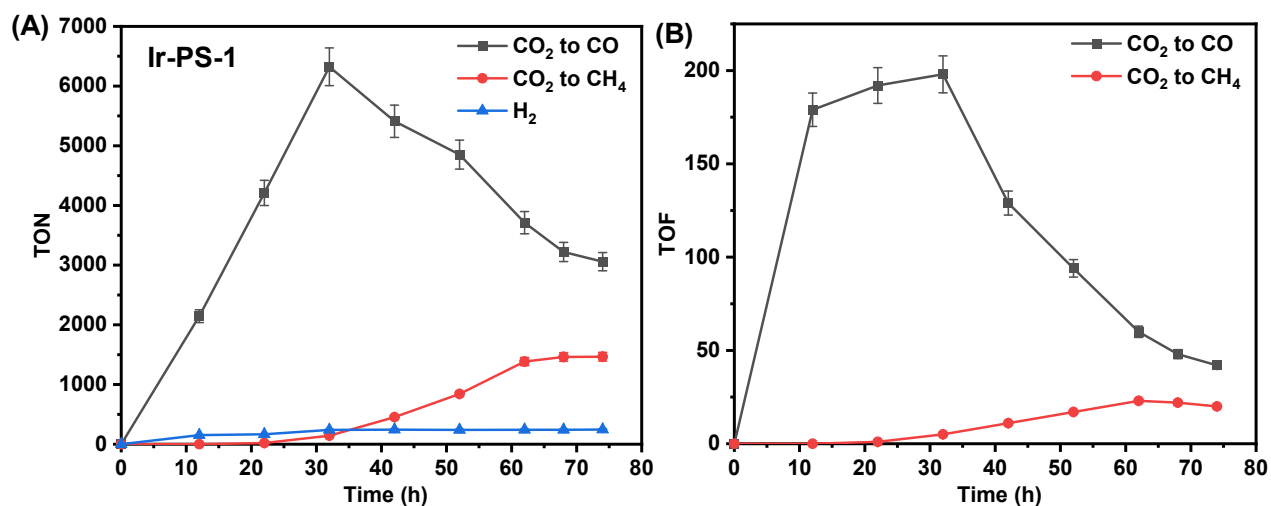

**Figure S35.** Progress of photocatalytic CO (orange), CH<sub>4</sub> (violet), and H<sub>2</sub> (blue) generation from CO<sub>2</sub> over time using of Ir-PS-1 along with C1 as photocatalyst (PC) and BIH as sacrificial donor. (A) TON values vs. time (B) TOF values vs. time. The photocatalytic reaction was carried out in a CO<sub>2</sub>-saturated DMA solution containing 2 μM of C1, BIH (0.2 M) as the electron donor, and Photosensitizer (PS) (5 mM), irradiated with a 440 nm LED with different time intervals.

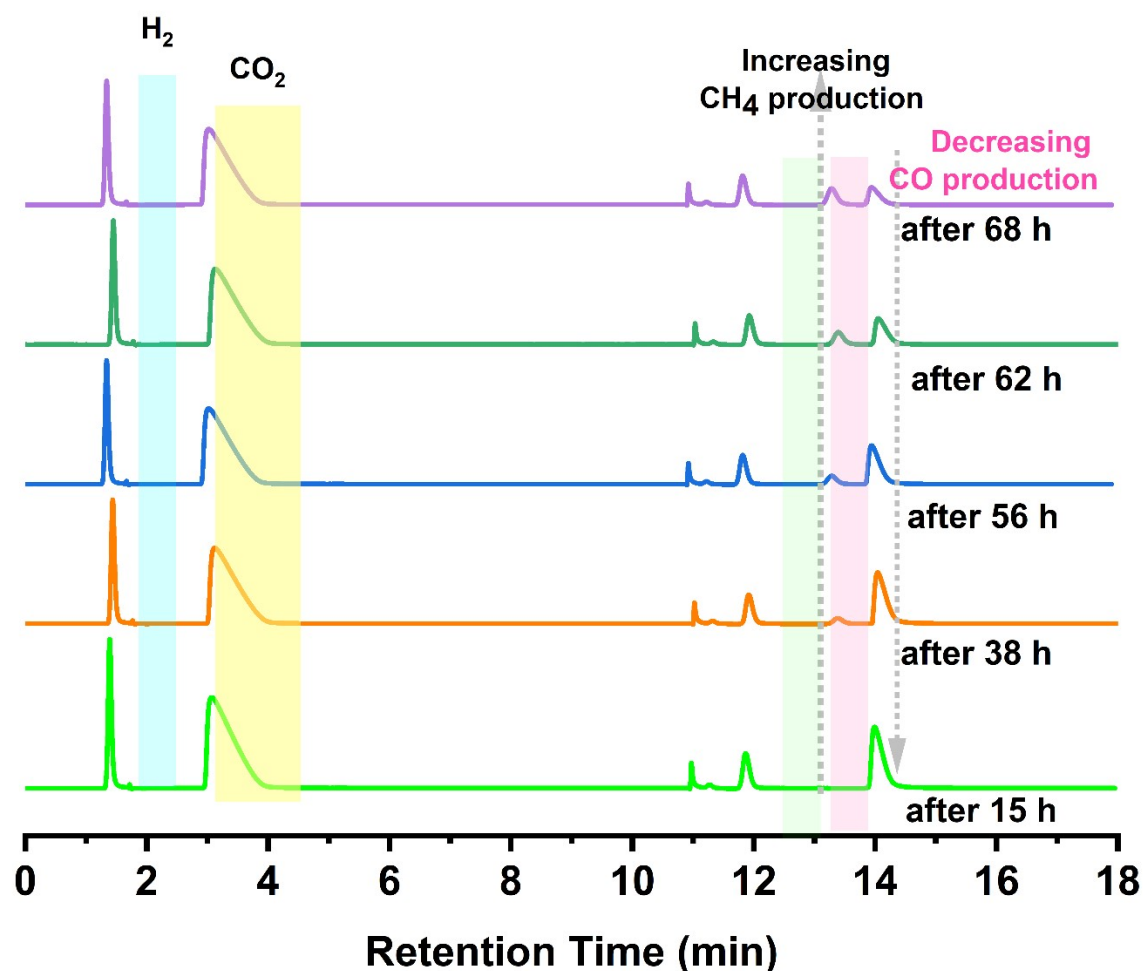

**Figure S36.** The GC data recorded for the progress of photocatalytic CO and CH<sub>4</sub> generation using Ir-PS-1 along with C1 as photocatalyst (PC) and BIH as sacrificial donor. Here with increase in the time of irradiation of light, increase in CH<sub>4</sub> production and decrease in CO production was observed. The photocatalytic reaction was carried out in a CO<sub>2</sub>-saturated DMA solution containing 2 μM of C1, BIH (0.2 M) as the electron donor, and Photosensitizer (PS) (5 mM), irradiated with a 440 nm LED with different time intervals.

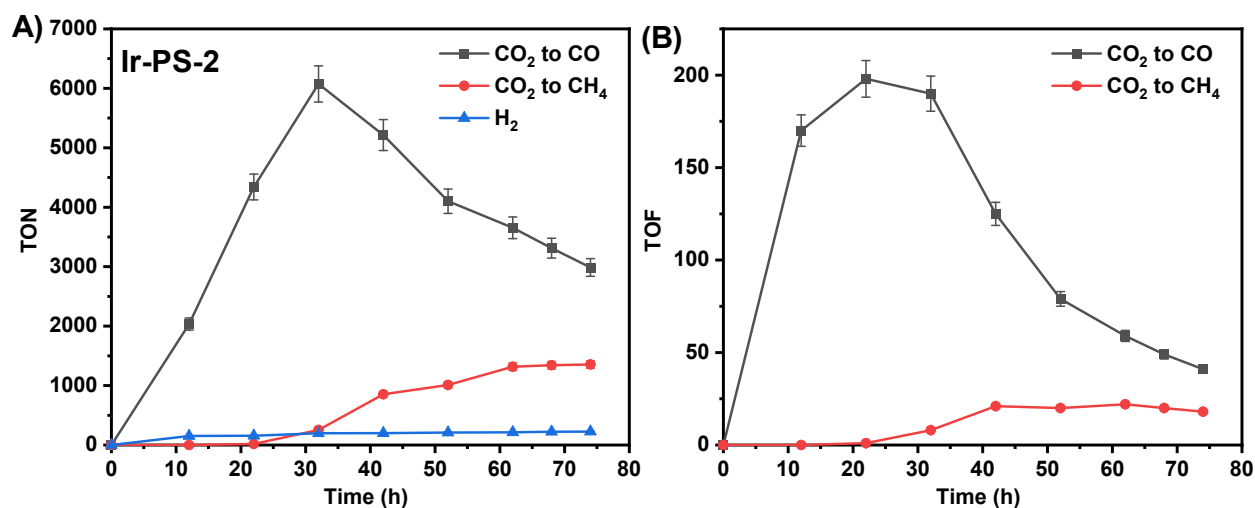

**Figure S37.** Progress of photocatalytic CO (orange), CH<sub>4</sub> (violet), and H<sub>2</sub>(blue) generation from CO<sub>2</sub> over time using of **Ir-PS-2** along with **C1** as photocatalyst (PC) and BIH as sacrificial donor. (A) TON values vs. time (B) TOF values vs. time. The photocatalytic reaction was carried out in a CO<sub>2</sub>-saturated DMA solution containing 2 μM of C1, BIH (0.2 M) as the electron donor, and Photosensitizer (PS) (5 mM), irradiated with a 440 nm LED with different time intervals.

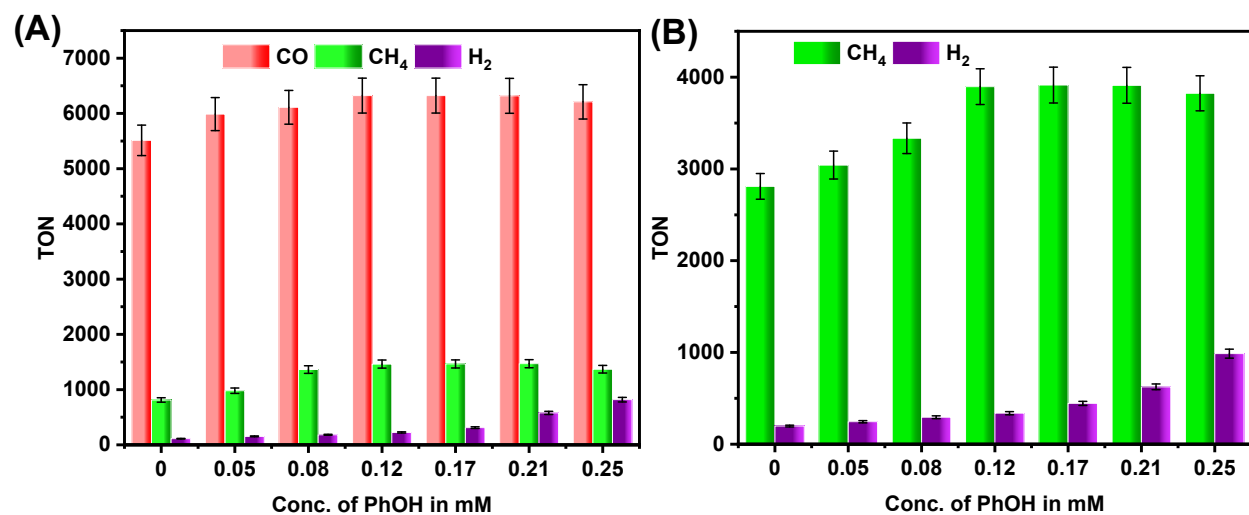

**Figure S38.** (A) Progress of photocatalytic CO<sub>2</sub> to [CO (radish), CH<sub>4</sub> (greenish), and H<sub>2</sub> (deep violet)] and CO to CH<sub>4</sub> generation in terms of TON over time using of **Ir-PS-1** along with **C1** as

photocatalyst (PC) and BIH as sacrificial donor. **(B)** Progress of photocatalytic CO to CH<sub>4</sub> (greenish), and H<sub>2</sub> (deep violet)] generation in terms of TON over time using of **Ir-PS-1** along with **C1** as photocatalyst (PC) and BIH as sacrificial donor. The photocatalytic reaction was carried out in a CO<sub>2</sub>-saturated DMA solution containing 2 μM of C1, BIH (0.2 M) as the electron donor, and Photosensitizer (PS) (5 mM), irradiated with a 440 nm LED with different time intervals.

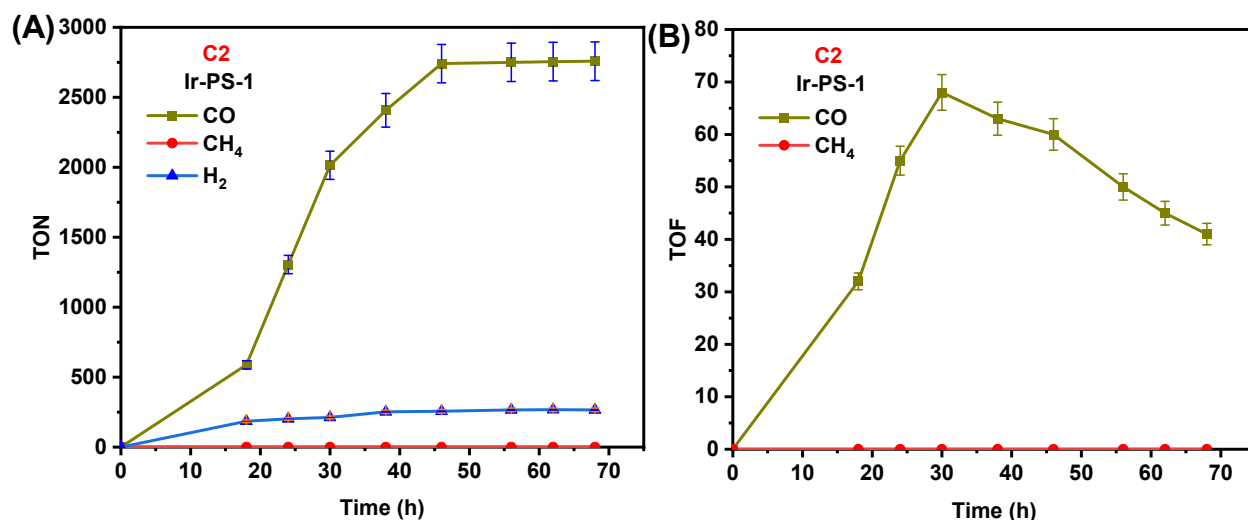

**Figure S39.** Progress of photocatalytic CO (dark green), CH<sub>4</sub> (red), and H<sub>2</sub>(blue) generation from CO<sub>2</sub> over time using of **Ir-PS-1** along with **C2** as photocatalyst (PC) and BIH as sacrificial donor. **(A)** TON values vs. time **(B)** TOF values vs. time. The photocatalytic reaction was carried out in a CO<sub>2</sub>-saturated DMA solution containing 2 μM of C1, BIH (0.2 M) as the electron donor, and Photosensitizer (PS) (5 mM), irradiated with a 440 nm LED with different time intervals.

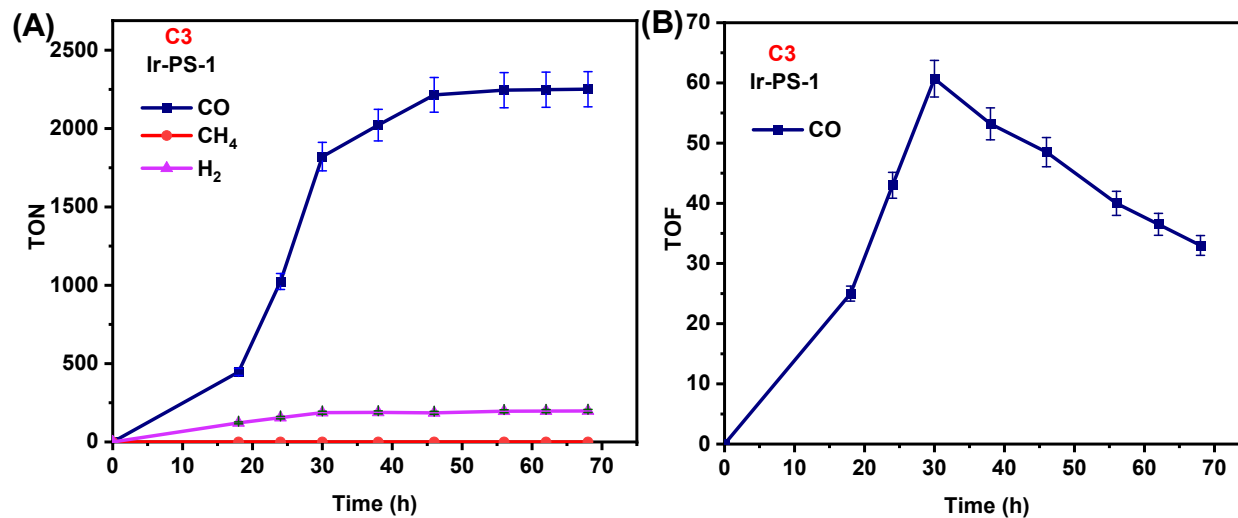

**Figure S40.** Progress of photocatalytic CO (dark blue), CH<sub>4</sub> (red), and H<sub>2</sub> (violet) generation over time using Ir-PS-1 along with C3 as photocatalyst (PC) and BIH as sacrificial donor. (A) TON values vs. time (B) TOF values vs. time. The photocatalytic reaction was carried out in a CO<sub>2</sub>-saturated DMA solution containing 2 μM of C1, BIH (0.2 M) as the electron donor, and Photosensitizer (PS) (5 mM), irradiated with a 440 nm LED with different time intervals.

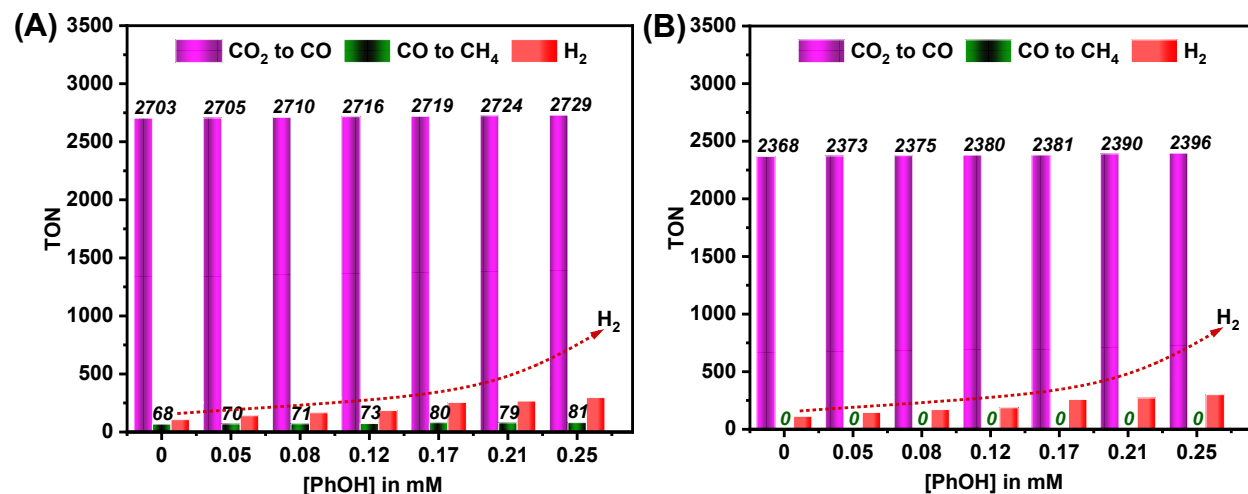

**Figure S41.** Progress of photocatalytic CO<sub>2</sub> to [CO (deep violet), CH<sub>4</sub> (yellow), and H<sub>2</sub> (red)] and CO to CH<sub>4</sub> generation in terms of TON over time using **Ir-PS-1** and BIH as a sacrificial donor along with catalyst (A) **C2** and (B) **C3**. The photocatalytic reaction was carried out in a CO<sub>2</sub>-saturated DMA solution containing 2 μM of C1, BIH (0.2 M) as the electron donor, and Photosensitizer (PS) (5 mM), irradiated with a 440 nm LED with different time intervals.

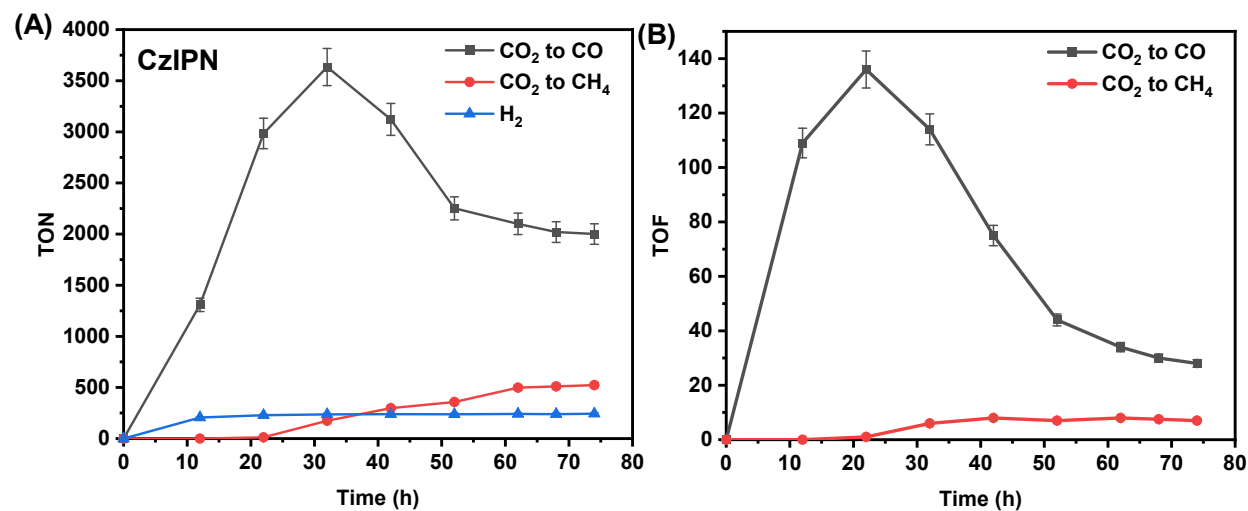

**Figure S42.** Progress of photocatalytic CO (orange), CH<sub>4</sub> (violet), and H<sub>2</sub> (blue) generation from CO<sub>2</sub> over time using of **CzipN** along with **C1** as photocatalyst (PC) and BIH as sacrificial donor. (A) TON values vs. time (B) TOF values vs. time. The photocatalytic reaction was carried out in a CO<sub>2</sub>-saturated DMA solution containing 2 μM of C1, BIH (0.2 M) as the electron donor, and Photosensitizer (PS) (5 mM), irradiated with a 440 nm LED with different time intervals.

CO<sub>2</sub>-saturated DMA solution containing 2 μM of C1, BIH (0.2 M) as the electron donor, and Photosensitizer (PS) (5 mM), irradiated with a 440 nm LED with different time intervals.

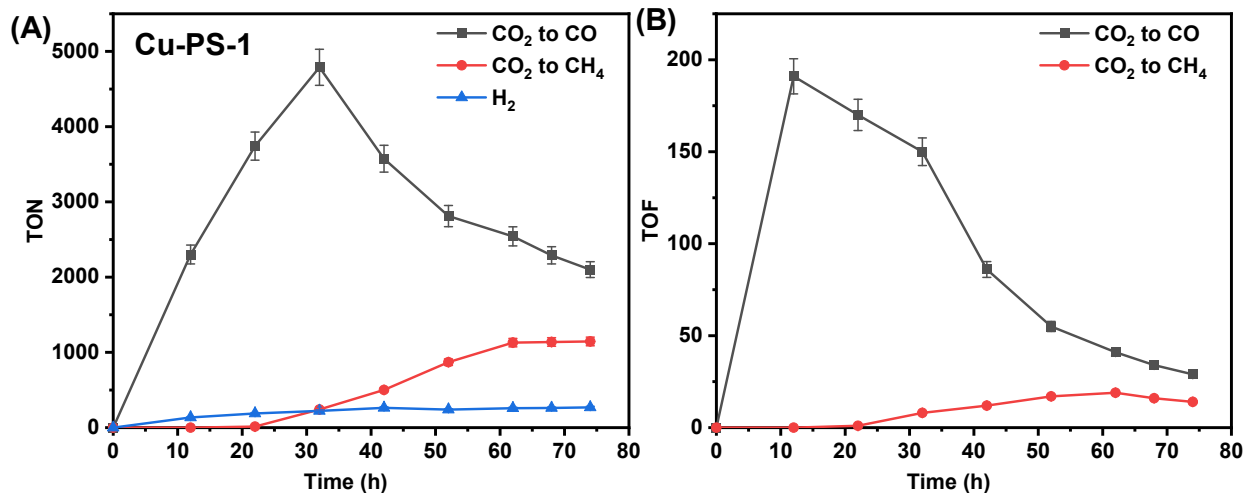

**Figure S43.** Progress of photocatalytic CO (orange), CH<sub>4</sub> (violet), and H<sub>2</sub>(blue) generation from CO<sub>2</sub> over time using of **Cu-PS-1** along with **C1** as photocatalyst (PC) and BIH as sacrificial donor. (A) TON values vs. time (B) TOF values vs. time. The photocatalytic reaction was carried out in a CO<sub>2</sub>-saturated DMA solution containing 2 μM of C1, BIH (0.2 M) as the electron donor, and Photosensitizer (PS) (5 mM), irradiated with a 440 nm LED with different time intervals.

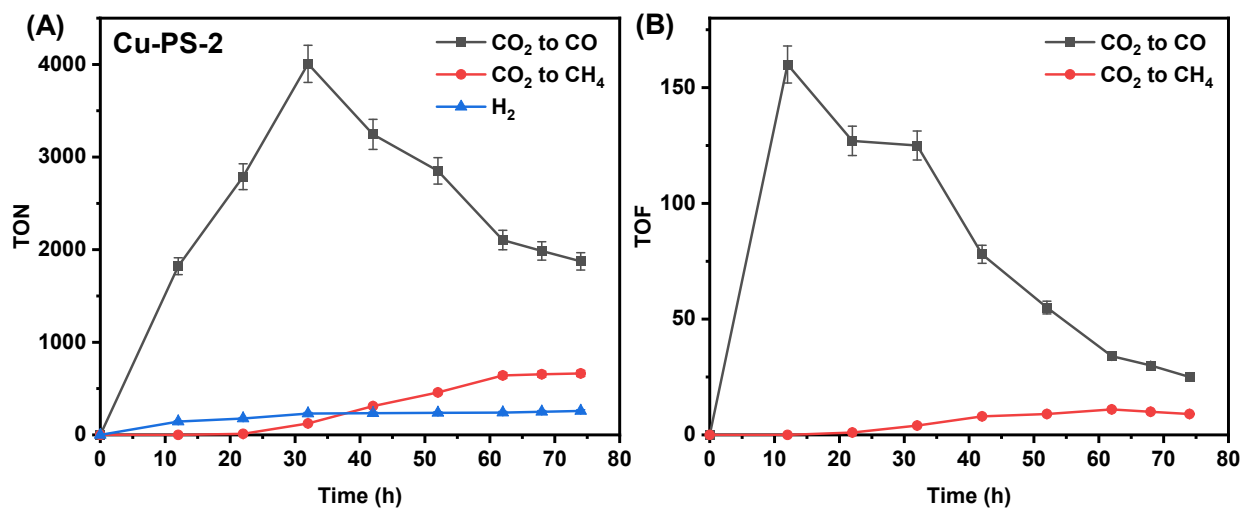

**Figure S44.** Progress of photocatalytic CO (orange), CH<sub>4</sub> (violet), and H<sub>2</sub>(blue) generation from CO<sub>2</sub> over time using of **Cu-PS-2** along with **C1** as photocatalyst (PC) and BIH as sacrificial donor. (A) TON values vs. time (B) TOF values vs. time. The photocatalytic reaction was carried out in a CO<sub>2</sub>-saturated DMA solution containing 2 μM of C1, BIH (0.2 M) as the electron donor, and Photosensitizer (PS) (5 mM), irradiated with a 440 nm LED with different time intervals.

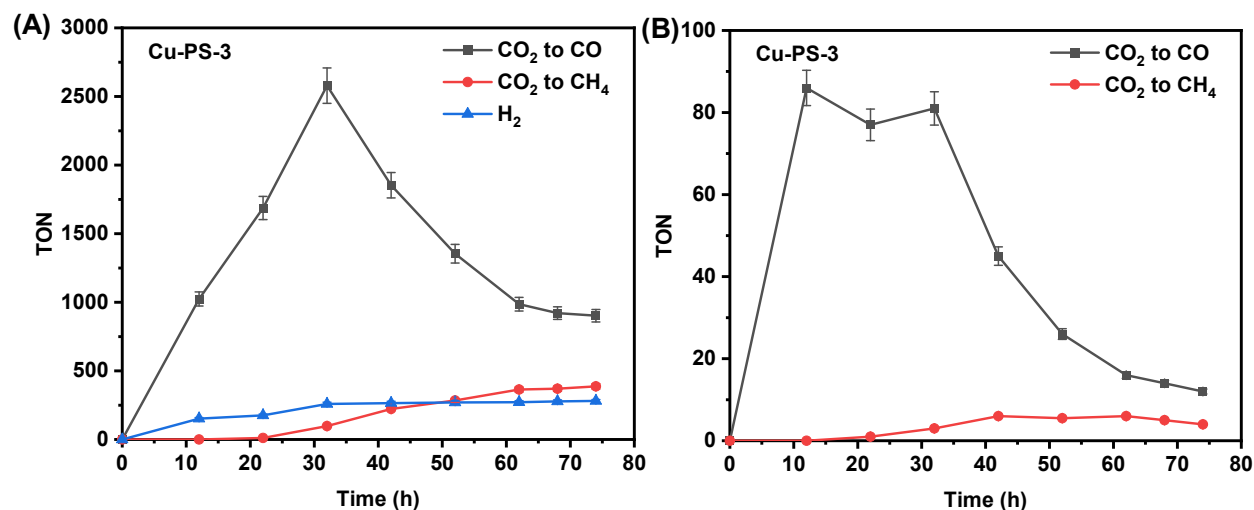

**Figure S45.** Progress of photocatalytic CO (orange), CH<sub>4</sub> (violet), and H<sub>2</sub> (blue) generation from CO<sub>2</sub> over time using of **Cu-PS-3** along with **C1** as photocatalyst (PC) and BIH as sacrificial donor. (A) TON values vs. time (B) TOF values vs. time. The photocatalytic reaction was carried out in a CO<sub>2</sub>-saturated DMA solution containing 2 μM of C1, BIH (0.2 M) as the electron donor, and Photosensitizer (PS) (5 mM), irradiated with a 440 nm LED with different time intervals.

### Time-dependent NMR studies

To gain insight into the mechanism, the progress of the model reaction was monitored by variable-time <sup>1</sup>H and <sup>31</sup>P{<sup>1</sup>H} NMR in a J. Young NMR tube in DMSO-*d*<sub>6</sub> under irradiation of visible 440 nm light. Initially, the <sup>1</sup>H and <sup>31</sup>P{<sup>1</sup>H} NMR spectra obtained resembled to the exact spectra of Cu<sup>I</sup> dimer. The spectra recorded after 32 h showed slight broadening in the <sup>31</sup>P{<sup>1</sup>H} NMR signal depicting the slight conversion of Cu<sup>I</sup> to Cu<sup>II</sup>. However, after 52 h broad and unresolved <sup>1</sup>H and

$^{31}\text{P}\{^1\text{H}\}$  spectra were obtained which shows the complete conversion of  $\text{Cu}^{\text{I}}$  to a paramagnetic  $\text{Cu}^{\text{II}}$  species.

**Time dependent NMR study of the Cu-PS-3 i.e.  $\text{Cu}^{\text{I}}$  dimer photosensitizer under the irradiation of 440 nm light.**

**NMR spectra after 1 h**

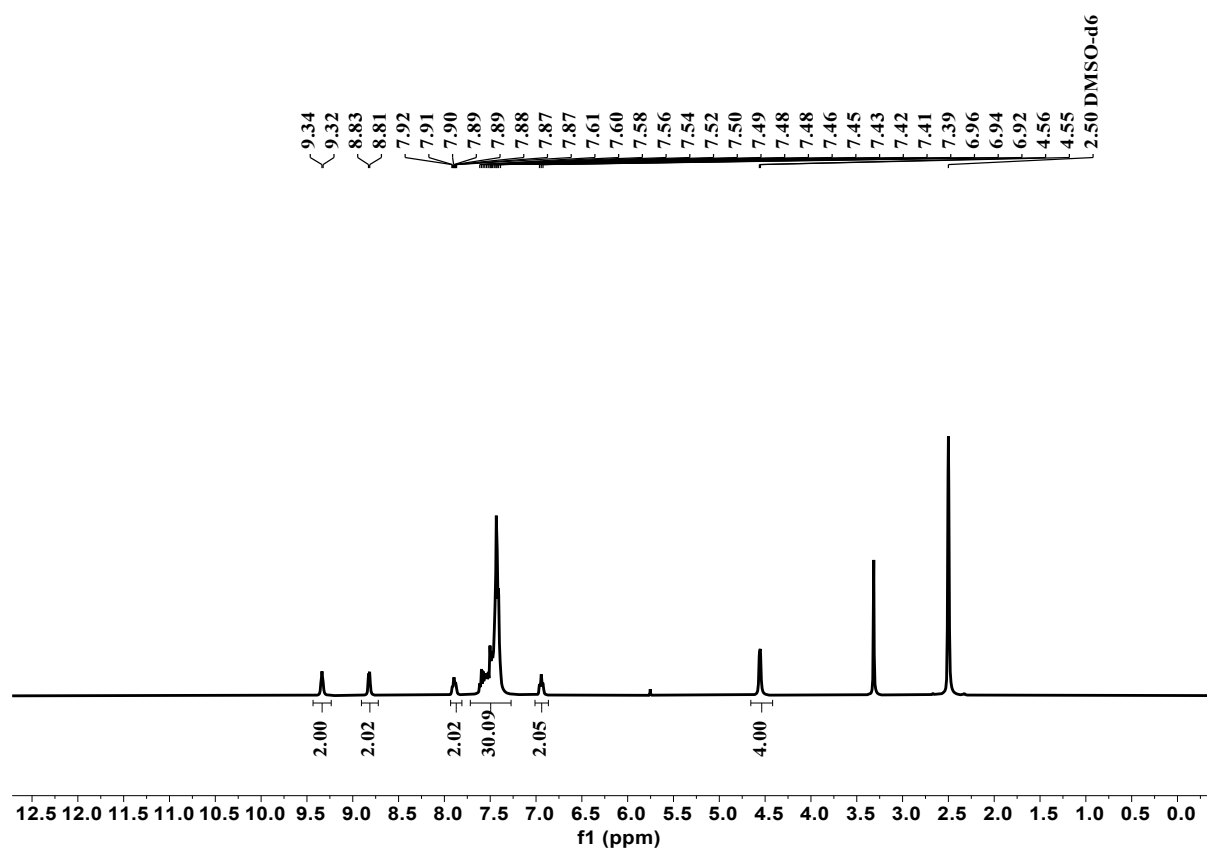

**Figure S46:**  $^1\text{H}$  NMR spectrum of Cu-PS-3 i.e.  $\text{Cu}^{\text{I}}$  dimer after 1 h irradiation of light.

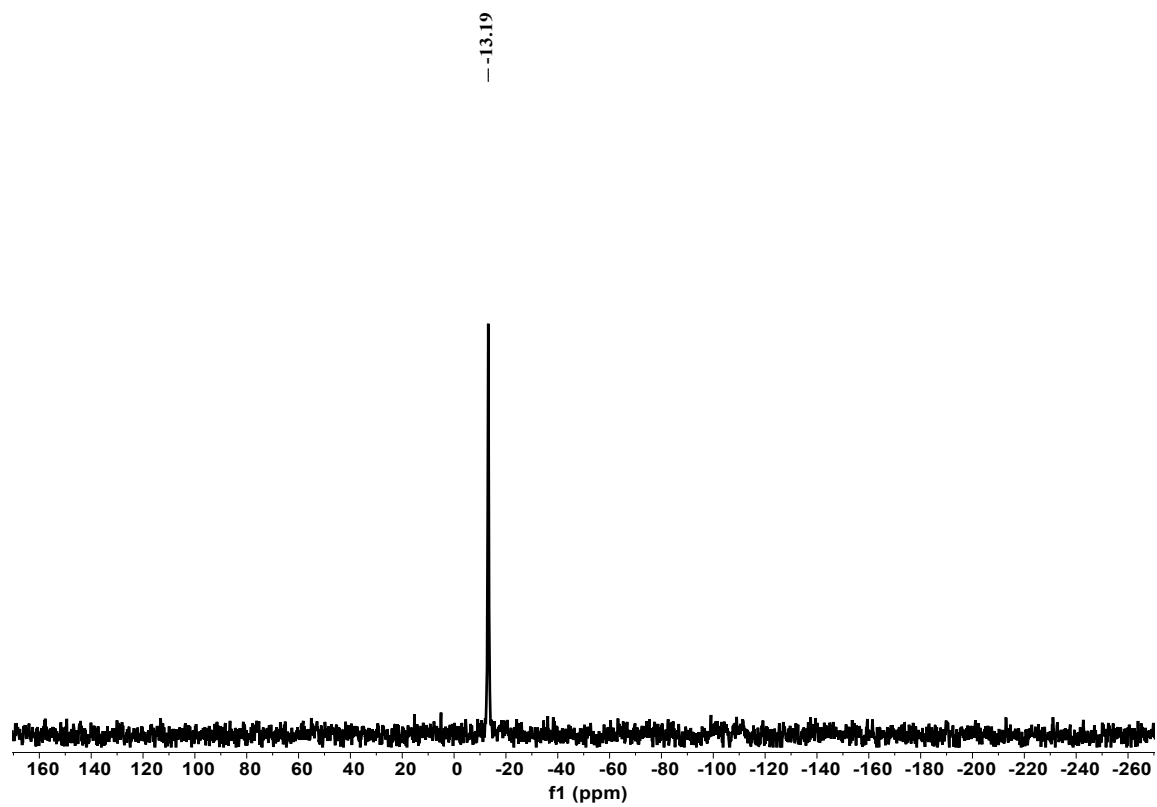

**Figure S47:**  $^{31}\text{P}\{^1\text{H}\}$  NMR spectrum of **Cu-PS-3** i.e. **Cu<sup>I</sup>** dimer after 1 h irradiation of light.

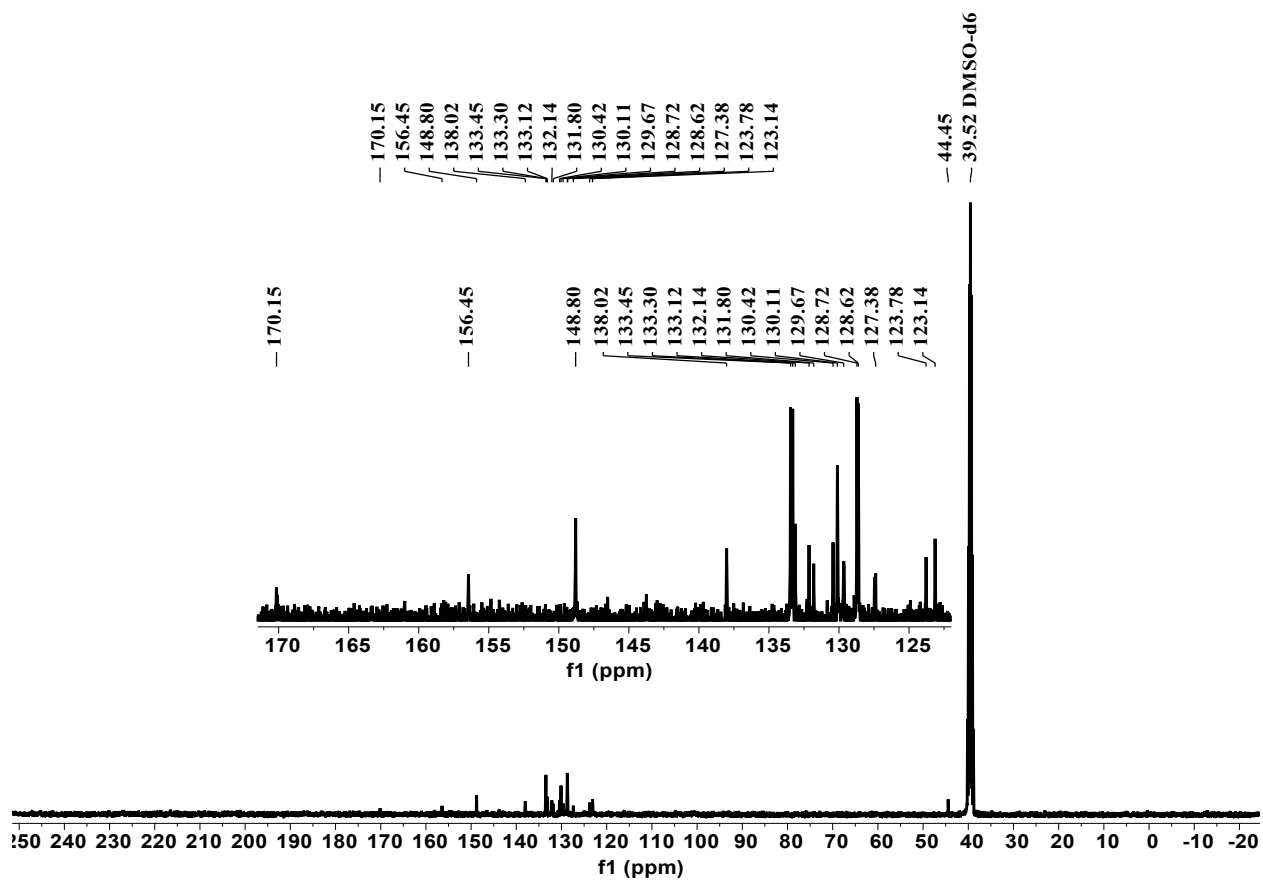

**Figure S48:**  $^{13}\text{C}\{^1\text{H}\}$  NMR spectrum of Cu-PS-3 i.e. Cu(I) dimer after 1 h irradiation of light.

**NMR spectra after 42 h**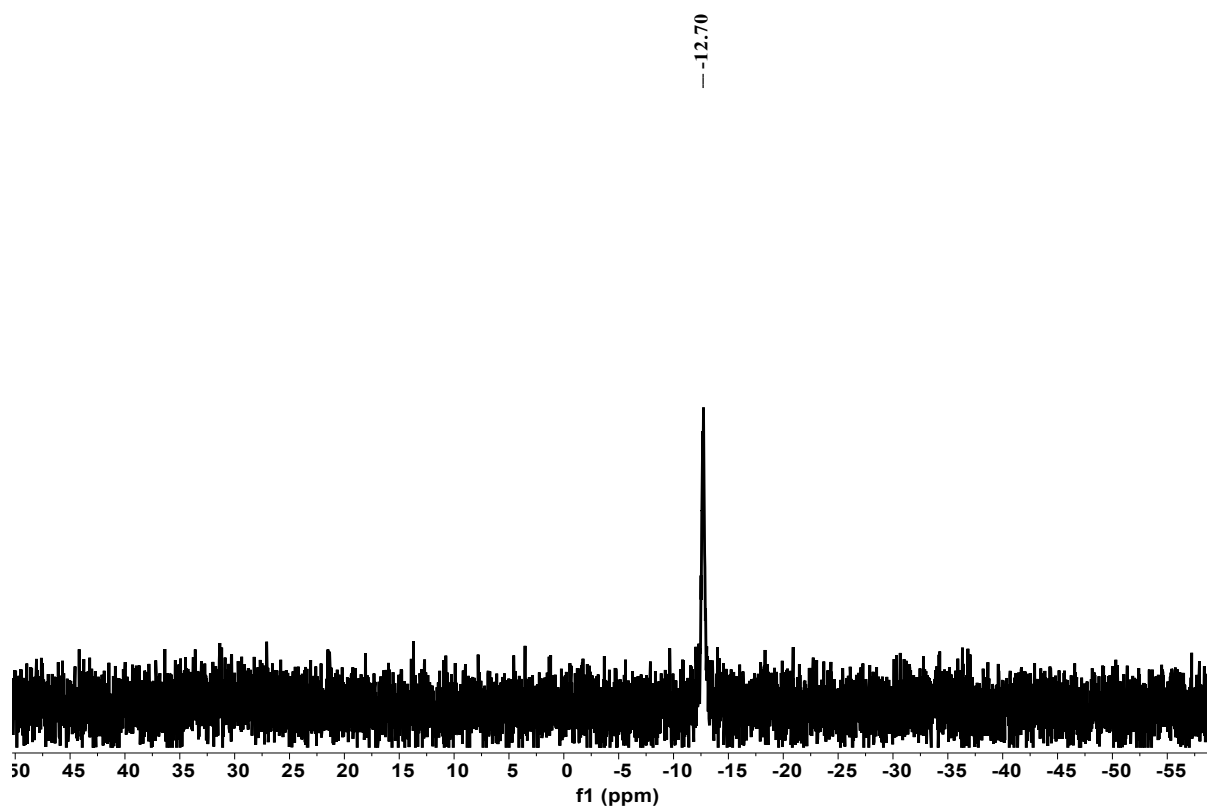

**Figure S49:**  $^{31}\text{P}\{^1\text{H}\}$  NMR spectrum of **Cu-PS-3** i.e. **Cu<sup>I</sup>** dimer after 42 h irradiation of light.

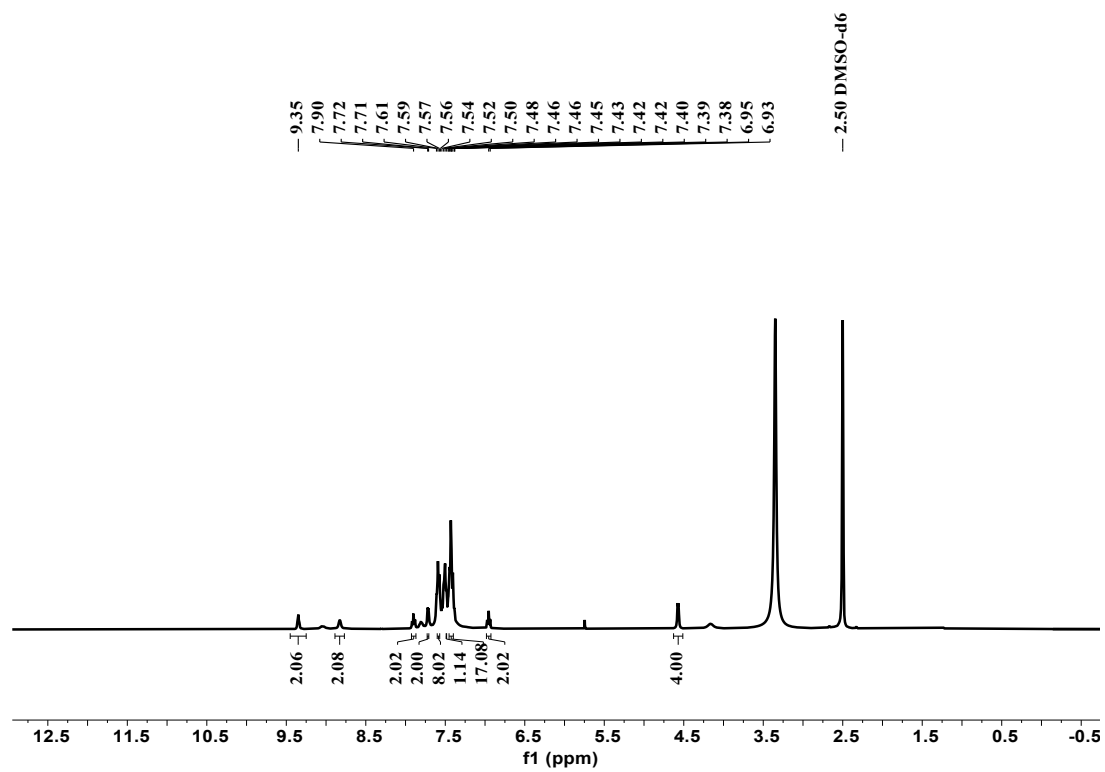

**Figure S50:**  $^1\text{H}$  NMR spectrum of Cu-PS-3 i.e. Cu(I) dimer after 42 h irradiation of light.

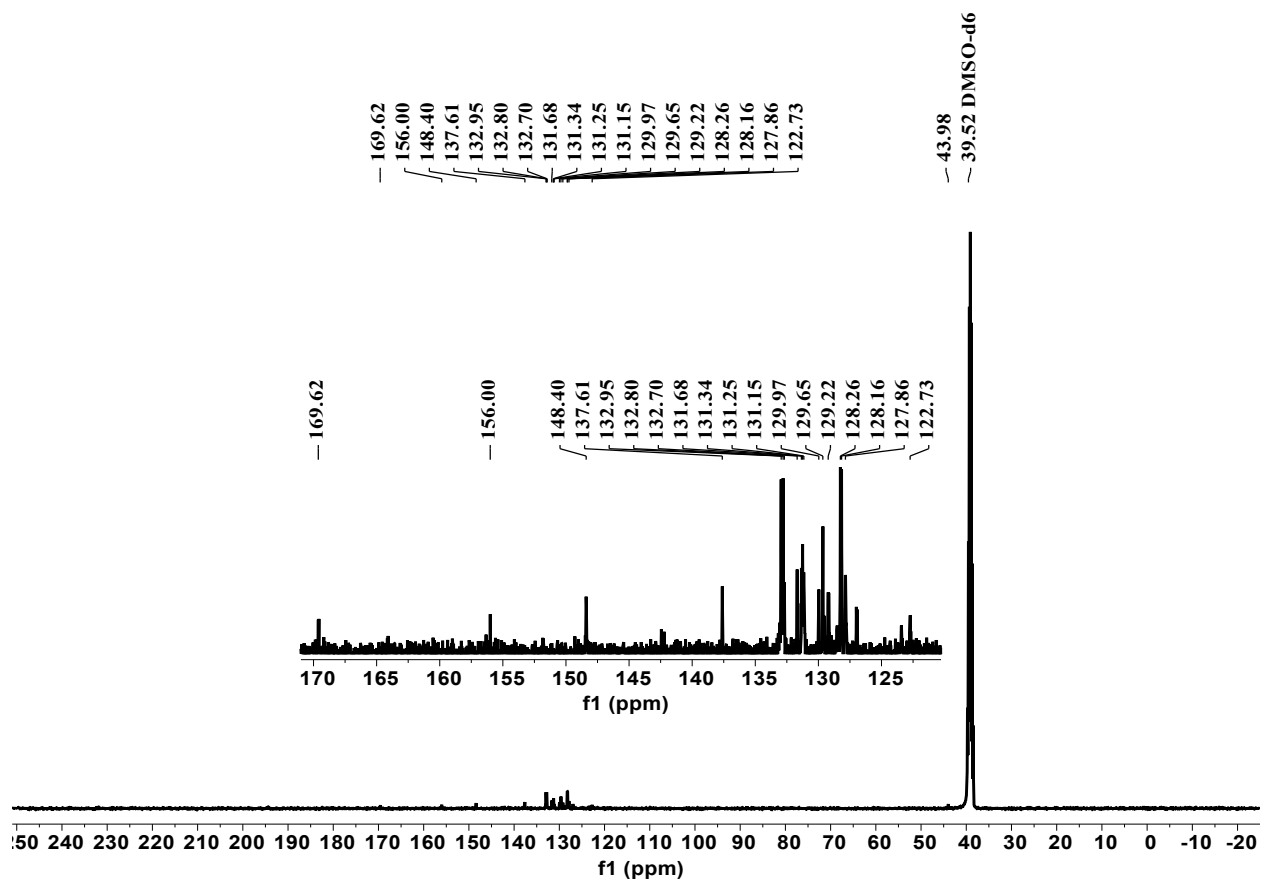

**Figure S51:**  $^{13}\text{C}\{^1\text{H}\}$  NMR spectrum of Cu-PS-3 i.e. Cu(I) dimer after 42 h irradiation of light.

**NMR spectra after 62 h**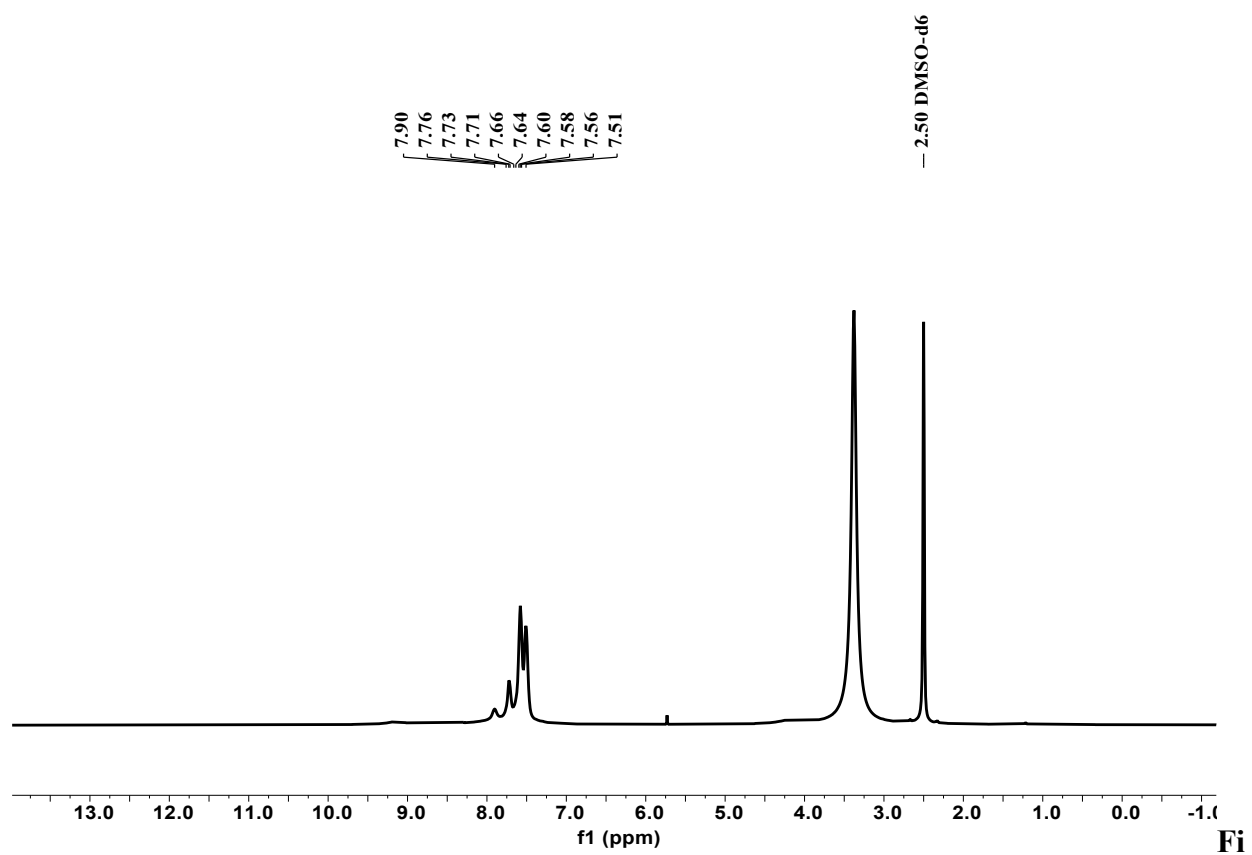

**Figure S52:**  $^1\text{H}$  NMR spectrum of **Cu-PS-3** i.e. **Cu(I)** dimer after 62 h irradiation of light.

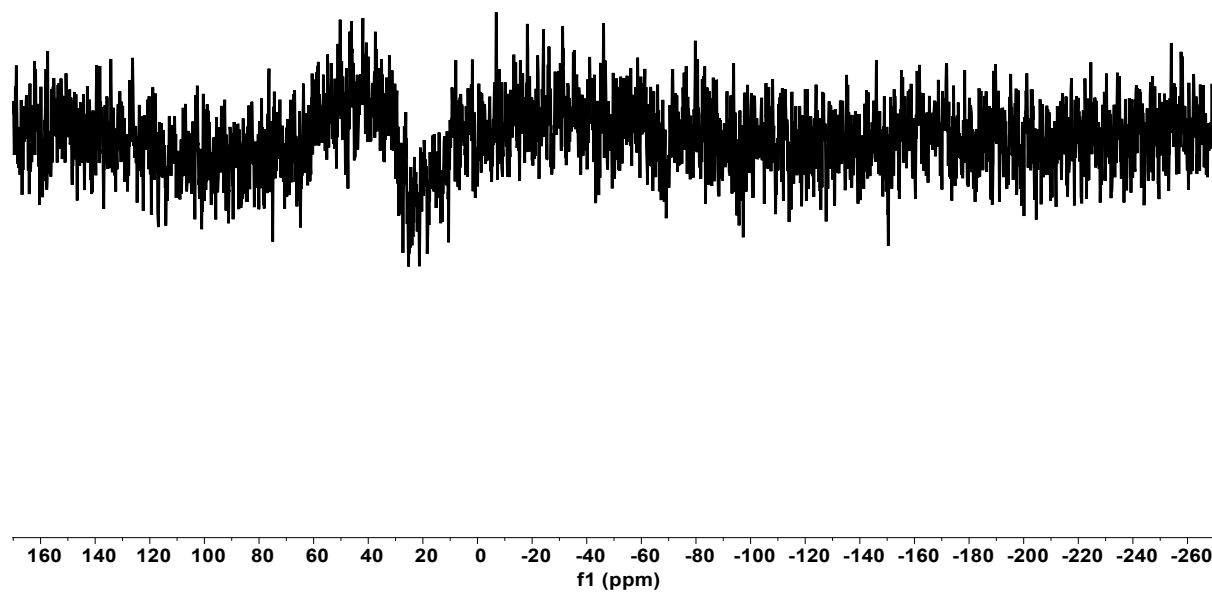

**Figure S53:**  $^{31}\text{P}\{^1\text{H}\}$  NMR spectrum of **Cu-PS-3** i.e. **Cu<sup>I</sup>** dimer after 62 h irradiation of light.

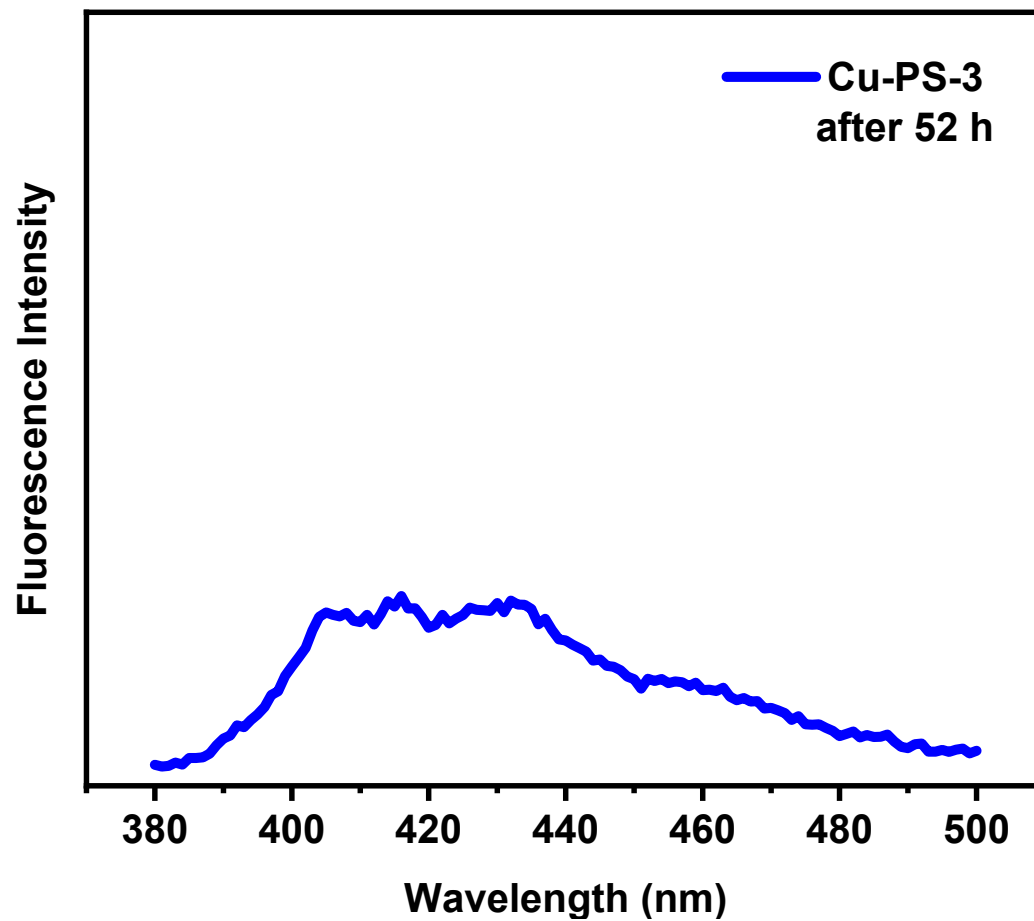

**Figure S54:** The changes in emission spectra of Cu-PS-3 after 62 h under the ideal photochemical condition.

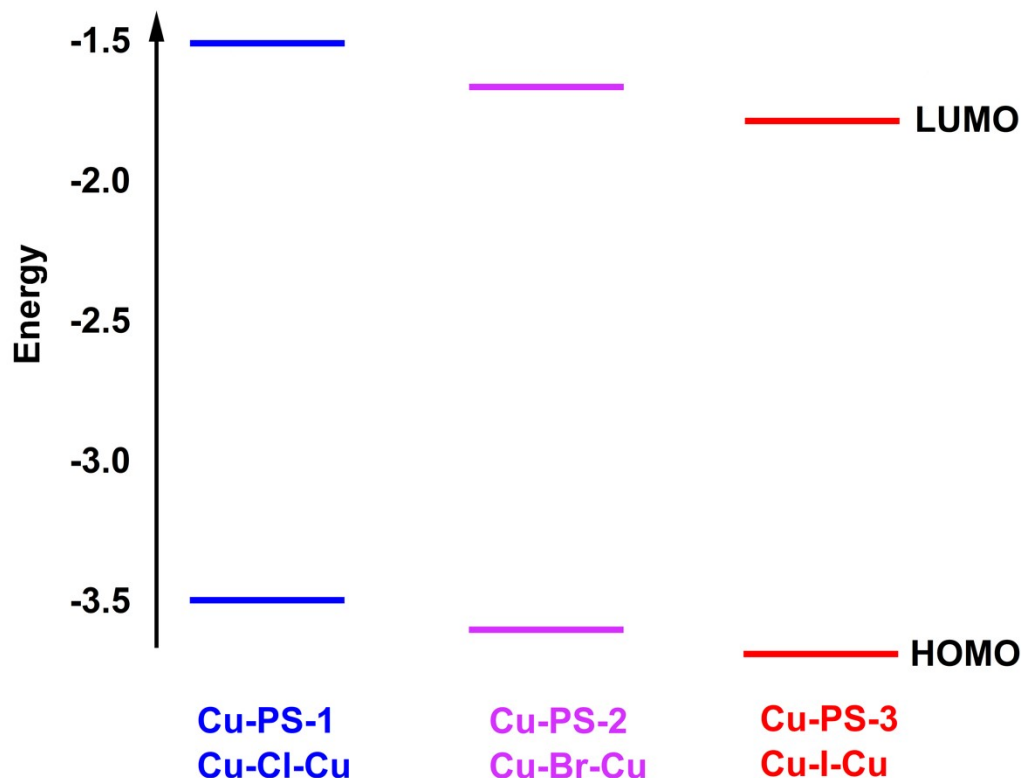

**Figure S55.** Energy calculation (HOMO-LUMO) for all these Cu-based catalysts (**Cu-PS-1**, **Cu-PS-2**, and **Cu-PS-3** from DFT calculation.

Full geometry optimizations were carried out by using a density functional theory method at the (R)B3LYP level for **Cu-PS-1**, **Cu-PS-2**, and **Cu-PS-3** and at the (U)B3LYP level for **Cu-PS-1**, **Cu-PS-2**, and **Cu-PS-3**. All calculations were performed with the Gaussian 09 program. Full geometry optimization was performed using the DFT method (U)B3LYP functional level. Except for Cu, all other elements were assigned the 6-31G\*\* basis set. The SDD basis set with effective core potential was employed for the Cu atom. Chemissian 1.7<sup>2</sup> was used to calculate the fractional contributions of various groups to each molecular orbital. Calculated structures were visualized with Chemcraft<sup>3</sup>. Vertical electronic excitation based on (U)B3LYP optimized geometries were computed using time-dependent density functional theory (TD-DFT) formalism<sup>4-6</sup> in DMA employing a conductor-like polarisable continuum model (CPCM)<sup>7-9</sup>. Electronic spectra were calculated using the SWizard program.<sup>10</sup>

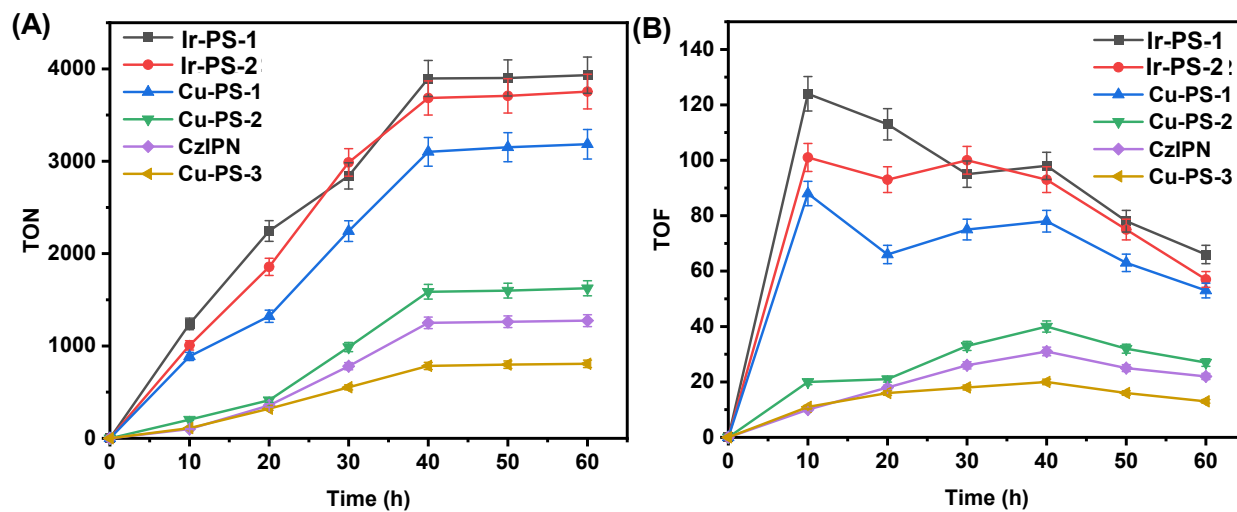

**Figure S56.** Progress of photocatalytic CH<sub>4</sub> generation from CO over time using different photosensitizers, **Ir-PS-1** (black trace), **Ir-PS-2** (red trace), **CzIPN** (violet trace), **Cu-PS-1** (cyan trace), **Cu-PS-2** (green trace), **Cu-PS-3** (orange yellow trace) along with **C1** as photocatalyst (PC) and BIH as sacrificial donor under saturated CO solution. **(A)** TON values vs. time **(B)** TOF values vs. time.

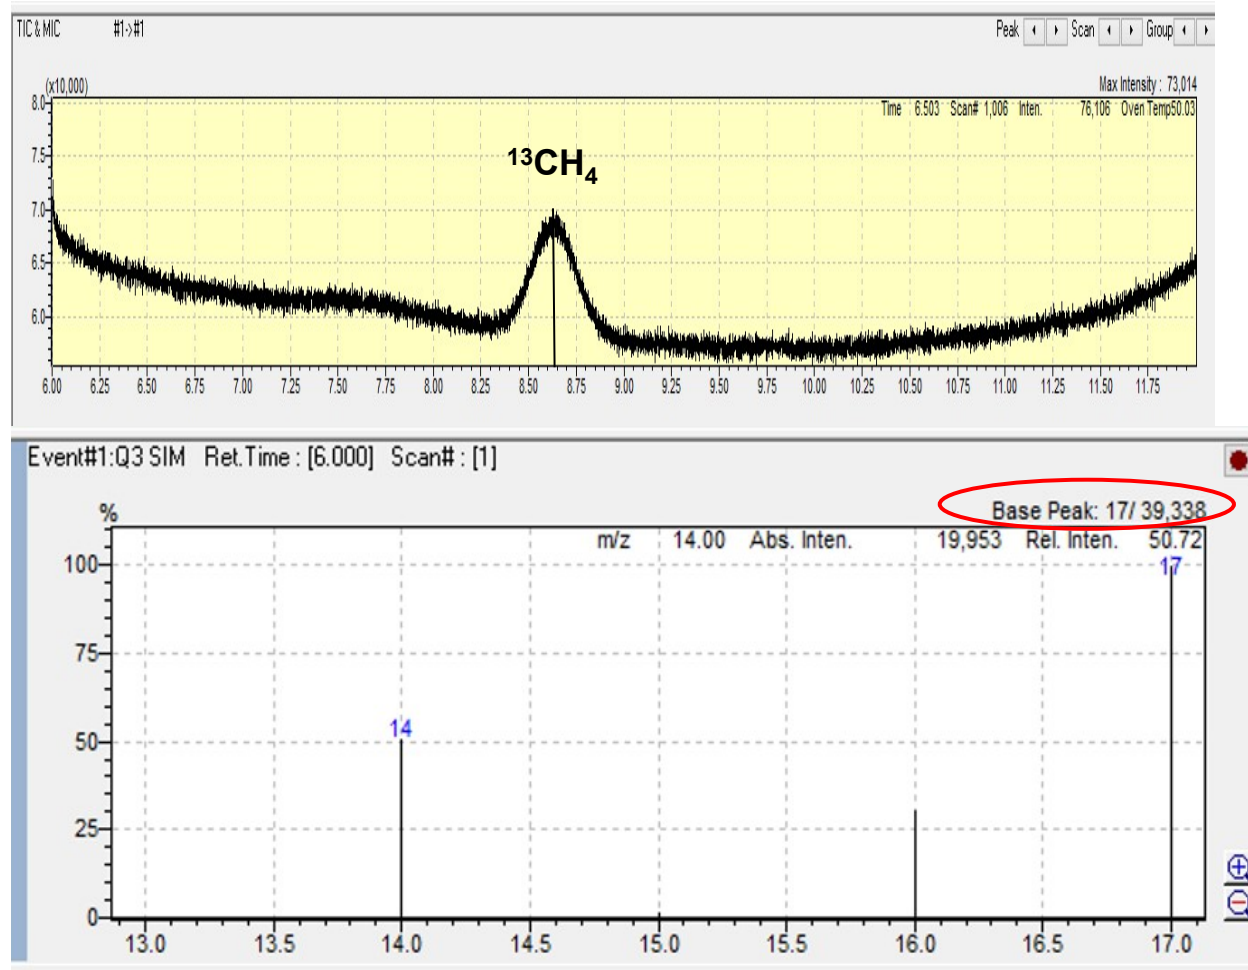

**Figure S57.** Analytical data of  $^{13}\text{C}$  isotopic tracing photocatalytic  $\text{CO}_2$  reduction experiment recorded by a Shimadzu GCMS-QP2020 (ShinCarbon ST 100/120, 2m 1mm 1/16" OD Silco). (A) TIC scan (B)  $^{13}\text{CH}_4$  mass spectrum. Reaction condition: The photocatalytic experiment was performed with a 2  $\mu\text{M}$  concentration of catalyst in DMA as a solvent, and BIH electron donor under irradiation of visible light, 440 LED.

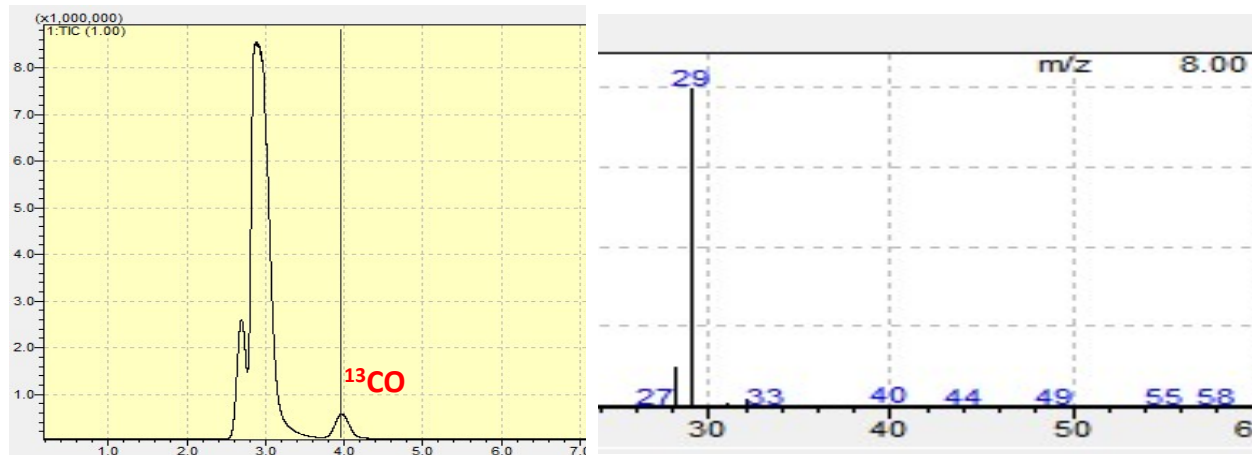

**Figure S58.** Analytical data of  $^{13}\text{C}$  isotopic tracing photocatalytic  $\text{CO}_2$  reduction experiment recorded by a Shimadzu GCMS-QP2020 (ShinCarbon ST 100/120, 2m 1mm 1/16" OD Silco). (A) TIC scan (B)  $^{13}\text{CO}$  mass spectrum. Reaction condition: The photocatalytic experiment was performed with a  $2\ \mu\text{M}$  concentration of catalyst in DMA as a solvent, and BIH electron donor under irradiation of visible light, 440 LED.

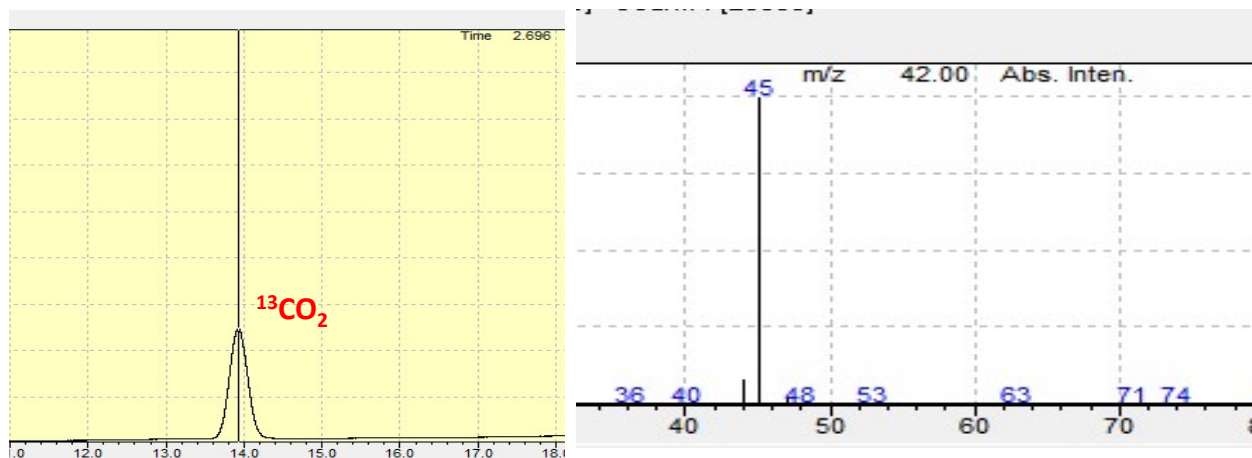

**Figure S59.** Analytical data of  $^{13}\text{C}$  isotopic tracing photocatalytic  $\text{CO}_2$  reduction experiment recorded by a Shimadzu GCMS-QP2020 (ShinCarbon ST 100/120, 2m 1mm 1/16" OD Silco). (A) TIC scan (B)  $^{13}\text{CO}_2$  mass spectrum. Reaction condition: The photocatalytic experiment was performed with a  $2\ \mu\text{M}$  concentration of catalyst in DMA as a solvent, and BIH electron donor under irradiation of visible light, 440 LED.

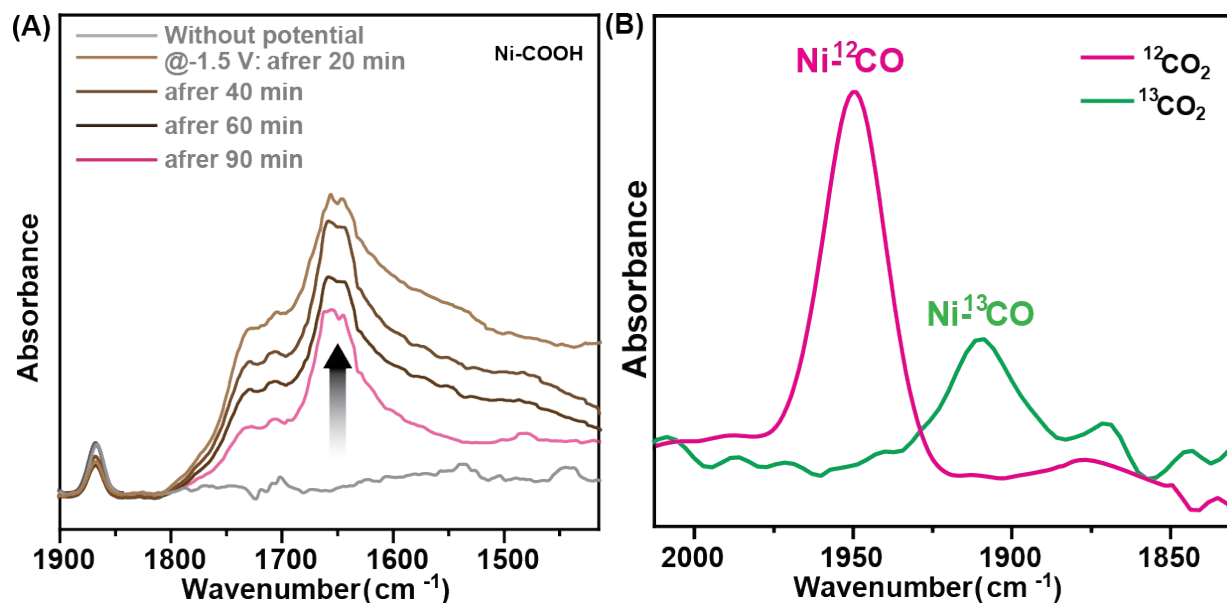

**Figure S60.** (A) The gradual change in the FTIR spectra of the complex C1 (30 mM) around the 1760-1500 cm<sup>-1</sup> region during a spectroelectrochemistry experiment in a 100% CO<sub>2</sub> atmosphere executed at -1.6 V vs. FeCp<sub>2</sub><sup>+0</sup>. The vertical arrows highlight the appearance of  $\bar{\nu}_{\text{C=O}}$  signal,  $\nu_{\text{Ni-CO}}$  signals,  $\nu_{\text{Ni-COOH}}$  and simultaneous disappearance of  $\bar{\nu}_{\text{CO}_2}$ . (B) FTIR spectra of Ni(II)-<sup>12</sup>CO (1962 cm<sup>-1</sup>) vs. Ni(II)-<sup>13</sup>CO (1911 cm<sup>-1</sup>) adduct in solvent (catalyst concentration 30 mM). The pink spectra represent the <sup>12</sup>CO<sub>2</sub> adducts of the catalyst C1, and the green ones represent its <sup>13</sup>CO<sub>2</sub> adducts.

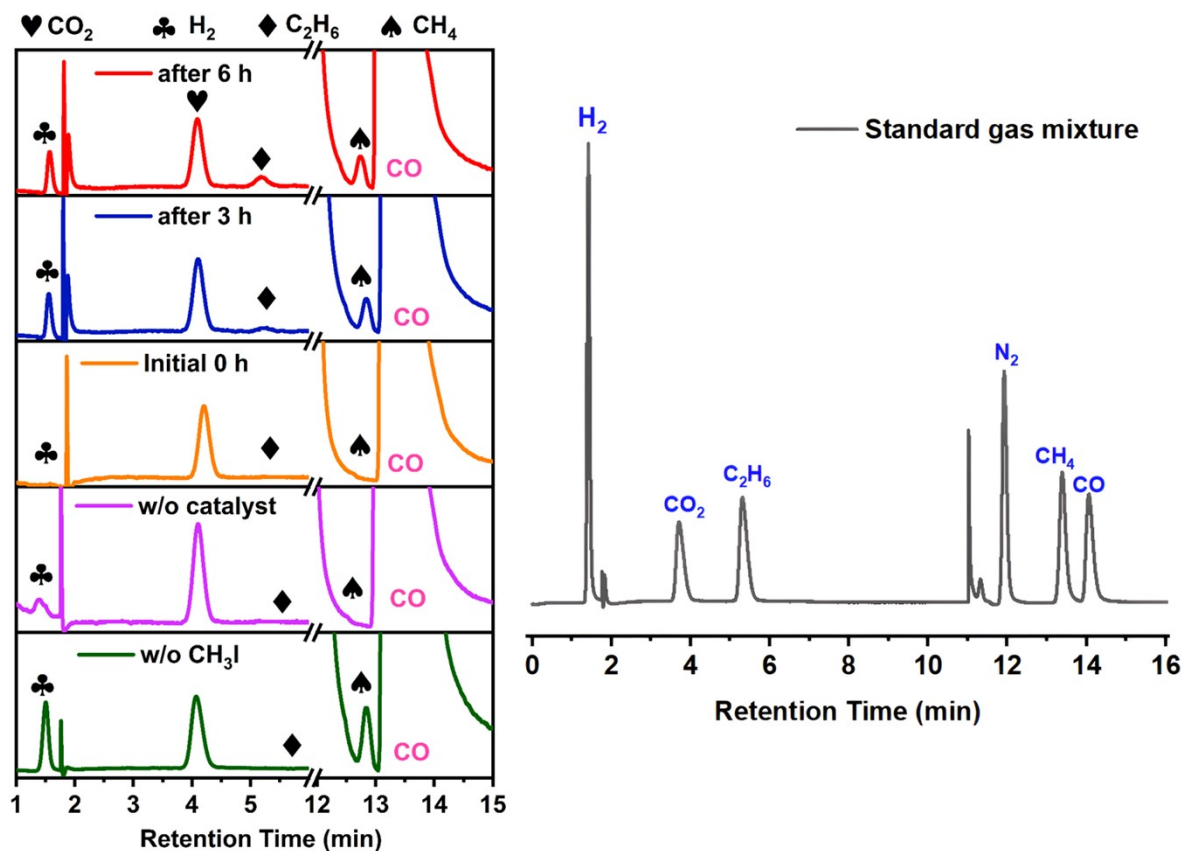

**Figure S61.** The progress in photochemical CORR reaction monitored via gas chromatography instrument in presence of **Ir-PS-1** as photosensitizer along with **C1** as photocatalyst (PC),  $\text{CH}_3\text{I}$  (5 equivalent with respect to the catalyst) and BIH as sacrificial donor under saturated  $\text{CO}$  solution. The **orange trace** before the irradiation of light source. The **blue trace** after 1 h irradiation of light source (formation of  $\text{CH}_4$  and  $\text{C}_2\text{H}_6$ ). The **red trace** after 3 h irradiation of light source (formation of  $\text{CH}_4$  and  $\text{C}_2\text{H}_6$ ). The **violet trace** under the identical condition without catalyst (no formation of  $\text{CH}_4$  and  $\text{C}_2\text{H}_6$ ). The **green trace** under the identical condition without  $\text{CH}_3\text{I}$  (only formation of  $\text{CH}_4$ ).

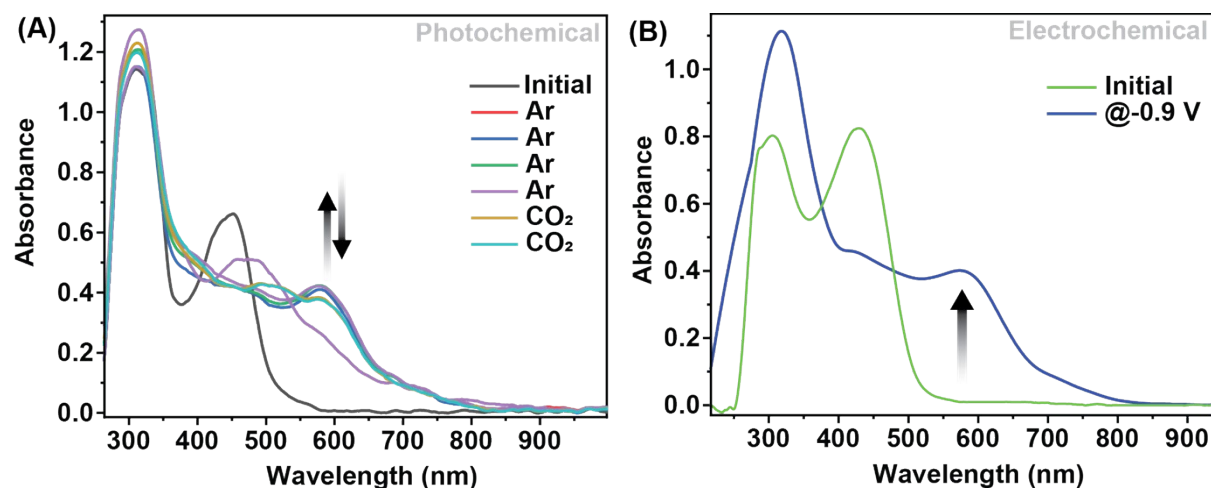

**Figure S62.** The comparative optical spectra displaying the changes observed for the catalytic solution *photochemical vs. electrochemical*: **A)** C1+PS+BIH (black trace)] sample following irradiation of light under Ar atmosphere: finally, generation of a new peak after 1 h (violet trace) followed by initial red trace and after 1 h CO<sub>2</sub> atmosphere, generation of another new peak (sky-blue trace). **B)** Electrochemically reduction of Ni<sup>II</sup>/Ni<sup>I</sup>: without potential (green trace) and after 1 h applied -0.9 V vs. FeCp<sub>2</sub><sup>+0</sup> potential (blue trace). These spectra were recorded in the range of 190 to 1000 nm at 298K.

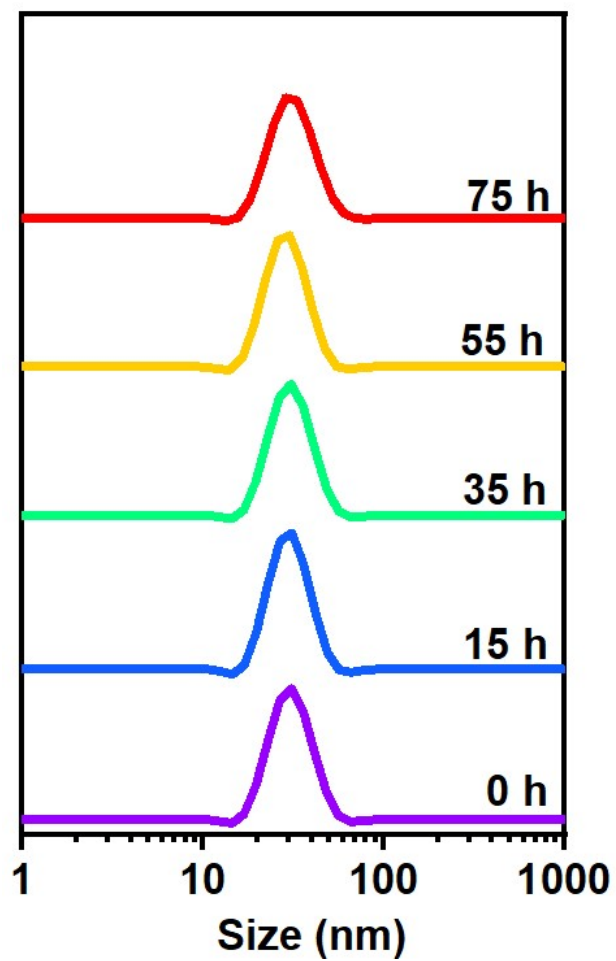

**Figure S63.** Particle size distribution of a CO<sub>2</sub>-saturated DMA solution containing 2 μM of C1, BIH (0.2 M) as the electron donor, and Photosensitizer (PS) (5 mM), irradiated with a 440 nm LED with different time intervals.

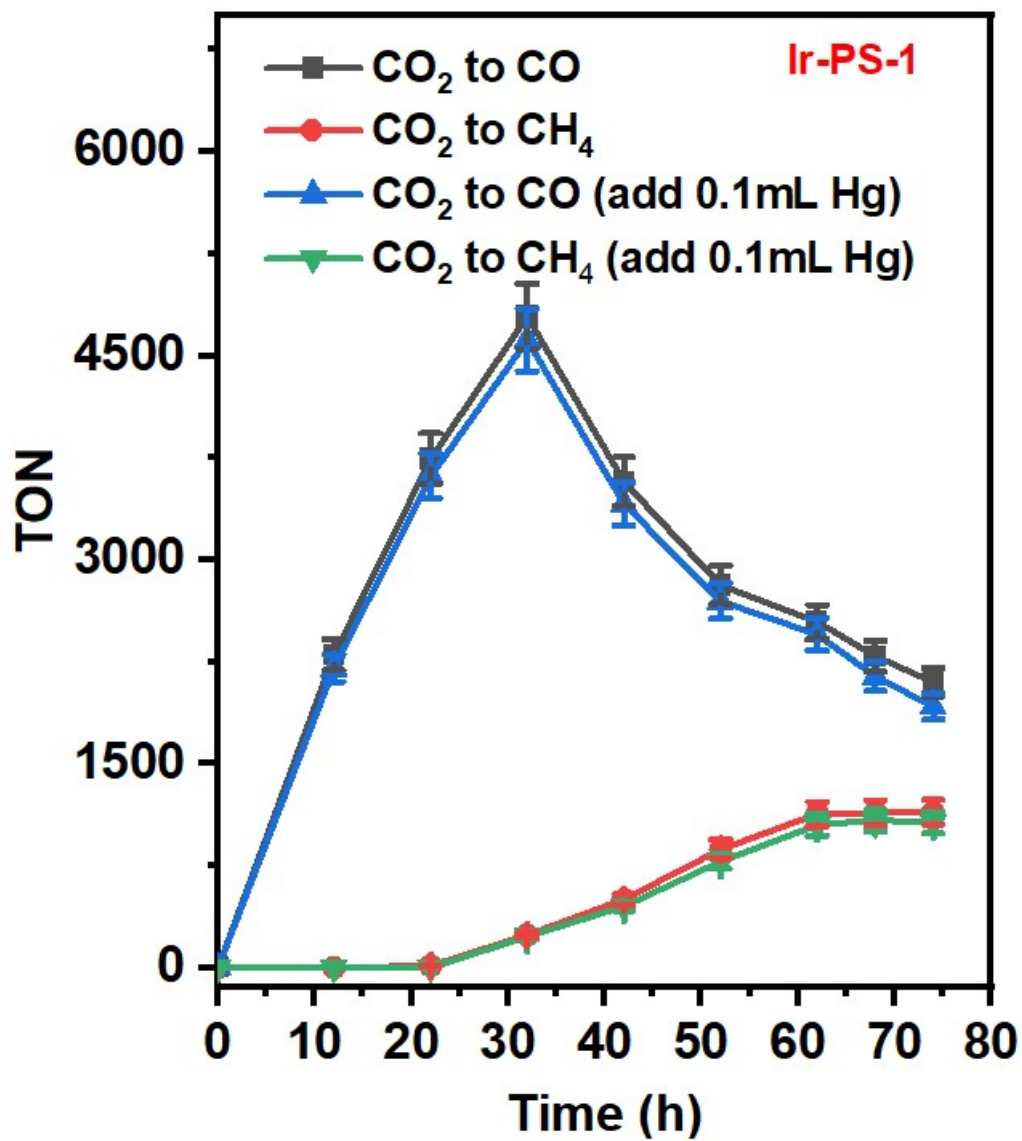

**Figure S64.** TON versus time during irradiation of 2  $\mu$ M of C1, BIH (0.2 M) as the electron donor, and Photosensitizer (PS) (5 mM), irradiated with a 440 nm LED with Hg (0.1 mL) or without Hg.

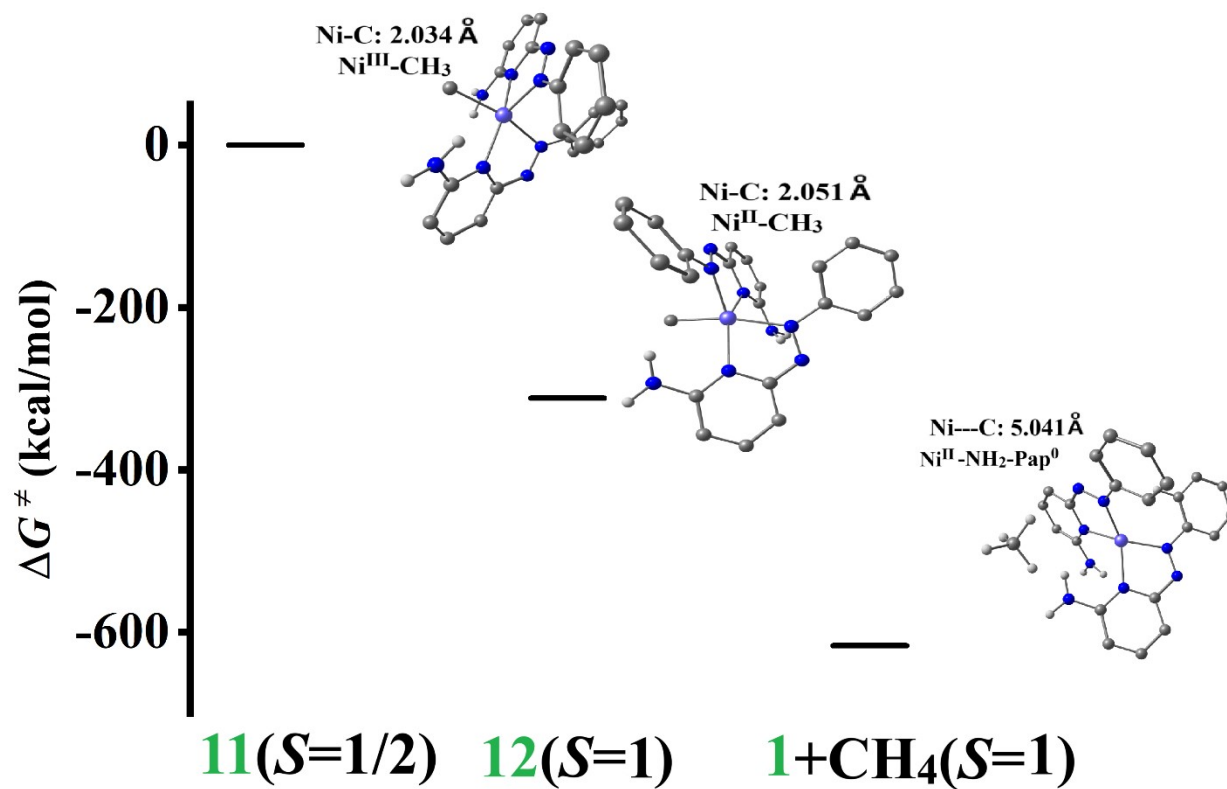

**Figure S65.** Gibbs free energy diagram (kcal/mol) for DFT-optimized structures of six coordinated CO adducts with the NiL<sub>2</sub> complex (**11**) Ni(III)-CH<sub>3</sub>, (**12**) Ni(II)-CH<sub>3</sub>, and (**1**) Ni(II) + CH<sub>4</sub>. Color codes: carbon → gray, hydrogen → white, nitrogen → blue, oxygen → red, and nickel → bluish gray.

**Table S1. Optimization conditions for photo-catalytic CO<sub>2</sub>/CO reduction reaction:**

| Entry | Catalyst          | Solvent | P.S.         | S.D.          | Proton Source    | Atmosphere      | TON <sub>CO</sub> | TON <sub>CH<sub>4</sub></sub> | TON <sub>H<sub>2</sub></sub> |
|-------|-------------------|---------|--------------|---------------|------------------|-----------------|-------------------|-------------------------------|------------------------------|
| 1.    | C1                | DMA     | Ir-PS-1      | BIH           | -                | CO <sub>2</sub> | 5512              | 812                           | 127                          |
| 2.    | C1                | DMA     | Ir-PS-1      | BIH           | -                | Ar              | -                 | -                             | 111                          |
| 3.    | C1                | DMA     | <b>No PS</b> | BIH           | -                | CO <sub>2</sub> | -                 | -                             | 12                           |
| 4.    | C1                | DMA     | Ir-PS-1      | <b>No BIH</b> | -                | CO <sub>2</sub> | -                 | -                             | 42                           |
| 5.    | <b>Without C1</b> | DMA     | Ir-PS-1      | BIH           | -                | CO <sub>2</sub> | <15               | -                             | 67                           |
| 6.    | C1                | DMA     | Ir-PS-1      | BIH           | TFE              | CO <sub>2</sub> | 5557              | 981                           | 207                          |
| 7.    | C1                | DMA     | Ir-PS-1      | BIH           | H <sub>2</sub> O | CO <sub>2</sub> | 5784              | 1290                          | 162                          |
| 8.    | C1                | DMA     | Ir-PS-1      | BIH           | PhOH             | CO <sub>2</sub> | 6323              | 1462                          | 215                          |
| 9.    | C1                | ACN     | Ir-PS-1      | BIH           | PhOH             | CO <sub>2</sub> | 5312              | 1002                          | 214                          |
| 10.   | C1                | DMA     | Ir-PS-2      | BIH           | PhOH             | CO <sub>2</sub> | 6074              | 1317                          | 213                          |
| 11.   | C1                | DMA     | CzIPN        | BIH           | PhOH             | CO <sub>2</sub> | 3634              | 498                           | 235                          |
| 12.   | C1                | DMA     | Cu-PS-1      | BIH           | PhOH             | CO <sub>2</sub> | 4789              | 1130                          | 244                          |
| 13.   | C1                | DMA     | Cu-PS-2      | BIH           | PhOH             | CO <sub>2</sub> | 4007              | 642                           | 240                          |
| 14.   | C1                | DMA     | Cu-PS-3      | BIH           | PhOH             | CO <sub>2</sub> | 2579              | 364                           | 265                          |
| 15.   | C1                | DMA     | Ir-PS-1      | BIH           | -                | CO              | -                 | 2810                          | 198                          |
| 16.   | C1                | DMA     | Ir-PS-1      | BIH           | PhOH             | CO              | -                 | 3897                          | 338                          |
| 17.   | C1                | ACN     | Ir-PS-1      | BIH           | PhOH             | CO              | -                 | 3278                          | 332                          |
| 18.   | C1                | DMA     | Ir-PS-2      | BIH           | PhOH             | CO              | -                 | 3685                          | 346                          |
| 19.   | C1                | DMA     | CzIPN        | BIH           | PhOH             | CO              | -                 | 1250                          | 344                          |

|     |    |     |         |     |      |                 |      |      |     |
|-----|----|-----|---------|-----|------|-----------------|------|------|-----|
| 20. | C1 | DMA | Cu-PS-1 | BIH | PhOH | CO              | -    | 3102 | 342 |
| 21. | C1 | DMA | Cu-PS-2 | BIH | PhOH | CO              | -    | 1587 | 348 |
| 22. | C1 | DMA | Cu-PS-3 | BIH | PhOH | CO              | -    | 784  | 334 |
| 23. | C2 | DMA | Ir-PS-1 | BIH | -    | CO <sub>2</sub> | 2685 | -    | 238 |
| 24. | C2 | DMA | Ir-PS-1 | BIH | PhOH | CO <sub>2</sub> | 2758 | -    | 257 |
| 25. | C2 | DMA | Ir-PS-1 | BIH | -    | CO              | -    | 73   | 245 |
| 26. | C2 | DMA | Ir-PS-1 | BIH | PhOH | CO              | -    | 88   | 265 |
| 27. | C3 | DMA | Ir-PS-1 | BIH | -    | CO <sub>2</sub> | 2165 | -    | 243 |
| 28. | C3 | DMA | Ir-PS-1 | BIH | PhOH | CO <sub>2</sub> | 2251 | -    | 262 |
| 29. | C3 | DMA | Ir-PS-1 | BIH | -    | CO              | -    | -    | 242 |
| 30. | C3 | DMA | Ir-PS-1 | BIH | PhOH | CO              | -    | -    | 267 |

**Table S2. Optimized Cartesian Coordinates Using (U/R)B3LYP/6-31G\*\*/SDD Level of Theory for the Optimization Energy Calculations**

| <b>1 (S=1) E(opt) = -1458.8271362 hartree</b> |                 |                 |                 |
|-----------------------------------------------|-----------------|-----------------|-----------------|
| <b>Cartesian Coordinates</b>                  |                 |                 |                 |
| Ni                                            | -2.351405000000 | 12.825774000000 | 3.488592000000  |
| N                                             | -1.355082000000 | 14.176892000000 | 2.398318000000  |
| N                                             | -1.234509000000 | 15.353450000000 | 2.897282000000  |
| N                                             | -2.330244000000 | 14.383304000000 | 4.763974000000  |
| N                                             | -3.351710000000 | 13.434297000000 | 6.618552000000  |
| H                                             | -3.398815000000 | 12.541981000000 | 6.156572000000  |
| H                                             | -3.723416000000 | 13.499708000000 | 7.551417000000  |
| N                                             | -3.739045000000 | 11.458860000000 | 3.946576000000  |
| N                                             | -3.324028000000 | 10.321878000000 | 4.373356000000  |
| C                                             | -1.952225000000 | 10.249286000000 | 4.518134000000  |
| N                                             | 0.893325000000  | 12.352050000000 | 4.078242000000  |
| H                                             | 0.477719000000  | 13.206128000000 | 3.746272000000  |
| H                                             | 1.894634000000  | 12.323665000000 | 4.172825000000  |
| C                                             | 0.011100000000  | 13.335761000000 | -1.446331000000 |
| H                                             | 0.357370000000  | 13.101121000000 | -2.447949000000 |
| C                                             | 0.088236000000  | 14.653839000000 | -0.977048000000 |
| H                                             | 0.491157000000  | 15.431026000000 | -1.617916000000 |
| C                                             | -0.351160000000 | 14.973421000000 | 0.294283000000  |
| H                                             | -0.307201000000 | 15.989214000000 | 0.670527000000  |
| C                                             | -0.878144000000 | 13.951706000000 | 1.105577000000  |
| C                                             | -0.957087000000 | 12.628289000000 | 0.634023000000  |
| H                                             | -1.359681000000 | 11.847482000000 | 1.281980000000  |
| C                                             | -0.511208000000 | 12.321902000000 | -0.640446000000 |

|   |                 |                 |                 |
|---|-----------------|-----------------|-----------------|
| H | -0.568843000000 | 11.304132000000 | -1.010406000000 |
| C | -1.747914000000 | 15.474422000000 | 4.173251000000  |
| C | -1.643504000000 | 16.707076000000 | 4.794550000000  |
| H | -1.176934000000 | 17.527501000000 | 4.263319000000  |
| C | -2.155331000000 | 16.836330000000 | 6.094046000000  |
| H | -2.095000000000 | 17.786432000000 | 6.614004000000  |
| C | -2.730286000000 | 15.750479000000 | 6.708411000000  |
| H | -3.127790000000 | 15.819246000000 | 7.715466000000  |
| C | -2.805600000000 | 14.506988000000 | 6.021340000000  |
| C | -7.793575000000 | 12.161232000000 | 3.299054000000  |
| H | -8.845424000000 | 12.358657000000 | 3.118015000000  |
| C | -6.855500000000 | 13.176332000000 | 3.099271000000  |
| H | -7.174768000000 | 14.158151000000 | 2.767420000000  |
| C | -5.514578000000 | 12.917000000000 | 3.327378000000  |
| H | -4.768128000000 | 13.700900000000 | 3.185316000000  |
| C | -5.109938000000 | 11.639011000000 | 3.754468000000  |
| C | -6.054701000000 | 10.616771000000 | 3.958222000000  |
| H | -5.721902000000 | 9.636635000000  | 4.280863000000  |
| C | -7.390646000000 | 10.889445000000 | 3.727549000000  |
| H | -8.131303000000 | 10.110673000000 | 3.874652000000  |
| C | -1.412776000000 | 9.063563000000  | 4.987012000000  |
| H | -2.073607000000 | 8.236101000000  | 5.214635000000  |
| C | -0.020717000000 | 8.988205000000  | 5.142563000000  |
| H | 0.440145000000  | 8.075502000000  | 5.504993000000  |
| C | 0.757476000000  | 10.078773000000 | 4.837821000000  |
| H | 1.835527000000  | 10.051216000000 | 4.955367000000  |
| C | 0.145847000000  | 11.272562000000 | 4.363752000000  |
| N | -1.191360000000 | 11.342847000000 | 4.196153000000  |

---

2 ( $S=1/2$ )  $E(\text{opt}) = -1459.1475562$  hartree

---

## Cartesian Coordinates

---

|    |                 |                 |                 |
|----|-----------------|-----------------|-----------------|
| Ni | -2.062380000000 | 12.841892000000 | 3.943781000000  |
| N  | -1.358353000000 | 14.143077000000 | 2.632105000000  |
| N  | -1.496437000000 | 15.404134000000 | 2.884116000000  |
| N  | -2.536852000000 | 14.579332000000 | 4.829553000000  |
| N  | -3.532214000000 | 13.720341000000 | 6.728971000000  |
| H  | -3.551678000000 | 12.825688000000 | 6.261018000000  |
| H  | -4.176395000000 | 13.842482000000 | 7.491603000000  |
| N  | -3.513120000000 | 11.503402000000 | 4.041822000000  |
| N  | -3.197254000000 | 10.253022000000 | 4.130192000000  |
| C  | -1.831654000000 | 10.051376000000 | 4.177467000000  |
| N  | 1.101144000000  | 12.060789000000 | 4.020229000000  |
| H  | 0.674070000000  | 12.924110000000 | 3.716534000000  |
| H  | 2.084004000000  | 11.954603000000 | 3.836028000000  |
| C  | 0.266004000000  | 13.136014000000 | -1.099953000000 |
| H  | 0.679998000000  | 12.861687000000 | -2.065453000000 |
| C  | 0.279691000000  | 14.471770000000 | -0.689917000000 |
| H  | 0.705684000000  | 15.231935000000 | -1.337355000000 |
| C  | -0.249478000000 | 14.835966000000 | 0.537381000000  |
| H  | -0.253122000000 | 15.867694000000 | 0.868877000000  |
| C  | -0.795206000000 | 13.847627000000 | 1.371749000000  |
| C  | -0.806599000000 | 12.506694000000 | 0.962234000000  |
| H  | -1.252688000000 | 11.759870000000 | 1.615065000000  |
| C  | -0.280659000000 | 12.156089000000 | -0.273215000000 |
| H  | -0.301787000000 | 11.119719000000 | -0.594549000000 |
| C  | -2.103384000000 | 15.644877000000 | 4.099165000000  |
| C  | -2.270880000000 | 16.960922000000 | 4.511915000000  |
| H  | -1.912110000000 | 17.763640000000 | 3.879727000000  |
| C  | -2.904908000000 | 17.186098000000 | 5.734717000000  |

|   |                 |                 |                |
|---|-----------------|-----------------|----------------|
| H | -3.053321000000 | 18.198997000000 | 6.094845000000 |
| C | -3.349643000000 | 16.117677000000 | 6.488210000000 |
| H | -3.845824000000 | 16.267827000000 | 7.441116000000 |
| C | -3.149625000000 | 14.803872000000 | 6.008403000000 |
| C | -7.592967000000 | 12.413730000000 | 3.729475000000 |
| H | -8.646145000000 | 12.663603000000 | 3.645173000000 |
| C | -6.624472000000 | 13.379874000000 | 3.461099000000 |
| H | -6.919226000000 | 14.379160000000 | 3.156770000000 |
| C | -5.278928000000 | 13.061951000000 | 3.577763000000 |
| H | -4.507030000000 | 13.796342000000 | 3.359230000000 |
| C | -4.896910000000 | 11.765792000000 | 3.951010000000 |
| C | -5.870841000000 | 10.790114000000 | 4.215060000000 |
| H | -5.555148000000 | 9.793133000000  | 4.501134000000 |
| C | -7.211228000000 | 11.123766000000 | 4.106895000000 |
| H | -7.968733000000 | 10.374637000000 | 4.315224000000 |
| C | -1.349025000000 | 8.756906000000  | 4.323507000000 |
| H | -2.050742000000 | 7.935721000000  | 4.400219000000 |
| C | 0.034976000000  | 8.577440000000  | 4.365474000000 |
| H | 0.453085000000  | 7.583041000000  | 4.482591000000 |
| C | 0.876517000000  | 9.666456000000  | 4.254055000000 |
| H | 1.954680000000  | 9.550859000000  | 4.284255000000 |
| C | 0.319664000000  | 10.955557000000 | 4.099818000000 |
| N | -1.015102000000 | 11.135912000000 | 4.060165000000 |

-----  
**3 (S=1) E(opt) = -1459.3336170 hartree**

---

Cartesian Coordinates

---

|    |                 |                 |                |
|----|-----------------|-----------------|----------------|
| Ni | -2.415387000000 | 12.871052000000 | 3.593831000000 |
| N  | -1.351186000000 | 14.123435000000 | 2.467728000000 |
| N  | -1.188288000000 | 15.370500000000 | 2.932987000000 |

|   |                 |                 |                 |
|---|-----------------|-----------------|-----------------|
| N | -2.279392000000 | 14.454583000000 | 4.809151000000  |
| N | -3.282866000000 | 13.457278000000 | 6.635989000000  |
| H | -3.526749000000 | 12.704846000000 | 6.005754000000  |
| H | -3.912909000000 | 13.588710000000 | 7.408966000000  |
| N | -3.726162000000 | 11.476272000000 | 3.860585000000  |
| N | -3.332840000000 | 10.298590000000 | 4.328489000000  |
| C | -1.979946000000 | 10.243712000000 | 4.481256000000  |
| N | 0.779447000000  | 12.481662000000 | 4.116878000000  |
| H | 0.290667000000  | 13.190458000000 | 3.583746000000  |
| H | 1.770117000000  | 12.418017000000 | 3.957891000000  |
| C | 0.045472000000  | 13.272581000000 | -1.394918000000 |
| H | 0.405182000000  | 13.036576000000 | -2.392282000000 |
| C | 0.157043000000  | 14.570986000000 | -0.893347000000 |
| H | 0.606804000000  | 15.348651000000 | -1.506123000000 |
| C | -0.299045000000 | 14.888189000000 | 0.376837000000  |
| H | -0.218268000000 | 15.892483000000 | 0.776718000000  |
| C | -0.887718000000 | 13.891346000000 | 1.179006000000  |
| C | -0.997514000000 | 12.583007000000 | 0.669639000000  |
| H | -1.452034000000 | 11.815264000000 | 1.296491000000  |
| C | -0.535484000000 | 12.281722000000 | -0.602510000000 |
| H | -0.630542000000 | 11.267135000000 | -0.980258000000 |
| C | -1.667332000000 | 15.518441000000 | 4.189014000000  |
| C | -1.549700000000 | 16.756729000000 | 4.845516000000  |
| H | -1.072696000000 | 17.577421000000 | 4.323530000000  |
| C | -2.049850000000 | 16.877487000000 | 6.129602000000  |
| H | -1.968583000000 | 17.825265000000 | 6.654944000000  |
| C | -2.657409000000 | 15.794325000000 | 6.762701000000  |
| H | -3.039536000000 | 15.865798000000 | 7.775421000000  |
| C | -2.752153000000 | 14.582062000000 | 6.062535000000  |
| C | -7.844545000000 | 12.082184000000 | 3.320470000000  |

|   |                 |                 |                |
|---|-----------------|-----------------|----------------|
| H | -8.906623000000 | 12.254815000000 | 3.172895000000 |
| C | -6.932949000000 | 13.121330000000 | 3.135561000000 |
| H | -7.279790000000 | 14.108831000000 | 2.844862000000 |
| C | -5.576756000000 | 12.897703000000 | 3.322825000000 |
| H | -4.857921000000 | 13.707375000000 | 3.185785000000 |
| C | -5.109797000000 | 11.627431000000 | 3.696357000000 |
| C | -6.029042000000 | 10.583938000000 | 3.885023000000 |
| H | -5.654823000000 | 9.608278000000  | 4.173450000000 |
| C | -7.383463000000 | 10.819628000000 | 3.694904000000 |
| H | -8.091450000000 | 10.007491000000 | 3.838388000000 |
| C | -1.383305000000 | 9.058251000000  | 4.933946000000 |
| H | -2.015178000000 | 8.206015000000  | 5.152652000000 |
| C | -0.005259000000 | 9.029062000000  | 5.076868000000 |
| H | 0.487377000000  | 8.122922000000  | 5.418303000000 |
| C | 0.756068000000  | 10.155409000000 | 4.786508000000 |
| H | 1.835142000000  | 10.155948000000 | 4.900668000000 |
| C | 0.103275000000  | 11.321613000000 | 4.350636000000 |
| N | -1.234655000000 | 11.354408000000 | 4.189426000000 |

-----

4 (S=1) E(opt) = -1648.3402040 hartree

---

Cartesian Coordinates

---

|    |                 |                 |                |
|----|-----------------|-----------------|----------------|
| Ni | -2.002341000000 | 12.867807000000 | 4.112308000000 |
| N  | -1.494922000000 | 14.159836000000 | 2.586762000000 |
| N  | -1.816922000000 | 15.378233000000 | 2.728872000000 |
| N  | -2.786924000000 | 14.670797000000 | 4.775361000000 |
| N  | -3.764339000000 | 13.968384000000 | 6.765523000000 |
| H  | -3.172853000000 | 13.148463000000 | 6.756102000000 |
| H  | -4.209085000000 | 14.200560000000 | 7.639601000000 |
| N  | -3.617396000000 | 11.574662000000 | 3.962770000000 |
| N  | -3.286030000000 | 10.299441000000 | 4.090109000000 |

|   |                 |                 |                 |
|---|-----------------|-----------------|-----------------|
| C | -1.970109000000 | 10.044385000000 | 4.009811000000  |
| N | 1.121572000000  | 11.799411000000 | 3.185489000000  |
| H | 0.830645000000  | 12.172416000000 | 2.267592000000  |
| H | 2.092930000000  | 11.487139000000 | 3.129067000000  |
| C | 0.625330000000  | 13.260326000000 | -0.944691000000 |
| H | 1.166910000000  | 13.020774000000 | -1.854291000000 |
| C | 0.770352000000  | 14.521767000000 | -0.355707000000 |
| H | 1.429836000000  | 15.257739000000 | -0.804685000000 |
| C | 0.074320000000  | 14.842144000000 | 0.806425000000  |
| H | 0.176649000000  | 15.814780000000 | 1.273272000000  |
| C | -0.771880000000 | 13.884462000000 | 1.390797000000  |
| C | -0.919133000000 | 12.613664000000 | 0.806913000000  |
| H | -1.605339000000 | 11.899327000000 | 1.248922000000  |
| C | -0.221904000000 | 12.311266000000 | -0.365526000000 |
| H | -0.355284000000 | 11.340759000000 | -0.833218000000 |
| C | -2.531967000000 | 15.669571000000 | 3.892234000000  |
| C | -2.978215000000 | 16.974595000000 | 4.042756000000  |
| H | -2.734808000000 | 17.712087000000 | 3.288694000000  |
| C | -3.749285000000 | 17.268749000000 | 5.178776000000  |
| H | -4.127819000000 | 18.272505000000 | 5.340753000000  |
| C | -4.018752000000 | 16.271703000000 | 6.090847000000  |
| H | -4.608249000000 | 16.469921000000 | 6.979800000000  |
| C | -3.508926000000 | 14.957296000000 | 5.879830000000  |
| C | -7.738185000000 | 12.422849000000 | 3.869044000000  |
| H | -8.798751000000 | 12.652009000000 | 3.838019000000  |
| C | -6.802517000000 | 13.361389000000 | 3.425091000000  |
| H | -7.134905000000 | 14.319270000000 | 3.036075000000  |
| C | -5.442878000000 | 13.068958000000 | 3.467199000000  |
| H | -4.715641000000 | 13.784558000000 | 3.099997000000  |
| C | -4.996421000000 | 11.823483000000 | 3.950334000000  |

|   |                |                |               |
|---|----------------|----------------|---------------|
| C | -5.94558000000 | 10.87406200000 | 4.38633700000 |
| H | -5.59928500000 | 9.91523700000  | 4.75093300000 |
| C | -7.29990100000 | 11.18213900000 | 4.34769300000 |
| H | -8.02358600000 | 10.44938000000 | 4.69222600000 |
| C | -1.52017000000 | 8.70203900000  | 4.17411100000 |
| H | -2.26570400000 | 7.95202900000  | 4.40965600000 |
| C | -0.19339900000 | 8.39145200000  | 4.02681600000 |
| H | 0.15648900000  | 7.37245600000  | 4.14954100000 |
| C | 0.72887800000  | 9.41996400000  | 3.68855300000 |
| H | 1.77864700000  | 9.20655900000  | 3.51989000000 |
| C | 0.22264400000  | 10.68750600000 | 3.57470800000 |
| N | -1.05946600000 | 11.05810600000 | 3.73895600000 |
| C | -0.49595100000 | 13.18819400000 | 5.45836100000 |
| O | 0.60870500000  | 13.59067700000 | 5.11179000000 |
| O | -1.13130700000 | 12.76280500000 | 6.40051000000 |
| H | 1.04573600000  | 12.59169300000 | 3.89145300000 |

-----  
**TS1 (S=1)** E(opt) = -1648.3373089 hartree  
 -----

Cartesian Coordinates

-----

|    |                |                |               |
|----|----------------|----------------|---------------|
| Ni | -2.13049800000 | 12.85538300000 | 3.92569500000 |
| N  | -1.35650800000 | 14.19338000000 | 2.48078000000 |
| N  | -1.61054200000 | 15.42749900000 | 2.65417500000 |
| N  | -2.84114500000 | 14.71760900000 | 4.56508900000 |
| N  | -4.04782200000 | 14.06835500000 | 6.45239600000 |
| H  | -3.53237400000 | 13.19642900000 | 6.48000200000 |
| H  | -4.49847000000 | 14.33868500000 | 7.31337500000 |
| N  | -3.67178000000 | 11.48944000000 | 4.05385800000 |
| N  | -3.32925200000 | 10.23133500000 | 4.01766300000 |

|   |                 |                 |                 |
|---|-----------------|-----------------|-----------------|
| C | -1.996380000000 | 10.007380000000 | 3.873027000000  |
| N | 1.009635000000  | 11.944726000000 | 3.347400000000  |
| H | 0.813603000000  | 12.420398000000 | 2.458999000000  |
| H | 1.999882000000  | 11.705082000000 | 3.382997000000  |
| C | 0.791261000000  | 13.290936000000 | -1.033410000000 |
| H | 1.336624000000  | 13.051451000000 | -1.940750000000 |
| C | 0.991788000000  | 14.524484000000 | -0.401832000000 |
| H | 1.696762000000  | 15.238075000000 | -0.816573000000 |
| C | 0.291655000000  | 14.845849000000 | 0.756414000000  |
| H | 0.432289000000  | 15.799121000000 | 1.252341000000  |
| C | -0.614464000000 | 13.915756000000 | 1.298080000000  |
| C | -0.811845000000 | 12.672514000000 | 0.671358000000  |
| H | -1.535427000000 | 11.975529000000 | 1.080511000000  |
| C | -0.111875000000 | 12.369971000000 | -0.497613000000 |
| H | -0.282371000000 | 11.419967000000 | -0.994083000000 |
| C | -2.371972000000 | 15.727543000000 | 3.779430000000  |
| C | -2.644655000000 | 17.072137000000 | 3.993989000000  |
| H | -2.238349000000 | 17.808367000000 | 3.312406000000  |
| C | -3.451630000000 | 17.410652000000 | 5.090261000000  |
| H | -3.696721000000 | 18.447544000000 | 5.294683000000  |
| C | -3.924888000000 | 16.409952000000 | 5.909881000000  |
| H | -4.547178000000 | 16.635751000000 | 6.769385000000  |
| C | -3.587068000000 | 15.050570000000 | 5.645563000000  |
| C | -7.815749000000 | 12.212710000000 | 4.221438000000  |
| H | -8.883158000000 | 12.406815000000 | 4.257157000000  |
| C | -6.943224000000 | 13.181891000000 | 3.720394000000  |
| H | -7.331540000000 | 14.127381000000 | 3.354280000000  |
| C | -5.573796000000 | 12.936582000000 | 3.679537000000  |
| H | -4.894544000000 | 13.678637000000 | 3.274662000000  |
| C | -5.063754000000 | 11.706264000000 | 4.129019000000  |

|   |                 |                 |                |
|---|-----------------|-----------------|----------------|
| C | -5.946056000000 | 10.726071000000 | 4.625323000000 |
| H | -5.544450000000 | 9.781485000000  | 4.970591000000 |
| C | -7.309633000000 | 10.988502000000 | 4.674702000000 |
| H | -7.985205000000 | 10.235264000000 | 5.068383000000 |
| C | -1.518660000000 | 8.679966000000  | 3.975576000000 |
| H | -2.238659000000 | 7.896061000000  | 4.177177000000 |
| C | -0.172695000000 | 8.427578000000  | 3.829375000000 |
| H | 0.214105000000  | 7.417291000000  | 3.905718000000 |
| C | 0.707998000000  | 9.504172000000  | 3.583118000000 |
| H | 1.773321000000  | 9.343984000000  | 3.458172000000 |
| C | 0.169138000000  | 10.769421000000 | 3.503035000000 |
| N | -1.143904000000 | 11.054733000000 | 3.620091000000 |
| C | -0.961297000000 | 12.903121000000 | 5.579524000000 |
| O | 0.237509000000  | 13.230544000000 | 5.320697000000 |
| O | -1.567236000000 | 12.648895000000 | 6.590940000000 |
| H | 0.684424000000  | 12.691178000000 | 4.293829000000 |

-----

5 (S=1) E(opt) = -1648.3565429 hartree

-----

Cartesian Coordinates

-----

|    |                 |                 |                |
|----|-----------------|-----------------|----------------|
| Ni | -1.971194000000 | 12.813478000000 | 4.223532000000 |
| N  | -1.683415000000 | 14.071764000000 | 2.583705000000 |
| N  | -2.043356000000 | 15.281124000000 | 2.713375000000 |
| N  | -3.079661000000 | 14.562933000000 | 4.723314000000 |
| N  | -3.942366000000 | 13.792094000000 | 6.731156000000 |
| H  | -4.249462000000 | 12.940465000000 | 6.273633000000 |
| H  | -4.507855000000 | 14.008791000000 | 7.542544000000 |
| N  | -3.647348000000 | 11.455029000000 | 3.894321000000 |
| N  | -3.364451000000 | 10.220484000000 | 3.908077000000 |

|   |                 |                 |                 |
|---|-----------------|-----------------|-----------------|
| C | -2.001552000000 | 9.909208000000  | 3.847080000000  |
| N | 1.168319000000  | 11.514416000000 | 3.627071000000  |
| H | 0.977288000000  | 12.464756000000 | 3.974702000000  |
| H | 2.134544000000  | 11.224287000000 | 3.633470000000  |
| C | 0.395521000000  | 13.162418000000 | -0.951879000000 |
| H | 0.924640000000  | 12.919178000000 | -1.868012000000 |
| C | 0.457087000000  | 14.462982000000 | -0.435496000000 |
| H | 1.039673000000  | 15.222934000000 | -0.946225000000 |
| C | -0.221576000000 | 14.786602000000 | 0.732203000000  |
| H | -0.181470000000 | 15.786222000000 | 1.147456000000  |
| C | -0.956602000000 | 13.790008000000 | 1.399740000000  |
| C | -1.004681000000 | 12.481707000000 | 0.895700000000  |
| H | -1.582386000000 | 11.728692000000 | 1.417676000000  |
| C | -0.338884000000 | 12.176631000000 | -0.288380000000 |
| H | -0.392052000000 | 11.171184000000 | -0.693392000000 |
| C | -2.739005000000 | 15.573861000000 | 3.889700000000  |
| C | -3.025760000000 | 16.909874000000 | 4.154140000000  |
| H | -2.721424000000 | 17.669793000000 | 3.445463000000  |
| C | -3.683222000000 | 17.210469000000 | 5.350637000000  |
| H | -3.923189000000 | 18.238391000000 | 5.601304000000  |
| C | -4.032020000000 | 16.184392000000 | 6.216996000000  |
| H | -4.549031000000 | 16.388447000000 | 7.148614000000  |
| C | -3.709238000000 | 14.857517000000 | 5.870146000000  |
| C | -7.753973000000 | 12.375966000000 | 4.001204000000  |
| H | -8.811190000000 | 12.621422000000 | 4.019343000000  |
| C | -6.851468000000 | 13.225790000000 | 3.356229000000  |
| H | -7.207075000000 | 14.123737000000 | 2.861110000000  |
| C | -5.492056000000 | 12.921077000000 | 3.342081000000  |
| H | -4.783901000000 | 13.562558000000 | 2.831252000000  |
| C | -5.039790000000 | 11.742410000000 | 3.955270000000  |

|   |                 |                 |                |
|---|-----------------|-----------------|----------------|
| C | -5.946728000000 | 10.879586000000 | 4.596853000000 |
| H | -5.579606000000 | 9.972377000000  | 5.063024000000 |
| C | -7.298246000000 | 11.207653000000 | 4.623298000000 |
| H | -8.000632000000 | 10.550317000000 | 5.125977000000 |
| C | -1.704193000000 | 8.558498000000  | 3.763937000000 |
| H | -2.509007000000 | 7.835220000000  | 3.790922000000 |
| C | -0.351962000000 | 8.194684000000  | 3.626460000000 |
| H | -0.067119000000 | 7.150279000000  | 3.554039000000 |
| C | 0.603169000000  | 9.180146000000  | 3.581028000000 |
| H | 1.654718000000  | 8.936523000000  | 3.470522000000 |
| C | 0.227076000000  | 10.558383000000 | 3.694210000000 |
| N | -1.076790000000 | 10.907644000000 | 3.829752000000 |
| C | -0.526560000000 | 13.533215000000 | 5.454653000000 |
| O | 0.612338000000  | 13.777900000000 | 5.082499000000 |
| O | -0.822399000000 | 13.806271000000 | 6.755697000000 |
| H | -1.755145000000 | 13.592453000000 | 6.933169000000 |

---

6 (S=1) E(opt) = -1572.2216726 hartree

---

Cartesian Coordinates

---

|    |                 |                 |                |
|----|-----------------|-----------------|----------------|
| Ni | -1.795939000000 | 12.840648000000 | 4.094465000000 |
| N  | -1.612281000000 | 14.168318000000 | 2.532143000000 |
| N  | -1.951966000000 | 15.364201000000 | 2.792057000000 |
| N  | -2.705367000000 | 14.513730000000 | 4.882566000000 |
| N  | -3.459263000000 | 13.658418000000 | 6.910453000000 |
| H  | -3.518589000000 | 12.728913000000 | 6.522795000000 |
| H  | -3.951125000000 | 13.795986000000 | 7.781872000000 |
| N  | -3.473987000000 | 11.567152000000 | 3.833975000000 |
| N  | -3.217111000000 | 10.342795000000 | 4.059245000000 |

|   |                 |                 |                 |
|---|-----------------|-----------------|-----------------|
| C | -1.864592000000 | 10.016662000000 | 4.159675000000  |
| N | 1.282187000000  | 11.602525000000 | 3.570628000000  |
| H | 1.000741000000  | 12.276540000000 | 2.869596000000  |
| H | 2.252521000000  | 11.322918000000 | 3.506605000000  |
| C | 0.072532000000  | 13.355510000000 | -1.225420000000 |
| H | 0.500413000000  | 13.135492000000 | -2.198299000000 |
| C | -0.022556000000 | 14.686126000000 | -0.790792000000 |
| H | 0.337148000000  | 15.489573000000 | -1.425102000000 |
| C | -0.573561000000 | 14.984140000000 | 0.447311000000  |
| H | -0.651801000000 | 16.007598000000 | 0.793109000000  |
| C | -1.028878000000 | 13.930886000000 | 1.268013000000  |
| C | -0.928237000000 | 12.593503000000 | 0.836842000000  |
| H | -1.316009000000 | 11.794761000000 | 1.459874000000  |
| C | -0.383141000000 | 12.312600000000 | -0.412868000000 |
| H | -0.323526000000 | 11.286257000000 | -0.759577000000 |
| C | -2.521260000000 | 15.578741000000 | 4.045317000000  |
| C | -2.875310000000 | 16.876626000000 | 4.375129000000  |
| H | -2.704589000000 | 17.675273000000 | 3.663962000000  |
| C | -3.443551000000 | 17.098460000000 | 5.643522000000  |
| H | -3.728319000000 | 18.100565000000 | 5.946624000000  |
| C | -3.648579000000 | 16.034357000000 | 6.494874000000  |
| H | -4.097542000000 | 16.176891000000 | 7.472083000000  |
| C | -3.279753000000 | 14.721941000000 | 6.083527000000  |
| C | -7.494043000000 | 12.609205000000 | 3.232245000000  |
| H | -8.530387000000 | 12.883137000000 | 3.061843000000  |
| C | -6.470271000000 | 13.474045000000 | 2.832529000000  |
| H | -6.709943000000 | 14.410122000000 | 2.339336000000  |
| C | -5.142136000000 | 13.129002000000 | 3.058990000000  |
| H | -4.343227000000 | 13.779508000000 | 2.725453000000  |
| C | -4.836340000000 | 11.898543000000 | 3.670730000000  |

|   |                 |                 |                |
|---|-----------------|-----------------|----------------|
| C | -5.868906000000 | 11.020073000000 | 4.064791000000 |
| H | -5.621209000000 | 10.074937000000 | 4.532655000000 |
| C | -7.189066000000 | 11.386630000000 | 3.849766000000 |
| H | -7.988704000000 | 10.721351000000 | 4.158358000000 |
| C | -1.535959000000 | 8.708598000000  | 4.473461000000 |
| H | -2.324065000000 | 7.985407000000  | 4.643303000000 |
| C | -0.171610000000 | 8.375833000000  | 4.559216000000 |
| H | 0.128342000000  | 7.365709000000  | 4.818152000000 |
| C | 0.784286000000  | 9.330654000000  | 4.276554000000 |
| H | 1.841580000000  | 9.088291000000  | 4.292792000000 |
| C | 0.374048000000  | 10.640354000000 | 3.914434000000 |
| N | -0.931171000000 | 10.987497000000 | 3.924066000000 |
| C | -0.013817000000 | 13.624428000000 | 5.179968000000 |
| O | 0.747579000000  | 14.146884000000 | 5.832001000000 |

---

7 (S=1) E(opt) = -1572.7169978 hartree

---

Cartesian Coordinates

---

|    |                 |                 |                |
|----|-----------------|-----------------|----------------|
| Ni | -1.948916000000 | 12.835934000000 | 4.033574000000 |
| N  | -1.482169000000 | 14.113844000000 | 2.511291000000 |
| N  | -1.785066000000 | 15.397903000000 | 2.706326000000 |
| N  | -2.835511000000 | 14.626373000000 | 4.679523000000 |
| N  | -3.777101000000 | 13.815041000000 | 6.643205000000 |
| H  | -3.857750000000 | 12.925484000000 | 6.166379000000 |
| H  | -4.509475000000 | 13.964885000000 | 7.322840000000 |
| N  | -3.493480000000 | 11.560871000000 | 3.986662000000 |
| N  | -3.246113000000 | 10.268668000000 | 3.956477000000 |
| C  | -1.912259000000 | 9.966511000000  | 3.919873000000 |
| N  | 1.175609000000  | 11.746975000000 | 3.564288000000 |

|   |                 |                 |                 |
|---|-----------------|-----------------|-----------------|
| H | 0.809208000000  | 12.507571000000 | 3.002014000000  |
| H | 2.119318000000  | 11.496410000000 | 3.302884000000  |
| C | 0.610751000000  | 13.274635000000 | -1.059975000000 |
| H | 1.148302000000  | 13.049620000000 | -1.976331000000 |
| C | 0.550524000000  | 14.587041000000 | -0.576965000000 |
| H | 1.048265000000  | 15.386236000000 | -1.120393000000 |
| C | -0.137309000000 | 14.888454000000 | 0.593150000000  |
| H | -0.193176000000 | 15.902884000000 | 0.967098000000  |
| C | -0.786414000000 | 13.864750000000 | 1.321495000000  |
| C | -0.729891000000 | 12.545507000000 | 0.823602000000  |
| H | -1.256815000000 | 11.760230000000 | 1.354188000000  |
| C | -0.038103000000 | 12.260009000000 | -0.351735000000 |
| H | -0.018128000000 | 11.238388000000 | -0.722043000000 |
| C | -2.477903000000 | 15.654714000000 | 3.840134000000  |
| C | -2.833651000000 | 16.990201000000 | 4.142460000000  |
| H | -2.537084000000 | 17.772464000000 | 3.454821000000  |
| C | -3.541412000000 | 17.243357000000 | 5.303133000000  |
| H | -3.826092000000 | 18.261132000000 | 5.555139000000  |
| C | -3.899971000000 | 16.194999000000 | 6.159670000000  |
| H | -4.455239000000 | 16.372827000000 | 7.074165000000  |
| C | -3.519259000000 | 14.891269000000 | 5.810671000000  |
| C | -7.606326000000 | 12.522321000000 | 3.962562000000  |
| H | -8.661333000000 | 12.780243000000 | 3.957830000000  |
| C | -6.672617000000 | 13.369818000000 | 3.361702000000  |
| H | -6.999421000000 | 14.285802000000 | 2.878091000000  |
| C | -5.317125000000 | 13.045637000000 | 3.368437000000  |
| H | -4.590343000000 | 13.690181000000 | 2.888462000000  |
| C | -4.882612000000 | 11.857816000000 | 3.978085000000  |
| C | -5.824580000000 | 10.997452000000 | 4.570826000000  |
| H | -5.477802000000 | 10.076926000000 | 5.025466000000  |

|   |                 |                 |                |
|---|-----------------|-----------------|----------------|
| C | -7.174920000000 | 11.336106000000 | 4.564441000000 |
| H | -7.895612000000 | 10.670188000000 | 5.031167000000 |
| C | -1.516005000000 | 8.620071000000  | 4.009126000000 |
| H | -2.277688000000 | 7.857087000000  | 4.110674000000 |
| C | -0.160325000000 | 8.329741000000  | 3.968652000000 |
| H | 0.181070000000  | 7.301359000000  | 4.041307000000 |
| C | 0.771333000000  | 9.358145000000  | 3.811734000000 |
| H | 1.834340000000  | 9.151456000000  | 3.746800000000 |
| C | 0.307799000000  | 10.679308000000 | 3.710557000000 |
| N | -1.005627000000 | 10.978423000000 | 3.790289000000 |
| C | -0.493386000000 | 13.434933000000 | 5.378762000000 |
| O | 0.171181000000  | 13.970112000000 | 6.132258000000 |

---

**TS2** ( $S=1/2$ )  $E(\text{opt}) = -1573.2542502$  hartree

---

Cartesian Coordinates

---

|    |                 |                 |                 |
|----|-----------------|-----------------|-----------------|
| Ni | -0.816050000000 | 0.210946000000  | -0.070206000000 |
| N  | -2.631562000000 | 0.377404000000  | -0.845374000000 |
| N  | -2.751785000000 | 1.047392000000  | -1.991685000000 |
| N  | -0.505609000000 | 1.554009000000  | -1.536760000000 |
| N  | 1.726131000000  | 2.030960000000  | -1.008977000000 |
| H  | 2.600974000000  | 2.339470000000  | -1.430611000000 |
| H  | 1.614023000000  | 2.496575000000  | -0.100404000000 |
| N  | -0.204156000000 | 0.853590000000  | 1.728443000000  |
| N  | -0.076378000000 | -0.108798000000 | 2.649427000000  |
| C  | -0.525944000000 | -1.314432000000 | 2.235503000000  |
| N  | -1.618354000000 | -2.815130000000 | -0.850558000000 |
| H  | -1.861869000000 | -1.956317000000 | -1.325776000000 |
| H  | -2.192981000000 | -3.605810000000 | -1.106327000000 |

|   |                 |                 |                 |
|---|-----------------|-----------------|-----------------|
| C | -6.092625000000 | -1.817647000000 | 0.198475000000  |
| H | -6.981077000000 | -2.374794000000 | 0.480328000000  |
| C | -5.827725000000 | -1.547936000000 | -1.148332000000 |
| H | -6.510187000000 | -1.899913000000 | -1.916983000000 |
| C | -4.690259000000 | -0.832454000000 | -1.515988000000 |
| H | -4.480188000000 | -0.618901000000 | -2.557350000000 |
| C | -3.792856000000 | -0.376465000000 | -0.531766000000 |
| C | -4.064850000000 | -0.647423000000 | 0.820521000000  |
| H | -3.381347000000 | -0.280786000000 | 1.578131000000  |
| C | -5.206553000000 | -1.361421000000 | 1.179399000000  |
| H | -5.408847000000 | -1.555718000000 | 2.228774000000  |
| C | -1.641046000000 | 1.742369000000  | -2.295964000000 |
| C | -1.645868000000 | 2.640109000000  | -3.399344000000 |
| H | -2.565785000000 | 2.752184000000  | -3.961315000000 |
| C | -0.505636000000 | 3.337085000000  | -3.714267000000 |
| H | -0.488154000000 | 4.021702000000  | -4.555657000000 |
| C | 0.652995000000  | 3.166364000000  | -2.919460000000 |
| H | 1.572876000000  | 3.697906000000  | -3.133395000000 |
| C | 0.582917000000  | 2.289001000000  | -1.860164000000 |
| C | 1.363435000000  | 4.627643000000  | 2.813186000000  |
| H | 1.760147000000  | 5.601364000000  | 3.083328000000  |
| C | 0.456348000000  | 4.500137000000  | 1.757033000000  |
| H | 0.133812000000  | 5.378965000000  | 1.205746000000  |
| C | -0.055125000000 | 3.249782000000  | 1.408379000000  |
| H | -0.785706000000 | 3.159135000000  | 0.610793000000  |
| C | 0.338035000000  | 2.087729000000  | 2.109825000000  |
| C | 1.253437000000  | 2.227883000000  | 3.179049000000  |
| H | 1.555968000000  | 1.342948000000  | 3.724811000000  |
| C | 1.751371000000  | 3.482232000000  | 3.518871000000  |
| H | 2.457296000000  | 3.567531000000  | 4.340900000000  |

|   |                 |                 |                 |
|---|-----------------|-----------------|-----------------|
| C | -0.533267000000 | -2.406508000000 | 3.132636000000  |
| H | -0.204705000000 | -2.245963000000 | 4.152309000000  |
| C | -0.953139000000 | -3.643106000000 | 2.672116000000  |
| H | -0.968705000000 | -4.497677000000 | 3.342412000000  |
| C | -1.345950000000 | -3.803422000000 | 1.340423000000  |
| H | -1.645592000000 | -4.769366000000 | 0.949464000000  |
| C | -1.325128000000 | -2.686043000000 | 0.487669000000  |
| N | -0.960440000000 | -1.462504000000 | 0.935336000000  |
| C | 1.222226000000  | -0.515146000000 | -0.517079000000 |
| O | 1.600445000000  | -1.625281000000 | -0.471584000000 |
| H | 1.694437000000  | 0.779979000000  | -0.784904000000 |

---

**8** ( $S=1/2$ ) E(opt) = -1573.2881096 hartree

---

Cartesian Coordinates

---

|    |                 |                 |                 |
|----|-----------------|-----------------|-----------------|
| Ni | -1.536189000000 | 12.110004000000 | 4.270648000000  |
| N  | -1.082966000000 | 12.810994000000 | 2.433493000000  |
| N  | -1.554622000000 | 14.007182000000 | 2.146959000000  |
| N  | -2.875461000000 | 13.655265000000 | 4.070751000000  |
| N  | -4.068393000000 | 13.299375000000 | 6.031505000000  |
| H  | -3.805206000000 | 12.326120000000 | 5.953534000000  |
| H  | -4.920586000000 | 13.475681000000 | 6.540536000000  |
| N  | -2.729338000000 | 10.504127000000 | 4.638710000000  |
| N  | -2.168502000000 | 9.486071000000  | 5.275050000000  |
| C  | -0.837692000000 | 9.651675000000  | 5.497527000000  |
| N  | 1.758522000000  | 11.929320000000 | 4.501709000000  |
| H  | 1.374034000000  | 12.165542000000 | 3.594447000000  |
| H  | 2.768405000000  | 11.892176000000 | 4.493144000000  |
| C  | 1.834403000000  | 11.281470000000 | -0.201016000000 |

|   |                 |                 |                 |
|---|-----------------|-----------------|-----------------|
| H | 2.582512000000  | 10.875493000000 | -0.875353000000 |
| C | 1.510254000000  | 12.642381000000 | -0.243621000000 |
| H | 2.012131000000  | 13.296333000000 | -0.951676000000 |
| C | 0.551021000000  | 13.173026000000 | 0.612377000000  |
| H | 0.288117000000  | 14.223059000000 | 0.581571000000  |
| C | -0.105441000000 | 12.336695000000 | 1.540451000000  |
| C | 0.220753000000  | 10.966167000000 | 1.577931000000  |
| H | -0.299827000000 | 10.319918000000 | 2.276500000000  |
| C | 1.183220000000  | 10.449317000000 | 0.712893000000  |
| H | 1.417220000000  | 9.389097000000  | 0.748160000000  |
| C | -2.512496000000 | 14.449220000000 | 3.012479000000  |
| C | -3.110616000000 | 15.706342000000 | 2.794408000000  |
| H | -2.786842000000 | 16.297203000000 | 1.946777000000  |
| C | -4.089345000000 | 16.129960000000 | 3.678285000000  |
| H | -4.578609000000 | 17.088407000000 | 3.531348000000  |
| C | -4.454882000000 | 15.329969000000 | 4.764388000000  |
| H | -5.225065000000 | 15.641441000000 | 5.461660000000  |
| C | -3.809803000000 | 14.095609000000 | 4.946932000000  |
| C | -6.813895000000 | 9.977782000000  | 3.699075000000  |
| H | -7.864599000000 | 9.854215000000  | 3.453458000000  |
| C | -6.017188000000 | 10.860589000000 | 2.965739000000  |
| H | -6.444046000000 | 11.421472000000 | 2.138926000000  |
| C | -4.668950000000 | 11.021647000000 | 3.277675000000  |
| H | -4.043418000000 | 11.690830000000 | 2.698220000000  |
| C | -4.094149000000 | 10.296309000000 | 4.336963000000  |
| C | -4.897475000000 | 9.397319000000  | 5.066999000000  |
| H | -4.444888000000 | 8.831838000000  | 5.872514000000  |
| C | -6.243769000000 | 9.248408000000  | 4.747599000000  |
| H | -6.854644000000 | 8.556739000000  | 5.321733000000  |
| C | -0.150468000000 | 8.697416000000  | 6.275025000000  |

|   |                 |                 |                |
|---|-----------------|-----------------|----------------|
| H | -0.710187000000 | 7.867210000000  | 6.687491000000 |
| C | 1.207032000000  | 8.865758000000  | 6.484441000000 |
| H | 1.760647000000  | 8.151905000000  | 7.087321000000 |
| C | 1.877724000000  | 9.942871000000  | 5.895950000000 |
| H | 2.948639000000  | 10.071889000000 | 6.011168000000 |
| C | 1.146871000000  | 10.850716000000 | 5.118278000000 |
| N | -0.190350000000 | 10.733481000000 | 4.953347000000 |
| C | -0.547596000000 | 13.625980000000 | 5.126550000000 |
| O | -0.449682000000 | 13.700887000000 | 6.312371000000 |
| H | -0.206691000000 | 14.431123000000 | 4.426710000000 |

---

**TS3** ( $S=0$ )  $E(\text{opt}) = -1573.8627003$  hartree

---

Cartesian Coordinates

---

|    |                 |                 |                 |
|----|-----------------|-----------------|-----------------|
| Ni | -1.439002000000 | 12.517461000000 | 4.262501000000  |
| N  | -0.783759000000 | 12.904674000000 | 2.458876000000  |
| N  | -1.132888000000 | 14.176179000000 | 2.020505000000  |
| N  | -2.609501000000 | 13.967633000000 | 3.833228000000  |
| N  | -4.299892000000 | 13.581418000000 | 5.429720000000  |
| H  | -4.584522000000 | 12.694734000000 | 5.005386000000  |
| H  | -5.117874000000 | 14.002739000000 | 5.866582000000  |
| N  | -2.660031000000 | 10.313272000000 | 4.174582000000  |
| N  | -1.975094000000 | 9.489588000000  | 4.857706000000  |
| C  | -0.608135000000 | 9.788820000000  | 4.915283000000  |
| N  | 1.578037000000  | 12.576686000000 | 4.475456000000  |
| H  | 0.960908000000  | 13.116971000000 | 3.871130000000  |
| H  | 2.567417000000  | 12.711927000000 | 4.320847000000  |
| C  | 1.535800000000  | 10.706089000000 | -0.333576000000 |
| H  | 2.132917000000  | 10.138734000000 | -1.041346000000 |

|   |                 |                 |                 |
|---|-----------------|-----------------|-----------------|
| C | 1.503798000000  | 12.104919000000 | -0.380274000000 |
| H | 2.084550000000  | 12.634113000000 | -1.132983000000 |
| C | 0.740042000000  | 12.840950000000 | 0.521144000000  |
| H | 0.718153000000  | 13.922188000000 | 0.465820000000  |
| C | -0.026094000000 | 12.196647000000 | 1.529029000000  |
| C | -0.004425000000 | 10.780750000000 | 1.545750000000  |
| H | -0.628628000000 | 10.255787000000 | 2.257962000000  |
| C | 0.765726000000  | 10.057470000000 | 0.637169000000  |
| H | 0.748534000000  | 8.970679000000  | 0.680158000000  |
| C | -2.067517000000 | 14.711453000000 | 2.761131000000  |
| C | -2.570977000000 | 16.038050000000 | 2.507039000000  |
| H | -2.076091000000 | 16.623753000000 | 1.739875000000  |
| C | -3.647099000000 | 16.511079000000 | 3.196782000000  |
| H | -4.039589000000 | 17.503580000000 | 2.996902000000  |
| C | -4.285449000000 | 15.682089000000 | 4.172563000000  |
| H | -5.195946000000 | 15.990328000000 | 4.672940000000  |
| C | -3.721601000000 | 14.461773000000 | 4.436289000000  |
| C | -6.819812000000 | 9.714988000000  | 3.957379000000  |
| H | -7.894486000000 | 9.578629000000  | 3.885543000000  |
| C | -6.175849000000 | 10.641104000000 | 3.132051000000  |
| H | -6.745601000000 | 11.221839000000 | 2.413543000000  |
| C | -4.796521000000 | 10.820065000000 | 3.231694000000  |
| H | -4.274412000000 | 11.530827000000 | 2.598452000000  |
| C | -4.053761000000 | 10.065148000000 | 4.156690000000  |
| C | -4.703727000000 | 9.132274000000  | 4.986188000000  |
| H | -4.121427000000 | 8.559495000000  | 5.698291000000  |
| C | -6.080334000000 | 8.964010000000  | 4.880947000000  |
| H | -6.584864000000 | 8.247975000000  | 5.522726000000  |
| C | 0.242785000000  | 8.754337000000  | 5.290629000000  |
| H | -0.177470000000 | 7.779752000000  | 5.504374000000  |

|   |                 |                 |                |
|---|-----------------|-----------------|----------------|
| C | 1.616106000000  | 9.013086000000  | 5.355690000000 |
| H | 2.309796000000  | 8.225626000000  | 5.631324000000 |
| C | 2.085142000000  | 10.279453000000 | 5.061445000000 |
| H | 3.142471000000  | 10.515739000000 | 5.105062000000 |
| C | 1.164897000000  | 11.297012000000 | 4.710617000000 |
| N | -0.163743000000 | 11.047990000000 | 4.648084000000 |
| C | -1.492734000000 | 12.729900000000 | 6.125108000000 |
| O | -2.388296000000 | 13.131613000000 | 6.924632000000 |
| H | -0.551917000000 | 12.497248000000 | 6.661162000000 |
| H | -3.386063000000 | 13.339107000000 | 6.287110000000 |

---

9 (S=0) E(opt) = -1573.8216501 hartree

---

Cartesian Coordinates

---

|    |                 |                 |                 |
|----|-----------------|-----------------|-----------------|
| Ni | -1.310985000000 | 12.618955000000 | 4.413128000000  |
| N  | -0.885394000000 | 12.919537000000 | 2.508449000000  |
| N  | -1.429449000000 | 14.029164000000 | 1.988347000000  |
| N  | -2.597946000000 | 13.984262000000 | 4.008943000000  |
| N  | -3.919904000000 | 13.757710000000 | 5.923245000000  |
| H  | -3.843018000000 | 12.759472000000 | 5.764187000000  |
| H  | -4.811286000000 | 14.015068000000 | 6.326016000000  |
| N  | -2.692038000000 | 10.596344000000 | 4.577424000000  |
| N  | -1.952074000000 | 9.607648000000  | 4.926654000000  |
| C  | -0.631454000000 | 9.916462000000  | 5.189511000000  |
| N  | 1.759844000000  | 12.478856000000 | 4.441274000000  |
| H  | 1.181481000000  | 12.977721000000 | 3.775679000000  |
| H  | 2.748208000000  | 12.487905000000 | 4.237480000000  |
| C  | 1.505849000000  | 10.712566000000 | -0.186830000000 |
| H  | 2.136713000000  | 10.145893000000 | -0.865472000000 |

|   |                 |                 |                 |
|---|-----------------|-----------------|-----------------|
| C | 1.405100000000  | 12.103754000000 | -0.307659000000 |
| H | 1.963295000000  | 12.622485000000 | -1.083083000000 |
| C | 0.597228000000  | 12.836319000000 | 0.554117000000  |
| H | 0.509997000000  | 13.912317000000 | 0.461690000000  |
| C | -0.126378000000 | 12.186350000000 | 1.579822000000  |
| C | -0.044207000000 | 10.784392000000 | 1.677122000000  |
| H | -0.650511000000 | 10.271299000000 | 2.411372000000  |
| C | 0.769036000000  | 10.062320000000 | 0.804573000000  |
| H | 0.810880000000  | 8.979784000000  | 0.892408000000  |
| C | -2.255481000000 | 14.645050000000 | 2.832976000000  |
| C | -2.806467000000 | 15.922207000000 | 2.534541000000  |
| H | -2.476470000000 | 16.424910000000 | 1.633550000000  |
| C | -3.733423000000 | 16.463911000000 | 3.391508000000  |
| H | -4.172496000000 | 17.434856000000 | 3.180722000000  |
| C | -4.150385000000 | 15.746585000000 | 4.536071000000  |
| H | -4.950305000000 | 16.115469000000 | 5.169417000000  |
| C | -3.562400000000 | 14.517764000000 | 4.809630000000  |
| C | -6.691203000000 | 9.760674000000  | 3.571879000000  |
| H | -7.729244000000 | 9.567157000000  | 3.317525000000  |
| C | -6.087352000000 | 10.962295000000 | 3.194988000000  |
| H | -6.651386000000 | 11.704415000000 | 2.637170000000  |
| C | -4.756573000000 | 11.214221000000 | 3.522965000000  |
| H | -4.264668000000 | 12.130340000000 | 3.214676000000  |
| C | -4.010001000000 | 10.252907000000 | 4.230988000000  |
| C | -4.620050000000 | 9.035570000000  | 4.601802000000  |
| H | -4.035962000000 | 8.305261000000  | 5.149091000000  |
| C | -5.950173000000 | 8.802488000000  | 4.276556000000  |
| H | -6.418595000000 | 7.867758000000  | 4.572901000000  |
| C | 0.141942000000  | 8.928158000000  | 5.817545000000  |
| H | -0.347661000000 | 8.019037000000  | 6.143747000000  |

|   |                 |                 |                |
|---|-----------------|-----------------|----------------|
| C | 1.502649000000  | 9.149169000000  | 5.979572000000 |
| H | 2.127768000000  | 8.401279000000  | 6.458194000000 |
| C | 2.069760000000  | 10.329379000000 | 5.505422000000 |
| H | 3.135639000000  | 10.516084000000 | 5.583188000000 |
| C | 1.244653000000  | 11.287514000000 | 4.891279000000 |
| N | -0.088258000000 | 11.091995000000 | 4.746794000000 |
| C | -1.070709000000 | 13.221678000000 | 6.098020000000 |
| O | -0.395804000000 | 12.622893000000 | 7.072691000000 |
| H | -1.460798000000 | 14.197351000000 | 6.415157000000 |
| H | -0.357993000000 | 13.167606000000 | 7.875179000000 |

---

---

**10** ( $S=1/2$ ) E(opt) = -1574.4640012 hartree

---

---

Cartesian Coordinates

---

---

|    |                 |                 |                 |
|----|-----------------|-----------------|-----------------|
| Ni | -1.781572000000 | 12.599620000000 | 4.107212000000  |
| N  | -1.373537000000 | 13.547688000000 | 2.395701000000  |
| N  | -1.281701000000 | 14.840600000000 | 2.453506000000  |
| N  | -1.667412000000 | 14.552007000000 | 4.772718000000  |
| N  | -1.998466000000 | 14.225812000000 | 7.039021000000  |
| H  | -1.960540000000 | 13.230049000000 | 6.891373000000  |
| H  | -2.086779000000 | 14.571304000000 | 7.978996000000  |
| N  | -3.877801000000 | 12.637728000000 | 4.095517000000  |
| N  | -4.414493000000 | 12.081920000000 | 5.110560000000  |
| C  | -3.573584000000 | 11.253614000000 | 5.832452000000  |
| N  | -0.229244000000 | 10.009963000000 | 5.713203000000  |
| H  | 0.070146000000  | 10.294778000000 | 4.785021000000  |
| H  | 0.292795000000  | 9.266278000000  | 6.148411000000  |
| C  | -0.524116000000 | 11.653545000000 | -1.272055000000 |

|   |                 |                 |                 |
|---|-----------------|-----------------|-----------------|
| H | -0.305983000000 | 11.156809000000 | -2.213235000000 |
| C | -0.299232000000 | 13.028792000000 | -1.132899000000 |
| H | 0.097404000000  | 13.595583000000 | -1.970755000000 |
| C | -0.572625000000 | 13.679525000000 | 0.066666000000  |
| H | -0.399373000000 | 14.742020000000 | 0.184871000000  |
| C | -1.085224000000 | 12.946900000000 | 1.158731000000  |
| C | -1.311721000000 | 11.562005000000 | 1.017560000000  |
| H | -1.729842000000 | 11.006732000000 | 1.852455000000  |
| C | -1.032417000000 | 10.925513000000 | -0.191555000000 |
| H | -1.218211000000 | 9.860409000000  | -0.294617000000 |
| C | -1.473986000000 | 15.388237000000 | 3.705334000000  |
| C | -1.442265000000 | 16.780816000000 | 3.838488000000  |
| H | -1.286444000000 | 17.393180000000 | 2.959781000000  |
| C | -1.614489000000 | 17.322538000000 | 5.114182000000  |
| H | -1.595322000000 | 18.399091000000 | 5.254904000000  |
| C | -1.802735000000 | 16.485532000000 | 6.204887000000  |
| H | -1.927582000000 | 16.877713000000 | 7.209798000000  |
| C | -1.822152000000 | 15.083336000000 | 5.997273000000  |
| C | -6.462543000000 | 15.102648000000 | 1.866621000000  |
| H | -7.126410000000 | 15.732811000000 | 1.281873000000  |
| C | -5.376659000000 | 14.472338000000 | 1.255313000000  |
| H | -5.201880000000 | 14.599800000000 | 0.191603000000  |
| C | -4.513578000000 | 13.674795000000 | 2.004451000000  |
| H | -3.684640000000 | 13.162606000000 | 1.533091000000  |
| C | -4.752540000000 | 13.488650000000 | 3.372754000000  |
| C | -5.850653000000 | 14.115382000000 | 3.989811000000  |
| H | -6.018451000000 | 13.963514000000 | 5.049189000000  |
| C | -6.693512000000 | 14.923660000000 | 3.235461000000  |
| H | -7.534558000000 | 15.418508000000 | 3.712280000000  |
| C | -4.150241000000 | 10.549534000000 | 6.886025000000  |

|   |                 |                 |                |
|---|-----------------|-----------------|----------------|
| H | -5.199634000000 | 10.700303000000 | 7.103841000000 |
| C | -3.348821000000 | 9.653238000000  | 7.600700000000 |
| H | -3.760918000000 | 9.086013000000  | 8.429307000000 |
| C | -2.034184000000 | 9.473931000000  | 7.213389000000 |
| H | -1.390430000000 | 8.757894000000  | 7.714797000000 |
| C | -1.508598000000 | 10.212386000000 | 6.119746000000 |
| N | -2.248096000000 | 11.149746000000 | 5.475181000000 |
| C | 0.249813000000  | 12.458784000000 | 4.240978000000 |
| O | 0.673768000000  | 11.329802000000 | 3.559909000000 |
| H | 0.644459000000  | 13.398541000000 | 3.859402000000 |
| H | 0.787200000000  | 11.521952000000 | 2.619403000000 |
| H | 0.397827000000  | 12.312798000000 | 5.309219000000 |

-----

**11** ( $S=1/2$ )  $E(\text{opt}) = -1498.7688512$  hartree

-----

Cartesian Coordinates

-----

|    |                 |                 |                |
|----|-----------------|-----------------|----------------|
| Ni | -1.832372000000 | 12.909655000000 | 4.306145000000 |
| N  | -1.270342000000 | 13.364516000000 | 2.396195000000 |
| N  | -1.042055000000 | 14.592939000000 | 2.184941000000 |
| N  | -1.753318000000 | 14.901231000000 | 4.430277000000 |
| N  | -2.439364000000 | 15.190028000000 | 6.641878000000 |
| H  | -2.448618000000 | 14.196979000000 | 6.808329000000 |
| H  | -2.616814000000 | 15.788132000000 | 7.434722000000 |
| N  | -3.936182000000 | 12.816134000000 | 4.326629000000 |
| N  | -4.354282000000 | 11.899552000000 | 5.100861000000 |
| C  | -3.414814000000 | 10.940366000000 | 5.457225000000 |
| N  | -0.136875000000 | 9.896742000000  | 4.470445000000 |
| H  | -0.002099000000 | 10.435363000000 | 3.627988000000 |
| H  | 0.442236000000  | 9.075655000000  | 4.572904000000 |

|   |                 |                 |                 |
|---|-----------------|-----------------|-----------------|
| C | -0.450785000000 | 10.615667000000 | -0.664540000000 |
| H | -0.248709000000 | 9.899242000000  | -1.454389000000 |
| C | 0.123127000000  | 11.894101000000 | -0.720441000000 |
| H | 0.772032000000  | 12.160774000000 | -1.548134000000 |
| C | -0.131107000000 | 12.823116000000 | 0.279171000000  |
| H | 0.307825000000  | 13.813144000000 | 0.248817000000  |
| C | -0.966421000000 | 12.460662000000 | 1.355727000000  |
| C | -1.538859000000 | 11.175261000000 | 1.419076000000  |
| H | -2.214633000000 | 10.923929000000 | 2.230129000000  |
| C | -1.283387000000 | 10.259981000000 | 0.401868000000  |
| H | -1.740643000000 | 9.276455000000  | 0.430403000000  |
| C | -1.324835000000 | 15.442949000000 | 3.251595000000  |
| C | -1.174661000000 | 16.803702000000 | 3.051282000000  |
| H | -0.835379000000 | 17.166481000000 | 2.088906000000  |
| C | -1.486235000000 | 17.662572000000 | 4.122599000000  |
| H | -1.382610000000 | 18.736665000000 | 4.010170000000  |
| C | -1.917324000000 | 17.132311000000 | 5.317291000000  |
| H | -2.152573000000 | 17.770639000000 | 6.162265000000  |
| C | -2.038161000000 | 15.718713000000 | 5.464414000000  |
| C | -6.794601000000 | 15.550571000000 | 2.928092000000  |
| H | -7.534450000000 | 16.249185000000 | 2.550430000000  |
| C | -5.596756000000 | 15.360340000000 | 2.231825000000  |
| H | -5.413608000000 | 15.896641000000 | 1.306703000000  |
| C | -4.643123000000 | 14.472832000000 | 2.719179000000  |
| H | -3.730461000000 | 14.292053000000 | 2.165107000000  |
| C | -4.902022000000 | 13.752995000000 | 3.900064000000  |
| C | -6.114274000000 | 13.936449000000 | 4.598343000000  |
| H | -6.300959000000 | 13.376368000000 | 5.506673000000  |
| C | -7.047153000000 | 14.840142000000 | 4.110940000000  |
| H | -7.977619000000 | 14.994141000000 | 4.647429000000  |

|   |                 |                 |                |
|---|-----------------|-----------------|----------------|
| C | -3.835977000000 | 9.923911000000  | 6.293470000000 |
| H | -4.851193000000 | 9.936332000000  | 6.669927000000 |
| C | -2.924644000000 | 8.895353000000  | 6.602363000000 |
| H | -3.212719000000 | 8.089869000000  | 7.269730000000 |
| C | -1.683182000000 | 8.896001000000  | 6.011631000000 |
| H | -0.978082000000 | 8.089926000000  | 6.184984000000 |
| C | -1.319445000000 | 9.948331000000  | 5.121168000000 |
| N | -2.143497000000 | 11.010404000000 | 4.920938000000 |
| C | 0.122235000000  | 12.922183000000 | 4.870863000000 |
| H | 0.407206000000  | 13.952832000000 | 5.054915000000 |
| H | 0.679825000000  | 12.476219000000 | 4.052192000000 |
| H | 0.106589000000  | 12.308445000000 | 5.770046000000 |

---

**12** ( $S=1$ )  $E(\text{opt}) = -1499.2624592$  hartree

---

Cartesian Coordinates

---

|    |                 |                 |                |
|----|-----------------|-----------------|----------------|
| Ni | -1.797201000000 | 12.818809000000 | 4.119877000000 |
| N  | -1.361498000000 | 13.491290000000 | 2.281050000000 |
| N  | -0.996652000000 | 14.732398000000 | 2.170163000000 |
| N  | -1.808901000000 | 14.873397000000 | 4.374958000000 |
| N  | -2.649351000000 | 14.895951000000 | 6.503380000000 |
| H  | -3.164984000000 | 14.054521000000 | 6.268262000000 |
| H  | -3.079103000000 | 15.451875000000 | 7.226644000000 |
| N  | -3.889372000000 | 12.735915000000 | 4.329922000000 |
| N  | -4.284051000000 | 11.986775000000 | 5.359912000000 |
| C  | -3.376234000000 | 11.063779000000 | 5.758202000000 |
| N  | -0.174383000000 | 9.778903000000  | 4.748577000000 |
| H  | -0.093047000000 | 10.274425000000 | 3.875356000000 |
| H  | 0.286700000000  | 8.884700000000  | 4.796705000000 |

|   |                 |                 |                 |
|---|-----------------|-----------------|-----------------|
| C | -0.459063000000 | 10.877255000000 | -0.895110000000 |
| H | -0.240148000000 | 10.193514000000 | -1.709903000000 |
| C | 0.091897000000  | 12.163260000000 | -0.891003000000 |
| H | 0.741738000000  | 12.476461000000 | -1.703234000000 |
| C | -0.181203000000 | 13.048448000000 | 0.147392000000  |
| H | 0.235909000000  | 14.047728000000 | 0.163291000000  |
| C | -1.019583000000 | 12.644403000000 | 1.201210000000  |
| C | -1.574361000000 | 11.352736000000 | 1.197900000000  |
| H | -2.235466000000 | 11.057166000000 | 2.007901000000  |
| C | -1.293469000000 | 10.476834000000 | 0.152002000000  |
| H | -1.732355000000 | 9.483441000000  | 0.151229000000  |
| C | -1.287283000000 | 15.491398000000 | 3.287075000000  |
| C | -1.000945000000 | 16.861883000000 | 3.271702000000  |
| H | -0.563535000000 | 17.304034000000 | 2.385417000000  |
| C | -1.302653000000 | 17.592807000000 | 4.406272000000  |
| H | -1.107388000000 | 18.660387000000 | 4.436200000000  |
| C | -1.872336000000 | 16.965219000000 | 5.507901000000  |
| H | -2.143237000000 | 17.525297000000 | 6.396552000000  |
| C | -2.117836000000 | 15.584047000000 | 5.452638000000  |
| C | -6.830459000000 | 15.333972000000 | 2.768918000000  |
| H | -7.579593000000 | 16.004861000000 | 2.358668000000  |
| C | -5.613074000000 | 15.142032000000 | 2.109682000000  |
| H | -5.411740000000 | 15.660759000000 | 1.176084000000  |
| C | -4.650257000000 | 14.284263000000 | 2.633197000000  |
| H | -3.717260000000 | 14.125764000000 | 2.107431000000  |
| C | -4.883294000000 | 13.590785000000 | 3.838548000000  |
| C | -6.122002000000 | 13.779833000000 | 4.493405000000  |
| H | -6.312754000000 | 13.233257000000 | 5.408308000000  |
| C | -7.073231000000 | 14.643274000000 | 3.961001000000  |
| H | -8.018738000000 | 14.777314000000 | 4.480918000000  |

|   |                 |                 |                |
|---|-----------------|-----------------|----------------|
| C | -3.728499000000 | 10.202142000000 | 6.821008000000 |
| H | -4.688718000000 | 10.345902000000 | 7.300588000000 |
| C | -2.855790000000 | 9.190556000000  | 7.179171000000 |
| H | -3.110543000000 | 8.508182000000  | 7.985347000000 |
| C | -1.655141000000 | 9.024246000000  | 6.485134000000 |
| H | -0.968821000000 | 8.217800000000  | 6.719843000000 |
| C | -1.344967000000 | 9.924336000000  | 5.450656000000 |
| N | -2.157807000000 | 10.955870000000 | 5.116092000000 |
| C | 0.241204000000  | 12.781334000000 | 4.340374000000 |
| H | 0.619406000000  | 13.794927000000 | 4.201016000000 |
| H | 0.718438000000  | 12.115090000000 | 3.618385000000 |
| H | 0.416892000000  | 12.429632000000 | 5.359547000000 |

---

**1+CH<sub>4</sub> (S=1) E(opt) = -1499.7475504 hartree**

---

Cartesian Coordinates

---

|    |                 |                 |                |
|----|-----------------|-----------------|----------------|
| Ni | -2.846741000000 | 13.250927000000 | 4.075858000000 |
| N  | -1.771505000000 | 13.764275000000 | 2.442587000000 |
| N  | -0.992866000000 | 14.775607000000 | 2.546221000000 |
| N  | -1.804358000000 | 14.850676000000 | 4.767971000000 |
| N  | -2.677145000000 | 14.913758000000 | 6.913407000000 |
| H  | -3.024441000000 | 13.977292000000 | 6.766409000000 |
| H  | -2.667257000000 | 15.274375000000 | 7.853530000000 |
| N  | -4.770267000000 | 12.656624000000 | 3.984535000000 |
| N  | -5.133968000000 | 11.709267000000 | 4.767249000000 |
| C  | -4.092932000000 | 11.151216000000 | 5.500177000000 |
| N  | -0.650301000000 | 11.848871000000 | 6.127861000000 |
| H  | -0.502809000000 | 12.572134000000 | 5.439219000000 |
| H  | 0.168384000000  | 11.383539000000 | 6.486380000000 |

|   |                 |                 |                 |
|---|-----------------|-----------------|-----------------|
| C | -1.546283000000 | 11.481010000000 | -1.082517000000 |
| H | -1.497448000000 | 10.881864000000 | -1.986411000000 |
| C | -0.680504000000 | 12.571175000000 | -0.919636000000 |
| H | 0.038148000000  | 12.812133000000 | -1.696608000000 |
| C | -0.732169000000 | 13.346585000000 | 0.231345000000  |
| H | -0.066493000000 | 14.189013000000 | 0.372038000000  |
| C | -1.666542000000 | 13.029256000000 | 1.236189000000  |
| C | -2.537257000000 | 11.939686000000 | 1.070716000000  |
| H | -3.261307000000 | 11.713388000000 | 1.846759000000  |
| C | -2.471968000000 | 11.166539000000 | -0.085652000000 |
| H | -3.145631000000 | 10.325084000000 | -0.211137000000 |
| C | -1.072858000000 | 15.427013000000 | 3.773042000000  |
| C | -0.390503000000 | 16.628328000000 | 3.927328000000  |
| H | 0.179374000000  | 17.028092000000 | 3.098350000000  |
| C | -0.486318000000 | 17.277419000000 | 5.165460000000  |
| H | 0.028259000000  | 18.218656000000 | 5.329293000000  |
| C | -1.237731000000 | 16.717310000000 | 6.182255000000  |
| H | -1.322597000000 | 17.199949000000 | 7.149899000000  |
| C | -1.904742000000 | 15.486572000000 | 5.954718000000  |
| C | -7.775451000000 | 14.680045000000 | 1.849493000000  |
| H | -8.541316000000 | 15.211833000000 | 1.293548000000  |
| C | -6.427315000000 | 14.975317000000 | 1.637552000000  |
| H | -6.140735000000 | 15.733747000000 | 0.916263000000  |
| C | -5.445826000000 | 14.289307000000 | 2.348081000000  |
| H | -4.394665000000 | 14.499340000000 | 2.180567000000  |
| C | -5.813861000000 | 13.306488000000 | 3.282089000000  |
| C | -7.173618000000 | 13.009492000000 | 3.496896000000  |
| H | -7.443862000000 | 12.253292000000 | 4.223254000000  |
| C | -8.142592000000 | 13.696812000000 | 2.778536000000  |
| H | -9.191805000000 | 13.472230000000 | 2.942483000000  |

|   |                 |                 |                |
|---|-----------------|-----------------|----------------|
| C | -4.348961000000 | 10.001149000000 | 6.239393000000 |
| H | -5.342258000000 | 9.571008000000  | 6.226935000000 |
| C | -3.288814000000 | 9.440208000000  | 6.961603000000 |
| H | -3.443267000000 | 8.539964000000  | 7.547493000000 |
| C | -2.039545000000 | 10.034857000000 | 6.928269000000 |
| H | -1.206200000000 | 9.624034000000  | 7.487924000000 |
| C | -1.852133000000 | 11.208975000000 | 6.158452000000 |
| N | -2.873396000000 | 11.761389000000 | 5.468242000000 |
| C | 1.961268000000  | 11.966712000000 | 3.272333000000 |
| H | 1.496315000000  | 12.127512000000 | 2.297604000000 |
| H | 1.313245000000  | 11.331259000000 | 3.881776000000 |
| H | 2.117538000000  | 12.928950000000 | 3.766360000000 |
| H | 2.924672000000  | 11.471482000000 | 3.138164000000 |

---

## References

- 1 S. Guria, D. Dolui, C. Das, S. Ghorai, V. Vishal, D. Maiti, G. K. Lahiri and A. Dutta, *Nat Commun*, 2023, **14**, 6859.
- 2 Chemissian: software to analyze spectra, build density maps and molecular orbitals |, <https://www.chemissian.com/>, (accessed January 24, 2025).
- 3 Chemcraft - Graphical program for visualization of quantum chemistry computations, <https://www.chemcraftprog.com/>, (accessed September 23, 2024).
- 4 R. Bauernschmitt and R. Ahlrichs, *Chemical Physics Letters*, 1996, **256**, 454–464.
- 5 M. E. Casida, C. Jamorski, K. C. Casida and D. R. Salahub, *The Journal of Chemical Physics*, 1998, **108**, 4439–4449.
- 6 R. E. Stratmann, G. E. Scuseria and M. J. Frisch, *Journal of Chemical Physics*, 1998, **109**, 8218–8224.
- 7 M. Cossi, N. Rega, G. Scalmani and V. Barone, *Journal of Computational Chemistry*, 2003, **24**, 669–681.
- 8 V. Barone and M. Cossi, *J. Phys. Chem. A*, 1998, **102**, 1995–2001.
- 9 M. Cossi and V. Barone, *The Journal of Chemical Physics*, 2001, **115**, 4708–4717.
- 10 S. I. Gorelsky and A. B. P. Lever, *Journal of Organometallic Chemistry*, 2001, **635**, 187–196.
